# Supplementary material
Source: Research Square preprint supplement (doi:10.21203/rs.3.rs-9605572/v1)
Supplement: Supplementary file 2 [file ed00d0b0d471c3b96dcec1b2.xlsx]

## Sheet: 01_TOC
Sheet	Description	Analysis Group
02_lipid_list	Full list of analysed lipid species with class annotations	Reference
03_n_lipid	Sample size (N) per lipid regression analysis and covariate model	Reference
04_n_prs	Sample size (N) per PRS regression analysis and covariate model	Reference
05_prs_std	PRS associations with severe psychosis subtype probability (standard covariates: age, sex, ancestry PCs)	PRS ~ Subtype Probability
06_lip_std	Lipid Species associations with severe psychosis subtype probability (standard covariates: sex, BMI, illness duration, smoking status)	Lipid Species ~ Subtype Probability
07_lip_cov_diag	Lipid Species ~ subtype probability: sensitivity additionally controlling for psychiatric diagnosis	Lipid Species ~ Subtype Probability
08_lip_cov_med	Lipid Species ~ subtype probability: sensitivity additionally controlling for antipsychotic medication	Lipid Species ~ Subtype Probability
09_lip_cov_med_diag	Lipid Species ~ subtype probability: sensitivity additionally controlling for medication and diagnosis	Lipid Species ~ Subtype Probability
10_lip_cov_panss_pos	Lipid Species ~ subtype probability: sensitivity additionally controlling for PANSS Positive subscale score	Lipid Species ~ Subtype Probability
11_lip_cov_panss_neg	Lipid Species ~ subtype probability: sensitivity additionally controlling for PANSS Negative subscale score	Lipid Species ~ Subtype Probability
12_lip_cov_panss_gen	Lipid Species ~ subtype probability: sensitivity additionally controlling for PANSS General Psychopathology subscale score	Lipid Species ~ Subtype Probability
13_lip_cov_panss_tot	Lipid Species ~ subtype probability: sensitivity additionally controlling for PANSS Total Score	Lipid Species ~ Subtype Probability
14_enrich_std	Lipid class enrichment analysis for severe psychosis subtype probability (standard covariates; permutation-based enrichment scores)	Lipid Class Enrichment ~ Subtype Probability
15_enrich_cov_diag	Lipid class enrichment: sensitivity additionally controlling for psychiatric diagnosis	Lipid Class Enrichment ~ Subtype Probability
16_enrich_cov_med	Lipid class enrichment: sensitivity additionally controlling for antipsychotic medication	Lipid Class Enrichment ~ Subtype Probability
17_enrich_cov_med_diag	Lipid class enrichment: sensitivity additionally controlling for medication and diagnosis	Lipid Class Enrichment ~ Subtype Probability
18_enrich_cov_panss_pos	Lipid class enrichment: sensitivity additionally controlling for PANSS Positive subscale score	Lipid Class Enrichment ~ Subtype Probability
19_enrich_cov_panss_neg	Lipid class enrichment: sensitivity additionally controlling for PANSS Negative subscale score	Lipid Class Enrichment ~ Subtype Probability
20_enrich_cov_panss_gen	Lipid class enrichment: sensitivity additionally controlling for PANSS General Psychopathology subscale score	Lipid Class Enrichment ~ Subtype Probability
21_enrich_cov_panss_tot	Lipid class enrichment: sensitivity additionally controlling for PANSS Total Score	Lipid Class Enrichment ~ Subtype Probability
22_enrich_cov_antidepressants	Lipid class enrichment: sensitivity additionally controlling for antidepressant medication	Lipid Class Enrichment ~ Subtype Probability
23_enrich_cov_antipsychotics	Lipid class enrichment: sensitivity additionally controlling for antipsychotic medication class	Lipid Class Enrichment ~ Subtype Probability
24_enrich_cov_mood_stabilizers	Lipid class enrichment: sensitivity additionally controlling for mood stabilizer medication	Lipid Class Enrichment ~ Subtype Probability
25_enrich_cov_tranquilizers	Lipid class enrichment: sensitivity additionally controlling for tranquilizer medication	Lipid Class Enrichment ~ Subtype Probability
26_prs_panss_std	PRS associations with PANSS subscale scores as continuous outcomes (standard covariates; all four subscales stacked — see 'panss_outcome' column: PANSS Positive, Negative, General, Total Score)	PRS ~ PANSS Subscales as Outcome
27_lip_panss_std	Top-20 lipid associations with PANSS subscale scores as continuous outcomes (standard covariates; all four subscales stacked — see 'panss_outcome' column)	Lipid ~ PANSS Subscales as Outcome
28_lip_panss_cov_med	Top-20 lipids ~ PANSS subscales as outcome: sensitivity additionally controlling for antipsychotic medication (all four subscales stacked)	Lipid ~ PANSS Subscales as Outcome
29_lip_panss_cov_diag	Top-20 lipids ~ PANSS subscales as outcome: sensitivity additionally controlling for psychiatric diagnosis (all four subscales stacked)	Lipid ~ PANSS Subscales as Outcome
30_lip_panss_cov_med_diag	Top-20 lipids ~ PANSS subscales as outcome: sensitivity additionally controlling for medication and diagnosis (all four subscales stacked)	Lipid ~ PANSS Subscales as Outcome
31_enrich_panss_std	Lipid class enrichment with PANSS subscale scores as outcomes (standard covariates; all available subscales stacked — see 'panss_outcome' column: Positive, Negative, General, Total Score)	Lipid Class Enrichment ~ PANSS as Outcome
32_r2_incremental	Incremental R² decomposition: variance in severe psychosis subtype probability explained by PRS block and lipid class block (permutation-based p-values; 20 000 permutations)	Incremental R²
33_r2_individual	Individual predictor ΔR²: unique variance explained by each significant PRS and each enriched lipid class score (permutation-based p-values; 20 000 permutations)	Incremental R²
34_mediation	Mediation analysis results: indirect effects of PRS on severe psychosis subtype probability via lipid species	Mediation Analysis
35_cca_loadings	Full CCA canonical loadings for the first canonical variate: PRS block (13 polygenic scores) and lipid class block (16 lipid classes). The 'block' column identifies the input block; 'variable' is the feature name; 'loading' is the correlation between the feature and its canonical component score.	CCA Analysis

## Sheet: 02_lipid_list
lipid	class	lipid_species	lipid
gpeakpos7470	TAG	TAG 40:1	gpeakpos7470
gpeakpos7514	TAG	TAG 40:0	gpeakpos7514
gpeakpos7730	TAG	TAG 41:1	gpeakpos7730
gpeakpos7769	TAG	TAG 41:0	gpeakpos7769
gpeakpos7961	TAG	TAG 42:2	gpeakpos7961
gpeakpos7997	TAG	TAG 42:1	gpeakpos7997
gpeakpos8043	TAG	TAG 42:0	gpeakpos8043
gpeakpos8324	TAG	TAG 43:1	gpeakpos8324
gpeakpos8631	TAG	TAG 44:2	gpeakpos8631
gpeakpos8679	TAG	TAG 44:1	gpeakpos8679
gpeakpos8733	TAG	TAG 44:0	gpeakpos8733
gpeakpos9000	TAG	TAG 45:2	gpeakpos9000
gpeakpos9264	TAG	TAG 46:4	gpeakpos9264
gpeakpos9328	TAG	TAG 46:3	gpeakpos9328
gpeakpos9390	TAG	TAG 46:2	gpeakpos9390
gpeakpos9446	TAG	TAG 46:1	gpeakpos9446
gpeakpos9505	TAG	TAG 46:0	gpeakpos9505
gpeakpos9794	TAG	TAG 47:3	gpeakpos9794
gpeakpos9863	TAG	TAG 47:2	gpeakpos9863
gpeakpos9918	TAG	TAG 47:1	gpeakpos9918
gpeakpos10107	TAG	TAG 48:5	gpeakpos10107
gpeakpos10171	TAG	TAG 48:4	gpeakpos10171
gpeakpos10236	TAG	TAG 48:3	gpeakpos10236
gpeakpos10371	TAG	TAG 48:1	gpeakpos10371
gpeakpos10445	TAG	TAG 48:0	gpeakpos10445
gpeakpos10660	TAG	TAG 49:4	gpeakpos10660
gpeakpos10723	TAG	TAG 49:3	gpeakpos10723
gpeakpos10860	TAG	TAG 49:1	gpeakpos10860
gpeakpos10926	TAG	TAG 49:0	gpeakpos10926
gpeakpos11003	TAG	TAG 50:6	gpeakpos11003
gpeakpos11076	TAG	TAG 50:5	gpeakpos11076
gpeakpos11134	TAG	TAG 50:4	gpeakpos11134
gpeakpos11200	TAG	TAG 50:3	gpeakpos11200
gpeakpos11253	TAG	TAG 50:2	gpeakpos11253
gpeakpos11314	TAG	TAG 50:1	gpeakpos11314
gpeakpos11389	TAG	TAG 50:0	gpeakpos11389
gpeakpos11522	TAG	TAG 51:5	gpeakpos11522
gpeakpos11585	TAG	TAG 51:4	gpeakpos11585
gpeakpos11639	TAG	TAG 51:3	gpeakpos11639
gpeakpos11690	TAG	TAG 51:2	gpeakpos11690
gpeakpos11823	TAG	TAG 52:7	gpeakpos11823
gpeakpos11828	TAG	TAG 51:0	gpeakpos11828
gpeakpos11905	TAG	TAG 52:6	gpeakpos11905
gpeakpos11964	TAG	TAG 52:5	gpeakpos11964
gpeakpos12022	TAG	TAG 52:4	gpeakpos12022
gpeakpos12080	TAG	TAG 52:3	gpeakpos12080
gpeakpos12125	TAG	TAG 52:2	gpeakpos12125
gpeakpos12192	TAG	TAG 52:1	gpeakpos12192
gpeakpos12323	TAG	TAG 53:6	gpeakpos12323
gpeakpos12430	TAG	TAG 53:4	gpeakpos12430
gpeakpos12484	TAG	TAG 53:3	gpeakpos12484
gpeakpos12743	TAG	TAG 54:6	gpeakpos12743
gpeakpos12792	TAG	TAG 54:5	gpeakpos12792
gpeakpos12841	TAG	TAG 54:4	gpeakpos12841
gpeakpos12892	TAG	TAG 54:3	gpeakpos12892
gpeakpos12955	TAG	TAG 54:2	gpeakpos12955
gpeakpos13012	TAG	TAG 55:8	gpeakpos13012
gpeakpos13066	TAG	TAG 55:7	gpeakpos13066
gpeakpos13118	TAG	TAG 55:6	gpeakpos13118
gpeakpos13174	TAG	TAG 55:5	gpeakpos13174
gpeakpos13342	TAG	TAG 56:9	gpeakpos13342
gpeakpos13459	TAG	TAG 56:7	gpeakpos13459
gpeakpos13500	TAG	TAG 56:6	gpeakpos13500
gpeakpos13549	TAG	TAG 56:5	gpeakpos13549
gpeakpos13594	TAG	TAG 56:4	gpeakpos13594
gpeakpos13728	TAG	TAG 57:8	gpeakpos13728
gpeakpos13775	TAG	TAG 57:7	gpeakpos13775
gpeakpos13980	TAG	TAG 58:10	gpeakpos13980
gpeakpos14026	TAG	TAG 58:9	gpeakpos14026
gpeakpos14078	TAG	TAG 58:8	gpeakpos14078
gpeakpos14294	TAG	TAG 58:3	gpeakpos14294
gpeakpos1999	CAR	CAR 10:3	gpeakpos1999
gpeakpos2041	CAR	CAR 10:2	gpeakpos2041
gpeakpos2069	CAR	CAR 10:1	gpeakpos2069
gpeakpos2099	CAR	CAR 10:0	gpeakpos2099
gpeakpos2229	CAR	CAR 11:1	gpeakpos2229
gpeakpos2348	CAR	CAR 12:2	gpeakpos2348
gpeakpos2417	CAR	CAR 12:0	gpeakpos2417
gpeakpos2561	CAR	CAR 13:1	gpeakpos2561
gpeakpos2582	CAR	CAR 13:0	gpeakpos2582
gpeakpos2688	CAR	CAR 14:2	gpeakpos2688
gpeakpos2726	CAR	CAR 14:1	gpeakpos2726
gpeakpos2767	CAR	CAR 14:0	gpeakpos2767
gpeakpos3064	CAR	CAR 16:2	gpeakpos3064
gpeakpos3079	CAR	CAR 16:1	gpeakpos3079
gpeakpos3098	CAR	CAR 16:0	gpeakpos3098
gpeakpos3375	CAR	CAR 18:2	gpeakpos3375
gpeakpos3419	CAR	CAR 18:1	gpeakpos3419
gpeakpos3441	CAR	CAR 18:0	gpeakpos3441
gpeakpos6622	CE	CE 18:3	gpeakpos6622
gpeakpos6657	CE	CE 18:2	gpeakpos6657
gpeakpos7122	CE	CE 20:4	gpeakpos7122
gpeakpos7158	CE	CE 20:3	gpeakpos7158
gpeakpos7549	CE	CE 22:6	gpeakpos7549
gpeakpos7586	CE	CE 22:5	gpeakpos7586
gpeakpos4442	LPC_P	LPC_P 18:1	gpeakpos4442
gpeakpos4173	LPC_P	LPC_P 16:0	gpeakpos4173
gpeakpos4188	LPC_O	LPC_O 16:0	gpeakpos4188
gpeakpos4465	LPC_O	LPC_O 18:1	gpeakpos4465
gpeakpos4494	LPC_O	LPC_O 18:0	gpeakpos4494
gpeakpos5151	LPC_O	LPC_O 22:1	gpeakpos5151
gpeakpos5531	LPC_O	LPC_O 24:1	gpeakpos5531
gpeakpos5562	LPC_O	LPC_O 24:0	gpeakpos5562
gpeakpos5917	LPC_O	LPC_O 26:1	gpeakpos5917
gpeakneg4189	PC_P	PC_P 32:1	gpeakneg4189
gpeakneg4215	PC_P	PC_P 32:0	gpeakneg4215
gpeakneg4417	PC_P	PC_P 34:3	gpeakneg4417
gpeakneg4439	PC_P	PC_P 34:2	gpeakneg4439
gpeakneg4457	PC_P	PC_P 34:1	gpeakneg4457
gpeakneg4477	PC_P	PC_P 34:0	gpeakneg4477
gpeakneg4581	PC_P	PC_P 35:2	gpeakneg4581
gpeakneg4632	PC_P	PC_P 36:5	gpeakneg4632
gpeakneg4687	PC_P	PC_P 36:2	gpeakneg4687
gpeakneg4707	PC_P	PC_P 36:1	gpeakneg4707
gpeakneg4783	PC_P	PC_P 37:4	gpeakneg4783
gpeakneg4835	PC_P	PC_P 37:1	gpeakneg4835
gpeakneg4867	PC_P	PC_P 38:6	gpeakneg4867
gpeakneg4889	PC_P	PC_P 38:5	gpeakneg4889
gpeakneg4888	PC_P	PC_P 38:5	gpeakneg4888
gpeakneg4907	PC_P	PC_P 38:4	gpeakneg4907
gpeakneg5123	PC_P	PC_P 40:7	gpeakneg5123
gpeakneg5161	PC_P	PC_P 40:5	gpeakneg5161
gpeakneg5189	PC_P	PC_P 40:3	gpeakneg5189
gpeakneg5363	PC_P	PC_P 42:5	gpeakneg5363
gpeakneg5385	PC_P	PC_P 42:3	gpeakneg5385
gpeakneg5503	PC_P	PC_P 44:7	gpeakneg5503
gpeakneg5513	PC_P	PC_P 44:6	gpeakneg5513
gpeakneg5524	PC_P	PC_P 44:5	gpeakneg5524
gpeakneg5547	PC_P	PC_P 44:3	gpeakneg5547
gpeakneg5647	PC_P	PC_P 46:8	gpeakneg5647
gpeakneg4244	PC_O	PC_O 32:0	gpeakneg4244
gpeakneg4456	PC_O	PC_O 34:2	gpeakneg4456
gpeakneg4476	PC_O	PC_O 34:1	gpeakneg4476
gpeakneg4501	PC_O	PC_O 34:0	gpeakneg4501
gpeakneg4671	PC_O	PC_O 36:4	gpeakneg4671
gpeakneg4706	PC_O	PC_O 36:2	gpeakneg4706
gpeakneg4724	PC_O	PC_O 36:1	gpeakneg4724
gpeakneg4798	PC_O	PC_O 37:4	gpeakneg4798
gpeakneg4906	PC_O	PC_O 38:5	gpeakneg4906
gpeakneg4920	PC_O	PC_O 38:4	gpeakneg4920
gpeakneg4939	PC_O	PC_O 38:3	gpeakneg4939
gpeakneg4960	PC_O	PC_O 38:2	gpeakneg4960
gpeakneg5145	PC_O	PC_O 40:7	gpeakneg5145
gpeakneg5173	PC_O	PC_O 40:5	gpeakneg5173
gpeakneg5174	PC_O	PC_O 40:5	gpeakneg5174
gpeakneg5190	PC_O	PC_O 40:4	gpeakneg5190
gpeakneg5191	PC_O	PC_O 40:4	gpeakneg5191
gpeakneg5209	PC_O	PC_O 40:3	gpeakneg5209
gpeakneg5352	PC_O	PC_O 42:7	gpeakneg5352
gpeakneg5361	PC_O	PC_O 42:6	gpeakneg5361
gpeakneg5373	PC_O	PC_O 42:5	gpeakneg5373
gpeakneg5386	PC_O	PC_O 42:4	gpeakneg5386
gpeakneg5400	PC_O	PC_O 42:3	gpeakneg5400
gpeakneg5416	PC_O	PC_O 42:2	gpeakneg5416
gpeakneg5502	PC_O	PC_O 44:8	gpeakneg5502
gpeakneg5512	PC_O	PC_O 44:7	gpeakneg5512
gpeakneg5546	PC_O	PC_O 44:4	gpeakneg5546
gpeakneg5660	PC_O	PC_O 46:8	gpeakneg5660
gpeakneg5675	PC_O	PC_O 46:7	gpeakneg5675
gpeakneg5691	PC_O	PC_O 46:6	gpeakneg5691
gpeakneg5701	PC_O	PC_O 46:5	gpeakneg5701
gpeakneg2637	dCer	dCer 32:1	gpeakneg2637
gpeakneg2747	dCer	dCer 34:2	gpeakneg2747
gpeakneg2765	dCer	dCer 34:1	gpeakneg2765
gpeakneg2886	dCer	dCer 36:2	gpeakneg2886
gpeakneg2895	dCer	dCer 36:1	gpeakneg2895
gpeakneg3053	dCer	dCer 38:1	gpeakneg3053
gpeakneg3252	dCer	dCer 40:3	gpeakneg3252
gpeakneg3264	dCer	dCer 40:2	gpeakneg3264
gpeakneg3276	dCer	dCer 40:1	gpeakneg3276
gpeakneg3402	dCer	dCer 41:1	gpeakneg3402
gpeakneg3514	dCer	dCer 42:4	gpeakneg3514
gpeakneg3531	dCer	dCer 42:3	gpeakneg3531
gpeakneg3543	dCer	dCer 42:2	gpeakneg3543
gpeakneg3566	dCer	dCer 42:1	gpeakneg3566
gpeakneg3666	dCer	dCer 43:3	gpeakneg3666
gpeakneg3685	dCer	dCer 43:2	gpeakneg3685
gpeakneg3687	dCer	dCer 43:2	gpeakneg3687
gpeakneg3714	dCer	dCer 43:1	gpeakneg3714
gpeakneg3839	dCer	dCer 44:2	gpeakneg3839
gpeakneg3840	dCer	dCer 44:2	gpeakneg3840
gpeakneg4081	PC	PC 30:1	gpeakneg4081
gpeakneg4106	PC	PC 30:0	gpeakneg4106
gpeakneg4323	PC	PC 32:2	gpeakneg4323
gpeakneg4342	PC	PC 32:1	gpeakneg4342
gpeakneg4363	PC	PC 32:0	gpeakneg4363
gpeakneg4454	PC	PC 33:2	gpeakneg4454
gpeakneg4472	PC	PC 33:1	gpeakneg4472
gpeakneg4494	PC	PC 33:0	gpeakneg4494
gpeakneg4563	PC	PC 34:4	gpeakneg4563
gpeakneg4579	PC	PC 34:3	gpeakneg4579
gpeakneg4580	PC	PC 34:3	gpeakneg4580
gpeakneg4593	PC	PC 34:2	gpeakneg4593
gpeakneg4606	PC	PC 34:1	gpeakneg4606
gpeakneg4623	PC	PC 34:0	gpeakneg4623
gpeakneg4667	PC	PC 35:4	gpeakneg4667
gpeakneg4684	PC	PC 35:3	gpeakneg4684
gpeakneg4702	PC	PC 35:2	gpeakneg4702
gpeakneg4721	PC	PC 35:1	gpeakneg4721
gpeakneg4781	PC	PC 36:5	gpeakneg4781
gpeakneg4782	PC	PC 36:5	gpeakneg4782
gpeakneg4796	PC	PC 36:4	gpeakneg4796
gpeakneg4797	PC	PC 36:4	gpeakneg4797
gpeakneg4811	PC	PC 36:3	gpeakneg4811
gpeakneg4831	PC	PC 36:2	gpeakneg4831
gpeakneg4849	PC	PC 36:1	gpeakneg4849
gpeakneg4872	PC	PC 36:0	gpeakneg4872
gpeakneg4904	PC	PC 37:5	gpeakneg4904
gpeakneg4958	PC	PC 37:2	gpeakneg4958
gpeakneg5040	PC	PC 38:5	gpeakneg5040
gpeakneg5055	PC	PC 38:4	gpeakneg5055
gpeakneg5056	PC	PC 38:4	gpeakneg5056
gpeakneg5079	PC	PC 38:3	gpeakneg5079
gpeakneg5106	PC	PC 38:2	gpeakneg5106
gpeakneg5107	PC	PC 38:2	gpeakneg5107
gpeakneg5127	PC	PC 38:1	gpeakneg5127
gpeakneg5187	PC	PC 39:4	gpeakneg5187
gpeakneg5207	PC	PC 39:3	gpeakneg5207
gpeakneg5292	PC	PC 40:5	gpeakneg5292
gpeakneg5307	PC	PC 40:4	gpeakneg5307
gpeakneg5322	PC	PC 40:3	gpeakneg5322
gpeakneg5323	PC	PC 40:3	gpeakneg5323
gpeakneg5336	PC	PC 40:2	gpeakneg5336
gpeakneg5410	PC	PC 42:9	gpeakneg5410
gpeakneg5450	PC	PC 42:6	gpeakneg5450
gpeakneg5459	PC	PC 42:5	gpeakneg5459
gpeakneg5470	PC	PC 42:4	gpeakneg5470
gpeakneg3534	dSM	dSM 30:1	gpeakneg3534
gpeakneg3819	dSM	dSM 32:2	gpeakneg3819
gpeakneg3846	dSM	dSM 32:0	gpeakneg3846
gpeakneg3944	dSM	dSM 33:2	gpeakneg3944
gpeakneg3966	dSM	dSM 33:1	gpeakneg3966
gpeakneg4047	dSM	dSM 34:3	gpeakneg4047
gpeakneg4062	dSM	dSM 34:2	gpeakneg4062
gpeakneg4077	dSM	dSM 34:1	gpeakneg4077
gpeakneg4181	dSM	dSM 35:2	gpeakneg4181
gpeakneg4200	dSM	dSM 35:1	gpeakneg4200
gpeakneg4292	dSM	dSM 36:4	gpeakneg4292
gpeakneg4304	dSM	dSM 36:3	gpeakneg4304
gpeakneg4319	dSM	dSM 36:2	gpeakneg4319
gpeakneg4333	dSM	dSM 36:1	gpeakneg4333
gpeakneg4448	dSM	dSM 37:2	gpeakneg4448
gpeakneg4574	dSM	dSM 38:3	gpeakneg4574
gpeakneg4588	dSM	dSM 38:2	gpeakneg4588
gpeakneg4698	dSM	dSM 39:2	gpeakneg4698
gpeakneg4715	dSM	dSM 39:1	gpeakneg4715
gpeakneg4805	dSM	dSM 40:3	gpeakneg4805
gpeakneg4821	dSM	dSM 40:2	gpeakneg4821
gpeakneg4929	dSM	dSM 41:3	gpeakneg4929
gpeakneg4953	dSM	dSM 41:2	gpeakneg4953
gpeakneg5034	dSM	dSM 42:5	gpeakneg5034
gpeakneg5049	dSM	dSM 42:4	gpeakneg5049
gpeakneg5070	dSM	dSM 42:3	gpeakneg5070
gpeakneg5093	dSM	dSM 42:2	gpeakneg5093
gpeakneg5218	dSM	dSM 43:2	gpeakneg5218
gpeakneg5285	dSM	dSM 44:5	gpeakneg5285
gpeakneg5302	dSM	dSM 44:4	gpeakneg5302
gpeakneg5316	dSM	dSM 44:3	gpeakneg5316
gpeakneg5331	dSM	dSM 44:2	gpeakneg5331
gpeakneg163	FA	FA 8:0	gpeakneg163
gpeakneg291	FA	FA 10:3	gpeakneg291
gpeakneg300	FA	FA 10:2	gpeakneg300
gpeakneg305	FA	FA 10:1	gpeakneg305
gpeakneg349	FA	FA 11:1	gpeakneg349
gpeakneg372	FA	FA 12:3	gpeakneg372
gpeakneg378	FA	FA 12:2	gpeakneg378
gpeakneg384	FA	FA 12:1	gpeakneg384
gpeakneg391	FA	FA 12:0	gpeakneg391
gpeakneg437	FA	FA 13:1	gpeakneg437
gpeakneg451	FA	FA 13:0	gpeakneg451
gpeakneg574	FA	FA 14:2	gpeakneg574
gpeakneg588	FA	FA 14:1	gpeakneg588
gpeakneg596	FA	FA 14:0	gpeakneg596
gpeakneg731	FA	FA 15:1	gpeakneg731
gpeakneg828	FA	FA 16:2	gpeakneg828
gpeakneg838	FA	FA 16:1	gpeakneg838
gpeakneg852	FA	FA 16:0	gpeakneg852
gpeakneg892	FA	FA 17:2	gpeakneg892
gpeakneg902	FA	FA 17:1	gpeakneg902
gpeakneg910	FA	FA 17:0	gpeakneg910
gpeakneg925	FA	FA 18:4	gpeakneg925
gpeakneg935	FA	FA 18:3	gpeakneg935
gpeakneg940	FA	FA 18:2	gpeakneg940
gpeakneg954	FA	FA 18:1	gpeakneg954
gpeakneg1109	FA	FA 19:1	gpeakneg1109
gpeakneg1173	FA	FA 20:5	gpeakneg1173
gpeakneg1180	FA	FA 20:4	gpeakneg1180
gpeakneg1214	FA	FA 20:3	gpeakneg1214
gpeakneg1228	FA	FA 20:2	gpeakneg1228
gpeakneg1241	FA	FA 20:1	gpeakneg1241
gpeakneg1346	FA	FA 21:1	gpeakneg1346
gpeakneg1373	FA	FA 22:6	gpeakneg1373
gpeakneg1382	FA	FA 22:5	gpeakneg1382
gpeakneg1395	FA	FA 22:3	gpeakneg1395
gpeakneg1403	FA	FA 22:2	gpeakneg1403
gpeakneg1412	FA	FA 22:1	gpeakneg1412
gpeakneg1472	FA	FA 23:1	gpeakneg1472
gpeakneg1488	FA	FA 23:0	gpeakneg1488
gpeakneg1506	FA	FA 24:5	gpeakneg1506
gpeakneg1516	FA	FA 24:4	gpeakneg1516
gpeakneg1533	FA	FA 24:3	gpeakneg1533
gpeakneg1541	FA	FA 24:2	gpeakneg1541
gpeakneg1580	FA	FA 24:1	gpeakneg1580
gpeakneg1638	FA	FA 25:3	gpeakneg1638
gpeakneg1645	FA	FA 25:2	gpeakneg1645
gpeakneg1652	FA	FA 25:1	gpeakneg1652
gpeakneg1661	FA	FA 25:0	gpeakneg1661
gpeakneg1677	FA	FA 26:5	gpeakneg1677
gpeakneg1699	FA	FA 26:4	gpeakneg1699
gpeakneg1723	FA	FA 26:2	gpeakneg1723
gpeakneg1722	FA	FA 26:2	gpeakneg1722
gpeakneg1737	FA	FA 26:1	gpeakneg1737
gpeakneg1778	FA	FA 27:4	gpeakneg1778
gpeakneg1793	FA	FA 27:3	gpeakneg1793
gpeakneg1860	FA	FA 28:4	gpeakneg1860
gpeakneg3735	PE_P	PE_P 36:3	gpeakneg3735
gpeakneg3953	PE_P	PE_P 38:6	gpeakneg3953
gpeakneg4151	PE_P	PE_P 40:8	gpeakneg4151
gpeakneg4172	PE_P	PE_P 40:7	gpeakneg4172
gpeakneg4669	PE_P	PE_P 44:8	gpeakneg4669
gpeakneg3463	PE_P	PE_P 34:2	gpeakneg3463
gpeakneg3495	PE_P	PE_P 34:1	gpeakneg3495
gpeakneg3609	PE_P	PE_P 35:2	gpeakneg3609
gpeakneg3680	PE_P	PE_P 36:5	gpeakneg3680
gpeakneg3706	PE_P	PE_P 36:4	gpeakneg3706
gpeakneg3762	PE_P	PE_P 36:2	gpeakneg3762
gpeakneg3824	PE_P	PE_P 37:6	gpeakneg3824
gpeakneg3836	PE_P	PE_P 37:5	gpeakneg3836
gpeakneg3855	PE_P	PE_P 37:4	gpeakneg3855
gpeakneg3952	PE_P	PE_P 38:6	gpeakneg3952
gpeakneg3974	PE_P	PE_P 38:5	gpeakneg3974
gpeakneg3993	PE_P	PE_P 38:4	gpeakneg3993
gpeakneg3994	PE_P	PE_P 38:4	gpeakneg3994
gpeakneg4014	PE_P	PE_P 38:3	gpeakneg4014
gpeakneg4069	PE_P	PE_P 39:6	gpeakneg4069
gpeakneg4187	PE_P	PE_P 40:6	gpeakneg4187
gpeakneg4210	PE_P	PE_P 40:5	gpeakneg4210
gpeakneg4239	PE_P	PE_P 40:4	gpeakneg4239
gpeakneg4438	PE_P	PE_P 42:7	gpeakneg4438
gpeakneg4474	PE_P	PE_P 42:5	gpeakneg4474
gpeakneg4685	PE_P	PE_P 44:7	gpeakneg4685
gpeakneg2026	LPE	LPE 16:1	gpeakneg2026
gpeakneg2039	LPE	LPE 16:0	gpeakneg2039
gpeakneg2174	LPE	LPE 18:3	gpeakneg2174
gpeakneg2200	LPE	LPE 18:2	gpeakneg2200
gpeakneg2206	LPE	LPE 18:1	gpeakneg2206
gpeakneg2319	LPE	LPE 20:5	gpeakneg2319
gpeakneg2333	LPE	LPE 20:4	gpeakneg2333
gpeakneg2339	LPE	LPE 20:3	gpeakneg2339
gpeakneg2428	LPE	LPE 22:5	gpeakneg2428
gpeakneg2429	LPC	LPC 14:0	gpeakneg2429
gpeakneg2515	LPC	LPC 15:0	gpeakneg2515
gpeakneg2552	LPC	LPC 16:1	gpeakneg2552
gpeakneg2559	LPC	LPC 16:0	gpeakneg2559
gpeakneg2635	LPC	LPC 17:0	gpeakneg2635
gpeakneg2660	LPC	LPC 18:3	gpeakneg2660
gpeakneg2668	LPC	LPC 18:2	gpeakneg2668
gpeakneg2680	LPC	LPC 18:1	gpeakneg2680
gpeakneg2698	LPC	LPC 18:0	gpeakneg2698
gpeakneg2744	LPC	LPC 19:1	gpeakneg2744
gpeakneg2762	LPC	LPC 19:0	gpeakneg2762
gpeakneg2787	LPC	LPC 20:5	gpeakneg2787
gpeakneg2795	LPC	LPC 20:4	gpeakneg2795
gpeakneg2811	LPC	LPC 20:2	gpeakneg2811
gpeakneg2822	LPC	LPC 20:1	gpeakneg2822
gpeakneg2832	LPC	LPC 20:0	gpeakneg2832
gpeakneg2900	LPC	LPC 22:6	gpeakneg2900
gpeakneg2914	LPC	LPC 22:5	gpeakneg2914
gpeakneg2927	LPC	LPC 22:4	gpeakneg2927
gpeakneg3029	DAG	DAG 34:3	gpeakneg3029
gpeakneg3071	DAG	DAG 34:1	gpeakneg3071
gpeakneg3239	DAG	DAG 36:5	gpeakneg3239
gpeakneg3247	DAG	DAG 36:4	gpeakneg3247
gpeakneg3257	DAG	DAG 36:3	gpeakneg3257
gpeakneg3268	DAG	DAG 36:2	gpeakneg3268
gpeakneg3285	DAG	DAG 36:1	gpeakneg3285
gpeakneg3625	PE	PE 34:2	gpeakneg3625
gpeakneg3647	PE	PE 34:1	gpeakneg3647
gpeakneg3786	PE	PE 35:2	gpeakneg3786
gpeakneg3852	PE	PE 36:5	gpeakneg3852
gpeakneg3872	PE	PE 36:4	gpeakneg3872
gpeakneg3892	PE	PE 36:3	gpeakneg3892
gpeakneg3913	PE	PE 36:2	gpeakneg3913
gpeakneg3935	PE	PE 36:1	gpeakneg3935
gpeakneg4012	PE	PE 37:4	gpeakneg4012
gpeakneg4079	PE	PE 38:6	gpeakneg4079
gpeakneg4101	PE	PE 38:5	gpeakneg4101
gpeakneg4124	PE	PE 38:4	gpeakneg4124
gpeakneg4141	PE	PE 38:3	gpeakneg4141
gpeakneg4321	PE	PE 40:7	gpeakneg4321
gpeakneg4339	PE	PE 40:6	gpeakneg4339
gpeakneg4359	PE	PE 40:5	gpeakneg4359
gpeakneg4360	PE	PE 40:5	gpeakneg4360
gpeakneg4380	PE	PE 40:4	gpeakneg4380

## Sheet: 03_n_lipid
	standard_cov	diagnosis_cov	medication_cov
gpeakpos1999	428	428	428
gpeakpos2041	428	428	428
gpeakpos2069	424	424	424
gpeakpos2099	424	424	424
gpeakpos2229	425	425	425
gpeakpos2348	422	422	422
gpeakpos2417	424	424	424
gpeakpos2561	423	423	423
gpeakpos2582	423	423	423
gpeakpos2688	426	426	426
gpeakpos2726	423	423	423
gpeakpos2767	423	423	423
gpeakpos3064	427	427	427
gpeakpos3098	427	427	427
gpeakpos3375	425	425	425
gpeakpos3419	426	426	426
gpeakpos3441	428	428	428
gpeakpos4188	422	422	422
gpeakpos4442	424	424	424
gpeakpos4465	423	423	423
gpeakpos4494	425	425	425
gpeakpos5151	424	424	424
gpeakpos5531	426	426	426
gpeakpos5562	423	423	423
gpeakpos5917	425	425	425
gpeakpos6622	422	422	422
gpeakpos7122	425	425	425
gpeakpos7158	422	422	422
gpeakpos7470	427	427	427
gpeakpos7514	427	427	427
gpeakpos7549	426	426	426
gpeakpos7586	423	423	423
gpeakpos7730	428	428	428
gpeakpos7769	427	427	427
gpeakpos7961	426	426	426
gpeakpos7997	427	427	427
gpeakpos8043	427	427	427
gpeakpos8324	426	426	426
gpeakpos8631	426	426	426
gpeakpos8679	426	426	426
gpeakpos8733	424	424	424
gpeakpos9000	426	426	426
gpeakpos9264	426	426	426
gpeakpos9328	426	426	426
gpeakpos9390	425	425	425
gpeakpos9446	424	424	424
gpeakpos9505	423	423	423
gpeakpos9794	427	427	427
gpeakpos9863	426	426	426
gpeakpos9918	427	427	427
gpeakpos10107	425	425	425
gpeakpos10171	426	426	426
gpeakpos10236	425	425	425
gpeakpos10371	426	426	426
gpeakpos10445	420	420	420
gpeakpos10660	426	426	426
gpeakpos10723	427	427	427
gpeakpos10860	426	426	426
gpeakpos10926	425	425	425
gpeakpos11003	425	425	425
gpeakpos11076	427	427	427
gpeakpos11134	426	426	426
gpeakpos11200	426	426	426
gpeakpos11253	426	426	426
gpeakpos11314	427	427	427
gpeakpos11389	422	422	422
gpeakpos11522	425	425	425
gpeakpos11585	425	425	425
gpeakpos11639	426	426	426
gpeakpos11690	427	427	427
gpeakpos11823	426	426	426
gpeakpos11828	423	423	423
gpeakpos11905	427	427	427
gpeakpos11964	426	426	426
gpeakpos12022	426	426	426
gpeakpos12080	426	426	426
gpeakpos12125	428	428	428
gpeakpos12192	427	427	427
gpeakpos12323	426	426	426
gpeakpos12430	425	425	425
gpeakpos12484	427	427	427
gpeakpos12743	425	425	425
gpeakpos12792	426	426	426
gpeakpos12841	426	426	426
gpeakpos12892	426	426	426
gpeakpos12955	428	428	428
gpeakpos13012	425	425	425
gpeakpos13066	426	426	426
gpeakpos13118	426	426	426
gpeakpos13174	426	426	426
gpeakpos13342	426	426	426
gpeakpos13459	426	426	426
gpeakpos13500	427	427	427
gpeakpos13549	427	427	427
gpeakpos13594	424	424	424
gpeakpos13728	425	425	425
gpeakpos13775	426	426	426
gpeakpos13980	425	425	425
gpeakpos14026	426	426	426
gpeakpos14078	426	426	426
gpeakpos14294	424	424	424
gpeakneg291	427	427	427
gpeakneg300	426	426	426
gpeakneg372	426	426	426
gpeakneg378	427	427	427
gpeakneg391	423	423	423
gpeakneg437	423	423	423
gpeakneg451	421	421	421
gpeakneg731	423	423	423
gpeakneg1173	422	422	422
gpeakneg1346	425	425	425
gpeakneg1472	425	425	425
gpeakneg1488	424	424	424
gpeakneg1516	426	426	426
gpeakneg1533	425	425	425
gpeakneg1541	422	422	422
gpeakneg1580	424	424	424
gpeakneg1638	426	426	426
gpeakneg1645	420	420	420
gpeakneg1652	423	423	423
gpeakneg1661	425	425	425
gpeakneg1677	423	423	423
gpeakneg1699	422	422	422
gpeakneg1723	420	420	420
gpeakneg1722	423	423	423
gpeakneg1737	420	420	420
gpeakneg1778	425	425	425
gpeakneg1793	423	423	423
gpeakneg1860	424	424	424
gpeakneg2026	423	423	423
gpeakneg2039	425	425	425
gpeakneg2174	428	428	428
gpeakneg2200	428	428	428
gpeakneg2206	427	427	427
gpeakneg2319	428	428	428
gpeakneg2333	424	424	424
gpeakneg2339	422	422	422
gpeakneg2428	426	426	426
gpeakneg2429	424	424	424
gpeakneg2515	425	425	425
gpeakneg2552	424	424	424
gpeakneg2559	421	421	421
gpeakneg2635	425	425	425
gpeakneg2637	424	424	424
gpeakneg2660	425	425	425
gpeakneg2668	427	427	427
gpeakneg2680	424	424	424
gpeakneg2698	421	421	421
gpeakneg2744	424	424	424
gpeakneg2747	423	423	423
gpeakneg2762	424	424	424
gpeakneg2765	425	425	425
gpeakneg2787	427	427	427
gpeakneg2795	424	424	424
gpeakneg2811	423	423	423
gpeakneg2822	425	425	425
gpeakneg2832	422	422	422
gpeakneg2886	426	426	426
gpeakneg2895	426	426	426
gpeakneg2900	426	426	426
gpeakneg2914	426	426	426
gpeakneg2927	427	427	427
gpeakneg3029	425	425	425
gpeakneg3053	424	424	424
gpeakneg3071	425	425	425
gpeakneg3239	427	427	427
gpeakneg3247	423	423	423
gpeakneg3252	425	425	425
gpeakneg3257	425	425	425
gpeakneg3264	423	423	423
gpeakneg3268	426	426	426
gpeakneg3276	425	425	425
gpeakneg3285	425	425	425
gpeakneg3402	424	424	424
gpeakneg3463	426	426	426
gpeakneg3495	428	428	428
gpeakneg3514	425	425	425
gpeakneg3531	425	425	425
gpeakneg3534	425	425	425
gpeakneg3543	425	425	425
gpeakneg3566	423	423	423
gpeakneg3609	423	423	423
gpeakneg3625	427	427	427
gpeakneg3647	427	427	427
gpeakneg3666	423	423	423
gpeakneg3680	427	427	427
gpeakneg3685	425	425	425
gpeakneg3687	426	426	426
gpeakneg3706	427	427	427
gpeakneg3714	426	426	426
gpeakneg3735	427	427	427
gpeakneg3762	427	427	427
gpeakneg3786	422	422	422
gpeakneg3819	424	424	424
gpeakneg3824	423	423	423
gpeakneg3836	424	424	424
gpeakneg3839	422	422	422
gpeakneg3840	426	426	426
gpeakneg3846	425	425	425
gpeakneg3852	426	426	426
gpeakneg3855	426	426	426
gpeakneg3872	428	428	428
gpeakneg3892	427	427	427
gpeakneg3913	428	428	428
gpeakneg3935	428	428	428
gpeakneg3944	425	425	425
gpeakneg3952	426	426	426
gpeakneg3953	427	427	427
gpeakneg3966	426	426	426
gpeakneg3974	426	426	426
gpeakneg3993	425	425	425
gpeakneg3994	422	422	422
gpeakneg4012	427	427	427
gpeakneg4014	425	425	425
gpeakneg4047	423	423	423
gpeakneg4062	424	424	424
gpeakneg4069	425	425	425
gpeakneg4077	421	421	421
gpeakneg4079	428	428	428
gpeakneg4081	427	427	427
gpeakneg4101	427	427	427
gpeakneg4106	424	424	424
gpeakneg4124	428	428	428
gpeakneg4141	427	427	427
gpeakneg4151	425	425	425
gpeakneg4172	426	426	426
gpeakneg4181	423	423	423
gpeakneg4187	425	425	425
gpeakneg4189	425	425	425
gpeakneg4200	426	426	426
gpeakneg4210	424	424	424
gpeakneg4215	426	426	426
gpeakneg4239	426	426	426
gpeakneg4244	426	426	426
gpeakneg4292	423	423	423
gpeakneg4304	425	425	425
gpeakneg4319	427	427	427
gpeakneg4321	426	426	426
gpeakneg4323	426	426	426
gpeakneg4333	420	420	420
gpeakneg4339	427	427	427
gpeakneg4342	425	425	425
gpeakneg4359	427	427	427
gpeakneg4360	428	428	428
gpeakneg4363	423	423	423
gpeakneg4380	426	426	426
gpeakneg4417	423	423	423
gpeakneg4438	426	426	426
gpeakneg4439	424	424	424
gpeakneg4448	423	423	423
gpeakneg4454	424	424	424
gpeakneg4456	426	426	426
gpeakneg4457	426	426	426
gpeakneg4472	424	424	424
gpeakneg4474	426	426	426
gpeakneg4476	427	427	427
gpeakneg4477	425	425	425
gpeakneg4494	427	427	427
gpeakneg4501	423	423	423
gpeakneg4563	424	424	424
gpeakneg4574	424	424	424
gpeakneg4579	424	424	424
gpeakneg4580	424	424	424
gpeakneg4581	422	422	422
gpeakneg4588	425	425	425
gpeakneg4593	422	422	422
gpeakneg4606	426	426	426
gpeakneg4623	424	424	424
gpeakneg4632	428	428	428
gpeakneg4667	425	425	425
gpeakneg4669	423	423	423
gpeakneg4671	426	426	426
gpeakneg4684	425	425	425
gpeakneg4685	426	426	426
gpeakneg4687	424	424	424
gpeakneg4698	426	426	426
gpeakneg4702	425	425	425
gpeakneg4706	426	426	426
gpeakneg4707	425	425	425
gpeakneg4715	423	423	423
gpeakneg4721	427	427	427
gpeakneg4724	423	423	423
gpeakneg4781	427	427	427
gpeakneg4782	426	426	426
gpeakneg4783	425	425	425
gpeakneg4797	424	424	424
gpeakneg4798	423	423	423
gpeakneg4805	427	427	427
gpeakneg4811	425	425	425
gpeakneg4821	423	423	423
gpeakneg4831	421	421	421
gpeakneg4835	424	424	424
gpeakneg4849	424	424	424
gpeakneg4867	425	425	425
gpeakneg4872	419	419	419
gpeakneg4889	427	427	427
gpeakneg4888	422	422	422
gpeakneg4904	423	423	423
gpeakneg4906	426	426	426
gpeakneg4907	425	425	425
gpeakneg4920	426	426	426
gpeakneg4929	420	420	420
gpeakneg4939	424	424	424
gpeakneg4953	423	423	423
gpeakneg4958	423	423	423
gpeakneg4960	425	425	425
gpeakneg5034	426	426	426
gpeakneg5040	418	418	418
gpeakneg5049	427	427	427
gpeakneg5055	426	426	426
gpeakneg5056	426	426	426
gpeakneg5070	427	427	427
gpeakneg5079	423	423	423
gpeakneg5093	425	425	425
gpeakneg5106	425	425	425
gpeakneg5107	423	423	423
gpeakneg5123	422	422	422
gpeakneg5127	421	421	421
gpeakneg5145	427	427	427
gpeakneg5161	421	421	421
gpeakneg5173	425	425	425
gpeakneg5174	424	424	424
gpeakneg5187	424	424	424
gpeakneg5189	425	425	425
gpeakneg5190	424	424	424
gpeakneg5191	419	419	419
gpeakneg5207	423	423	423
gpeakneg5209	424	424	424
gpeakneg5218	424	424	424
gpeakneg5285	421	421	421
gpeakneg5292	426	426	426
gpeakneg5302	425	425	425
gpeakneg5307	424	424	424
gpeakneg5316	425	425	425
gpeakneg5322	417	417	417
gpeakneg5323	423	423	423
gpeakneg5331	424	424	424
gpeakneg5336	421	421	421
gpeakneg5361	426	426	426
gpeakneg5363	424	424	424
gpeakneg5373	426	426	426
gpeakneg5385	425	425	425
gpeakneg5386	424	424	424
gpeakneg5400	425	425	425
gpeakneg5410	426	426	426
gpeakneg5416	424	424	424
gpeakneg5450	423	423	423
gpeakneg5459	424	424	424
gpeakneg5470	422	422	422
gpeakneg5502	422	422	422
gpeakneg5503	418	418	418
gpeakneg5513	425	425	425
gpeakneg5512	427	427	427
gpeakneg5524	425	425	425
gpeakneg5547	425	425	425
gpeakneg5546	424	424	424
gpeakneg5647	422	422	422
gpeakneg5660	425	425	425
gpeakneg5675	424	424	424
gpeakneg5691	424	424	424
gpeakneg5701	426	426	426

## Sheet: 04_n_prs
	standard_cov	diagnosis_cov	bmi_cov
ADHD_PRS	1190	1190	1190
ASD_PRS	1190	1190	1190
Education_PRS	1190	1190	1190
SCZ_PRS	1190	1190	1190
Agreeableness_PRS	1190	1190	1190
Alzheimer_PRS	1190	1190	1190
Conscientiousness_PRS	1190	1190	1190
Extraversion_PRS	1190	1190	1190
MDD_PRS	1190	1190	1190
Neuroticism_PRS	1190	1190	1190
Openness_PRS	1190	1190	1190
SleepDurationLong_PRS	1190	1190	1190
SleepDurationShort_PRS	1190	1190	1190
BD_PRS	1190	1190	1190
Lipid_BD_PRS	1190	1190	1190
Lipid_SCZ_PRS	1190	1190	1190
Lipid_MDD_PRS	1190	1190	1190
Lipid_Edu_PRS	1190	1190	1190

## Sheet: 05_prs_std
prs	coef	se	ci_low	ci_high	pval	FDR	log10_FDR
BD_PRS	-0.0220762	0.00679348	-0.0353911	-0.00876117	0.00115564	0.0208016	1.6819
Education_PRS	-0.0176249	0.00663417	-0.0306276	-0.00462213	0.00789143	0.0473486	1.32469
SCZ_PRS	0.0191557	0.00713846	0.00516458	0.0331468	0.00728669	0.0473486	1.32469
ADHD_PRS	0.0112402	0.0065498	-0.00159719	0.0240776	0.0861417	0.311276	0.506855
Agreeableness_PRS	-0.0114022	0.00665103	-0.0244379	0.00163363	0.0864655	0.311276	0.506855
SleepDurationShort_PRS	0.00757522	0.00653108	-0.00522547	0.0203759	0.246101	0.575325	0.240086
Openness_PRS	-0.00679622	0.0065378	-0.0196101	0.00601764	0.29856	0.575325	0.240086
Neuroticism_PRS	0.00889141	0.00694707	-0.0047246	0.0225074	0.200588	0.575325	0.240086
Lipid_Edu_PRS	-0.00686555	0.00689846	-0.0203863	0.00665519	0.319625	0.575325	0.240086
Extraversion_PRS	-0.00752597	0.00665946	-0.0205783	0.00552633	0.258427	0.575325	0.240086
ASD_PRS	-0.00628533	0.00705553	-0.0201139	0.00754326	0.373017	0.610391	0.214392
SleepDurationLong_PRS	0.00382019	0.0063423	-0.0086105	0.0162509	0.546951	0.820427	0.0859601
Lipid_SCZ_PRS	0.00334329	0.00644265	-0.00928407	0.0159706	0.603809	0.836043	0.0777714
Conscientiousness_PRS	0.00178941	0.00638915	-0.0107331	0.0143119	0.779424	0.876852	0.0570735
Alzheimer_PRS	0.00198112	0.00680706	-0.0113605	0.0153227	0.771021	0.876852	0.0570735
MDD_PRS	0.00252104	0.00705454	-0.0113056	0.0163477	0.720819	0.876852	0.0570735
Lipid_MDD_PRS	0.000799214	0.00674637	-0.0124234	0.0140219	0.905699	0.958975	0.0181927
Lipid_BD_PRS	-0.000272594	0.00649995	-0.0130123	0.0124671	0.966548	0.966548	0.0147765

## Sheet: 06_lip_std
lipid	coef	pval	se	ci_low	ci_high	FDR	log10_FDR
gpeakpos1999	0.0076441	0.399335	0.00906979	-0.0101324	0.0254206	0.752072	0.123741
gpeakpos2041	-0.00682463	0.405312	0.008201	-0.0228983	0.00924903	0.752072	0.123741
gpeakpos2069	-0.016496	0.186789	0.0124957	-0.0409871	0.00799506	0.683908	0.165002
gpeakpos2099	-0.0109733	0.310762	0.0108258	-0.0321916	0.0102449	0.708574	0.149615
gpeakpos2229	-0.0131045	0.318601	0.0131395	-0.0388573	0.0126484	0.70997	0.14876
gpeakpos2348	-0.0110532	0.183255	0.00830567	-0.027332	0.00522564	0.682734	0.165748
gpeakpos2417	-0.013306	0.248435	0.0115287	-0.0359018	0.00928991	0.684737	0.164476
gpeakpos2561	-0.00744979	0.516985	0.0114966	-0.0299827	0.0150831	0.771205	0.11283
gpeakpos2582	-0.0203358	0.0256427	0.00911271	-0.0381963	-0.00247516	0.44081	0.355748
gpeakpos2688	-0.0106767	0.204487	0.00841433	-0.0271685	0.00581507	0.683908	0.165002
gpeakpos2726	-0.0149736	0.155934	0.0105531	-0.0356573	0.00571013	0.674355	0.171112
gpeakpos2767	-0.0215802	0.191434	0.0165195	-0.0539579	0.0107974	0.683908	0.165002
gpeakpos3064	-0.0103484	0.116206	0.00658753	-0.0232597	0.00256297	0.674355	0.171112
gpeakpos3098	-0.0181145	0.381457	0.0206972	-0.0586803	0.0224513	0.752072	0.123741
gpeakpos3375	-0.0213552	0.0659007	0.0116118	-0.0441139	0.00140347	0.639158	0.194392
gpeakpos3419	-0.014244	0.406303	0.0171528	-0.0478629	0.0193749	0.752072	0.123741
gpeakpos3441	-0.0295116	0.117049	0.0188298	-0.0664174	0.00739417	0.674355	0.171112
gpeakpos4188	0.00475944	0.888036	0.0338054	-0.0614979	0.0710168	0.942073	0.0259156
gpeakpos4442	-0.0263606	0.194909	0.0203369	-0.0662203	0.013499	0.683908	0.165002
gpeakpos4465	-0.0136697	0.583172	0.0249104	-0.0624932	0.0351537	0.794595	0.0998543
gpeakpos4494	0.00677509	0.743606	0.0207138	-0.0338231	0.0473733	0.883032	0.0540234
gpeakpos5151	0.00642708	0.645419	0.0139678	-0.0209493	0.0338035	0.829168	0.0813574
gpeakpos5531	0.0113763	0.580968	0.0206103	-0.0290191	0.0517717	0.794595	0.0998543
gpeakpos5562	0.00860017	0.642357	0.0185187	-0.0276957	0.0448961	0.828182	0.0818742
gpeakpos5917	0.00308234	0.845062	0.0157726	-0.0278315	0.0339961	0.927776	0.0325569
gpeakpos6622	-0.00246247	0.855517	0.0135238	-0.0289686	0.0240437	0.927776	0.0325569
gpeakpos7122	0.00522512	0.809717	0.0216998	-0.0373056	0.0477559	0.925024	0.0338468
gpeakpos7158	0.0191858	0.256054	0.0168924	-0.0139227	0.0522943	0.684737	0.164476
gpeakpos7470	0.00323321	0.452803	0.00430664	-0.00520764	0.0116741	0.752072	0.123741
gpeakpos7514	0.00265474	0.501012	0.00394523	-0.00507777	0.0103872	0.763144	0.117393
gpeakpos7549	0.001592	0.892448	0.0117745	-0.0214857	0.0246697	0.942073	0.0259156
gpeakpos7586	0.036537	0.0407129	0.0178539	0.00154397	0.0715301	0.524906	0.279918
gpeakpos7730	0.00408336	0.398771	0.00483915	-0.0054012	0.0135679	0.752072	0.123741
gpeakpos7769	0.00605258	0.17078	0.00441891	-0.00260832	0.0147135	0.6749	0.170761
gpeakpos7961	0.00161182	0.726655	0.00461077	-0.00742512	0.0106488	0.868618	0.0611712
gpeakpos7997	0.00169103	0.707579	0.0045081	-0.00714468	0.0105267	0.862286	0.0643489
gpeakpos8043	0.00531379	0.213219	0.00426891	-0.00305313	0.0136807	0.684737	0.164476
gpeakpos8324	0.00454693	0.396613	0.00536394	-0.00596619	0.0150601	0.752072	0.123741
gpeakpos8631	0.00409016	0.46048	0.0055418	-0.00677156	0.0149519	0.752072	0.123741
gpeakpos8679	0.00488596	0.353399	0.00526495	-0.00543315	0.0152051	0.752072	0.123741
gpeakpos8733	0.0054579	0.322206	0.00551339	-0.00534815	0.016264	0.713596	0.146547
gpeakpos9000	0.00523319	0.455846	0.00701779	-0.00852141	0.0189878	0.752072	0.123741
gpeakpos9264	0.00603299	0.349403	0.00644724	-0.00660337	0.0186693	0.752072	0.123741
gpeakpos9328	0.00723332	0.256715	0.00637753	-0.0052664	0.019733	0.684737	0.164476
gpeakpos9390	0.00631284	0.357559	0.00686159	-0.00713563	0.0197613	0.752072	0.123741
gpeakpos9446	0.00569204	0.420887	0.00707188	-0.00816858	0.0195527	0.752072	0.123741
gpeakpos9505	0.00589215	0.490794	0.00855117	-0.0108678	0.0226521	0.758281	0.12017
gpeakpos9794	0.00406561	0.605433	0.00786988	-0.0113591	0.0194903	0.812495	0.0901791
gpeakpos9863	0.00686208	0.38181	0.00784627	-0.00851633	0.0222405	0.752072	0.123741
gpeakpos9918	0.00816782	0.269622	0.00739883	-0.00633362	0.0226693	0.692189	0.159775
gpeakpos10107	0.00397778	0.574255	0.00708046	-0.00989968	0.0178552	0.794595	0.0998543
gpeakpos10171	0.00565721	0.433215	0.00721857	-0.00849092	0.0198053	0.752072	0.123741
gpeakpos10236	0.00668366	0.452816	0.00890289	-0.0107657	0.024133	0.752072	0.123741
gpeakpos10371	0.00571392	0.567395	0.00999124	-0.0138686	0.0252964	0.794595	0.0998543
gpeakpos10445	0.00740462	0.631133	0.015422	-0.022822	0.0376312	0.826295	0.0828651
gpeakpos10660	0.00361366	0.695621	0.00923646	-0.0144895	0.0217168	0.858694	0.0661613
gpeakpos10723	0.00810706	0.434329	0.0103697	-0.0122171	0.0284312	0.752072	0.123741
gpeakpos10860	0.0105889	0.277387	0.00974852	-0.00851782	0.0296957	0.696648	0.156987
gpeakpos10926	0.0158813	0.117264	0.010139	-0.00399073	0.0357534	0.674355	0.171112
gpeakpos11003	0.00294351	0.700729	0.00765866	-0.0120672	0.0179542	0.860419	0.0652901
gpeakpos11076	0.00234928	0.785293	0.00862346	-0.0145524	0.019251	0.908624	0.0416159
gpeakpos11134	0.00672629	0.556022	0.0114245	-0.0156653	0.0291179	0.793174	0.100631
gpeakpos11200	0.0130945	0.432943	0.0166986	-0.0196342	0.0458231	0.752072	0.123741
gpeakpos11253	0.0098871	0.579388	0.0178378	-0.0250743	0.0448485	0.794595	0.0998543
gpeakpos11314	0.0127824	0.377887	0.0144958	-0.0156289	0.0411936	0.752072	0.123741
gpeakpos11389	0.00407446	0.749299	0.0127501	-0.0209152	0.0290642	0.883977	0.0535589
gpeakpos11522	0.00238648	0.831245	0.0111986	-0.0195624	0.0243354	0.927776	0.0325569
gpeakpos11585	0.00946803	0.478036	0.0133453	-0.0166883	0.0356244	0.756891	0.120967
gpeakpos11639	0.0158848	0.286192	0.0148942	-0.0133072	0.0450769	0.696648	0.156987
gpeakpos11690	0.0141175	0.309067	0.013879	-0.0130849	0.0413198	0.708574	0.149615
gpeakpos11823	-0.000377307	0.965102	0.00862383	-0.0172797	0.0165251	0.992598	0.00322654
gpeakpos11828	0.00892245	0.421835	0.0111081	-0.0128489	0.0306938	0.752072	0.123741
gpeakpos11905	0.00173219	0.858003	0.00968157	-0.0172433	0.0207077	0.927776	0.0325569
gpeakpos11964	0.00486005	0.696946	0.0124794	-0.0195991	0.0293192	0.858694	0.0661613
gpeakpos12022	0.0149728	0.417653	0.0184736	-0.0212347	0.0511804	0.752072	0.123741
gpeakpos12080	0.0263432	0.359026	0.0287206	-0.0299482	0.0826345	0.752072	0.123741
gpeakpos12125	0.0274256	0.297884	0.0263459	-0.0242114	0.0790626	0.704827	0.151918
gpeakpos12192	0.00609702	0.558213	0.0104134	-0.0143129	0.0265069	0.793174	0.100631
gpeakpos12323	0.00606523	0.526014	0.00956506	-0.0126819	0.0248124	0.775065	0.110662
gpeakpos12430	0.0128954	0.425573	0.0161842	-0.0188251	0.0446159	0.752072	0.123741
gpeakpos12484	0.0205441	0.200881	0.016062	-0.0109369	0.0520251	0.683908	0.165002
gpeakpos12743	0.0113579	0.37138	0.0127061	-0.0135457	0.0362615	0.752072	0.123741
gpeakpos12792	0.0171284	0.28531	0.0160308	-0.0142915	0.0485482	0.696648	0.156987
gpeakpos12841	0.0253977	0.205115	0.0200437	-0.0138873	0.0646827	0.683908	0.165002
gpeakpos12892	0.0328407	0.149808	0.0228027	-0.0118518	0.0775331	0.674355	0.171112
gpeakpos12955	0.020464	0.0579079	0.010791	-0.000685982	0.041614	0.639158	0.194392
gpeakpos13012	0.00180188	0.858385	0.0100985	-0.0179909	0.0215946	0.927776	0.0325569
gpeakpos13066	0.00550603	0.653094	0.0122501	-0.0185037	0.0295158	0.833099	0.0793033
gpeakpos13118	0.00899668	0.580556	0.0162815	-0.0229144	0.0409077	0.794595	0.0998543
gpeakpos13174	0.0147024	0.38045	0.0167632	-0.0181528	0.0475577	0.752072	0.123741
gpeakpos13342	0.00486328	0.622613	0.00988167	-0.0145044	0.024231	0.824846	0.0836272
gpeakpos13459	0.0146243	0.365537	0.0161619	-0.0170524	0.0463011	0.752072	0.123741
gpeakpos13500	0.0207585	0.288635	0.0195628	-0.0175838	0.0591008	0.696648	0.156987
gpeakpos13549	0.0255706	0.129438	0.0168636	-0.00748138	0.0586225	0.674355	0.171112
gpeakpos13594	0.0306226	0.095125	0.0183483	-0.0053394	0.0665846	0.672632	0.172222
gpeakpos13728	0.00503423	0.661009	0.01148	-0.0174662	0.0275347	0.837278	0.0771304
gpeakpos13775	0.00860492	0.507899	0.0129962	-0.0168671	0.0340769	0.766669	0.115392
gpeakpos13980	0.00648595	0.534346	0.0104379	-0.0139719	0.0269438	0.780967	0.107367
gpeakpos14026	0.00826737	0.521449	0.0128953	-0.017007	0.0335418	0.771488	0.112671
gpeakpos14078	0.0118954	0.443063	0.0155083	-0.0185004	0.0422911	0.752072	0.123741
gpeakpos14294	0.025191	0.188823	0.0191702	-0.012382	0.0627639	0.683908	0.165002
gpeakneg291	0.00728176	0.480565	0.010323	-0.0129509	0.0275144	0.757572	0.120576
gpeakneg300	-0.00321411	0.772905	0.0111378	-0.0250438	0.0186156	0.900061	0.0457281
gpeakneg372	0.0121293	0.166342	0.00876363	-0.00504707	0.0293057	0.6749	0.170761
gpeakneg378	-0.00893226	0.572558	0.0158293	-0.0399571	0.0220925	0.794595	0.0998543
gpeakneg391	0.0179305	0.148507	0.0124102	-0.00639298	0.042254	0.674355	0.171112
gpeakneg437	-0.000976639	0.903757	0.00807696	-0.0168072	0.0148539	0.951184	0.0217352
gpeakneg451	-0.00578862	0.691365	0.0145808	-0.0343664	0.0227892	0.858694	0.0661613
gpeakneg731	-0.0166792	0.250951	0.0145284	-0.0451542	0.0117959	0.684737	0.164476
gpeakneg1173	-0.0128095	0.270784	0.0116317	-0.0356072	0.00998821	0.692189	0.159775
gpeakneg1346	0.00186627	0.836546	0.00904576	-0.0158631	0.0195956	0.927776	0.0325569
gpeakneg1472	0.0135235	0.180737	0.0101035	-0.00627908	0.033326	0.682734	0.165748
gpeakneg1488	0.00970683	0.388265	0.0112508	-0.0123443	0.031758	0.752072	0.123741
gpeakneg1516	0.0072099	0.570202	0.012699	-0.0176796	0.0320994	0.794595	0.0998543
gpeakneg1533	0.00963429	0.431754	0.0122544	-0.0143838	0.0336524	0.752072	0.123741
gpeakneg1541	0.000838353	0.959481	0.0165016	-0.0315041	0.0331809	0.989637	0.00452428
gpeakneg1580	0.0172663	0.259859	0.0153243	-0.0127688	0.0473014	0.684737	0.164476
gpeakneg1638	0.0121995	0.0814761	0.0070024	-0.00152498	0.0259239	0.671043	0.17325
gpeakneg1645	0.00741553	0.396963	0.00875445	-0.00974287	0.0245739	0.752072	0.123741
gpeakneg1652	0.0139891	0.131358	0.00927186	-0.00418342	0.0321616	0.674355	0.171112
gpeakneg1661	0.0213062	0.0365668	0.0101916	0.00133106	0.0412813	0.488912	0.31077
gpeakneg1677	0.004517	0.747279	0.014018	-0.0229578	0.0319918	0.883977	0.0535589
gpeakneg1699	0.0239819	0.132632	0.0159475	-0.00727463	0.0552384	0.674355	0.171112
gpeakneg1723	0.0113046	0.341624	0.0118876	-0.0119946	0.0346039	0.742929	0.129053
gpeakneg1722	0.00657044	0.495829	0.00964728	-0.0123379	0.0254788	0.761678	0.118228
gpeakneg1737	0.0117367	0.161388	0.00838086	-0.00468947	0.0281629	0.674355	0.171112
gpeakneg1778	0.00843411	0.159421	0.00599429	-0.00331449	0.0201827	0.674355	0.171112
gpeakneg1793	0.00719332	0.259848	0.00638413	-0.00531934	0.019706	0.684737	0.164476
gpeakneg1860	0.0147168	0.0063365	0.00539108	0.00415047	0.0252831	0.228748	0.640644
gpeakneg2026	-0.00284169	0.721985	0.00798662	-0.0184952	0.0128118	0.865903	0.0625308
gpeakneg2039	-0.00967386	0.532726	0.0155067	-0.0400665	0.0207188	0.780967	0.107367
gpeakneg2174	-0.00652138	0.444902	0.0085365	-0.0232526	0.0102098	0.752072	0.123741
gpeakneg2200	-6.2079e-05	0.995531	0.0110825	-0.0217835	0.0216593	0.995531	0.00194536
gpeakneg2206	0.0072183	0.51182	0.0110034	-0.014348	0.0287846	0.766669	0.115392
gpeakneg2319	-0.00265359	0.784858	0.00972032	-0.0217051	0.0163979	0.908624	0.0416159
gpeakneg2333	0.00206428	0.890884	0.0150474	-0.027428	0.0315566	0.942073	0.0259156
gpeakneg2339	0.000322092	0.977875	0.0116138	-0.0224405	0.0230847	0.994203	0.00252484
gpeakneg2428	0.00517439	0.636531	0.0109498	-0.0162869	0.0266357	0.827817	0.0820654
gpeakneg2429	-0.0234435	0.131728	0.0155531	-0.053927	0.00703997	0.674355	0.171112
gpeakneg2515	-0.0117503	0.477124	0.016528	-0.0441445	0.0206439	0.756891	0.120967
gpeakneg2552	-0.0137666	0.418796	0.0170271	-0.047139	0.0196059	0.752072	0.123741
gpeakneg2559	-0.0355839	0.17332	0.0261337	-0.0868051	0.0156372	0.6749	0.170761
gpeakneg2635	-0.0164252	0.341427	0.0172651	-0.0502642	0.0174139	0.742929	0.129053
gpeakneg2637	0.0249605	0.12773	0.0163878	-0.00715896	0.0570799	0.674355	0.171112
gpeakneg2660	-0.0189302	0.169275	0.0137721	-0.045923	0.00806252	0.6749	0.170761
gpeakneg2668	-0.0222831	0.191627	0.017065	-0.05573	0.0111637	0.683908	0.165002
gpeakneg2680	-0.0223385	0.305793	0.021813	-0.0650912	0.0204143	0.708574	0.149615
gpeakneg2698	-0.0273335	0.23638	0.0230841	-0.0725775	0.0179105	0.684737	0.164476
gpeakneg2744	-0.0153186	0.173866	0.0112646	-0.0373969	0.00675967	0.6749	0.170761
gpeakneg2747	0.0313877	0.144499	0.0215096	-0.0107704	0.0735458	0.674355	0.171112
gpeakneg2762	-0.0103283	0.473098	0.0143959	-0.0385437	0.0178871	0.756891	0.120967
gpeakneg2765	0.0534059	0.00505631	0.0190502	0.0160681	0.0907437	0.202814	0.692902
gpeakneg2787	-0.0137948	0.256594	0.0121596	-0.0376271	0.0100375	0.684737	0.164476
gpeakneg2795	-0.0321022	0.0873657	0.0187791	-0.0689087	0.00470425	0.671043	0.17325
gpeakneg2811	-0.0207099	0.229874	0.0172484	-0.0545161	0.0130964	0.684737	0.164476
gpeakneg2822	-0.00965169	0.562472	0.0166646	-0.0423137	0.0230103	0.793174	0.100631
gpeakneg2832	-0.0147261	0.357529	0.0160051	-0.0460956	0.0166434	0.752072	0.123741
gpeakneg2886	0.0280726	0.0630612	0.0151028	-0.00152847	0.0576736	0.639158	0.194392
gpeakneg2895	0.0240945	0.0872958	0.0140917	-0.00352469	0.0517136	0.671043	0.17325
gpeakneg2900	-0.0228113	0.13885	0.0154121	-0.0530185	0.00739589	0.674355	0.171112
gpeakneg2914	-0.00806979	0.59098	0.0150159	-0.0375004	0.0213608	0.801083	0.0963225
gpeakneg2927	-0.00280044	0.824762	0.0126474	-0.0275888	0.0219879	0.927776	0.0325569
gpeakneg3029	0.00415314	0.631738	0.00866532	-0.0128306	0.0211369	0.826295	0.0828651
gpeakneg3053	0.0316898	0.00383764	0.0109608	0.0102071	0.0531725	0.173174	0.761518
gpeakneg3071	0.00947724	0.291396	0.00898262	-0.00812836	0.0270828	0.696648	0.156987
gpeakneg3239	-0.00544288	0.420736	0.00676012	-0.0186925	0.00780672	0.752072	0.123741
gpeakneg3247	0.0079533	0.466659	0.010926	-0.0134612	0.0293678	0.75246	0.123517
gpeakneg3252	0.0144772	0.206498	0.0114603	-0.0079845	0.0369389	0.683908	0.165002
gpeakneg3257	0.0183055	0.14536	0.0125715	-0.0063341	0.0429451	0.674355	0.171112
gpeakneg3264	0.024646	0.161326	0.0175964	-0.00984236	0.0591343	0.674355	0.171112
gpeakneg3268	0.018219	0.162518	0.0130447	-0.00734823	0.0437862	0.674355	0.171112
gpeakneg3276	0.0172069	0.0901087	0.0101526	-0.00269186	0.0371056	0.672632	0.172222
gpeakneg3285	-0.00175967	0.831861	0.00828801	-0.0180039	0.0144845	0.927776	0.0325569
gpeakneg3402	0.0104298	0.306853	0.0102068	-0.00957519	0.0304348	0.708574	0.149615
gpeakneg3463	0.00254069	0.848671	0.013315	-0.0235563	0.0286376	0.927776	0.0325569
gpeakneg3495	0.0217854	0.161366	0.0155556	-0.00870293	0.0522738	0.674355	0.171112
gpeakneg3514	0.00385526	0.757703	0.0124969	-0.0206381	0.0283486	0.888087	0.0515443
gpeakneg3531	0.0192042	0.284925	0.0179592	-0.0159952	0.0544035	0.696648	0.156987
gpeakneg3534	0.00169833	0.909783	0.014988	-0.0276777	0.0310743	0.951976	0.0213741
gpeakneg3543	0.0250987	0.0675107	0.0137282	-0.00180807	0.0520054	0.639158	0.194392
gpeakneg3566	0.00688417	0.508683	0.0104165	-0.0135319	0.0273002	0.766669	0.115392
gpeakneg3609	-0.0132552	0.265886	0.0119139	-0.036606	0.0100955	0.690538	0.160813
gpeakneg3625	0.0136544	0.252114	0.0119229	-0.00971398	0.0370228	0.684737	0.164476
gpeakneg3647	0.0229135	0.0307235	0.010605	0.00212812	0.0436988	0.470624	0.327326
gpeakneg3666	0.00447146	0.655655	0.0100275	-0.0151821	0.024125	0.833421	0.0791355
gpeakneg3680	-0.0021508	0.834249	0.0102783	-0.022296	0.0179944	0.927776	0.0325569
gpeakneg3685	0.0140552	0.209415	0.0111978	-0.00789208	0.0360025	0.684737	0.164476
gpeakneg3687	0.0141946	0.204432	0.0111854	-0.00772846	0.0361176	0.683908	0.165002
gpeakneg3706	0.0327486	0.0132249	0.0132176	0.00684261	0.0586545	0.360525	0.443064
gpeakneg3714	0.00746005	0.477918	0.0105122	-0.0131435	0.0280636	0.756891	0.120967
gpeakneg3735	-0.00977975	0.412444	0.0119323	-0.0331667	0.0136072	0.752072	0.123741
gpeakneg3762	0.00710539	0.639272	0.0151592	-0.0226062	0.0368169	0.827817	0.0820654
gpeakneg3786	0.0148973	0.0840399	0.00862255	-0.00200261	0.0317972	0.671043	0.17325
gpeakneg3819	0.00722781	0.716145	0.0198776	-0.0317316	0.0461872	0.864643	0.0631631
gpeakneg3824	-0.0106415	0.243189	0.00911828	-0.028513	0.00722998	0.684737	0.164476
gpeakneg3836	-0.00917638	0.272274	0.00835857	-0.0255589	0.00720611	0.692189	0.159775
gpeakneg3839	0.0143014	0.205432	0.0112945	-0.00783544	0.0364383	0.683908	0.165002
gpeakneg3840	0.0105039	0.124108	0.00683068	-0.00288396	0.0238918	0.674355	0.171112
gpeakneg3846	0.0140831	0.460227	0.0190706	-0.0232946	0.0514608	0.752072	0.123741
gpeakneg3852	0.00120255	0.886909	0.00845581	-0.0153705	0.0177756	0.942073	0.0259156
gpeakneg3855	0.00691467	0.623775	0.014097	-0.0207149	0.0345443	0.824846	0.0836272
gpeakneg3872	0.0206127	0.125205	0.0134435	-0.00573599	0.0469614	0.674355	0.171112
gpeakneg3892	0.0152216	0.121291	0.00982432	-0.00403374	0.0344769	0.674355	0.171112
gpeakneg3913	0.018292	0.153834	0.0128265	-0.00684736	0.0434314	0.674355	0.171112
gpeakneg3935	0.0236408	0.0198917	0.0101533	0.00374068	0.0435409	0.39894	0.399093
gpeakneg3944	0.0014333	0.933839	0.0172653	-0.032406	0.0352726	0.974323	0.0112971
gpeakneg3952	-0.00930613	0.558276	0.0158969	-0.0404635	0.0218513	0.793174	0.100631
gpeakneg3953	-0.0153009	0.232103	0.0128046	-0.0403974	0.00979555	0.684737	0.164476
gpeakneg3966	0.0154554	0.485199	0.0221435	-0.027945	0.0588558	0.758281	0.12017
gpeakneg3974	0.0240362	0.0987414	0.0145587	-0.00449831	0.0525707	0.672632	0.172222
gpeakneg3993	0.0287374	0.0361285	0.013714	0.00185845	0.0556164	0.488912	0.31077
gpeakneg3994	0.0343578	0.0281431	0.0156507	0.00368296	0.0650327	0.461802	0.335544
gpeakneg4012	0.0318339	0.00379819	0.0109982	0.0102777	0.05339	0.173174	0.761518
gpeakneg4014	0.0189632	0.15951	0.0134804	-0.00745796	0.0453844	0.674355	0.171112
gpeakneg4047	-0.000168802	0.992042	0.0169247	-0.0333406	0.033003	0.995531	0.00194536
gpeakneg4062	0.0556538	0.12225	0.0360126	-0.0149295	0.126237	0.674355	0.171112
gpeakneg4069	-0.0102324	0.456147	0.013731	-0.0371447	0.0166799	0.752072	0.123741
gpeakneg4077	0.0810619	0.0659149	0.0440793	-0.00533191	0.167456	0.639158	0.194392
gpeakneg4079	0.00913157	0.462493	0.0124282	-0.0152272	0.0334903	0.752072	0.123741
gpeakneg4081	-0.00825664	0.4669	0.0113488	-0.0305	0.0139867	0.75246	0.123517
gpeakneg4101	0.0289106	0.023987	0.0128074	0.00380858	0.0540126	0.432965	0.363548
gpeakneg4106	-0.0063008	0.688633	0.0157241	-0.0371194	0.0245178	0.858694	0.0661613
gpeakneg4124	0.046162	0.00207029	0.0149879	0.0167863	0.0755376	0.124562	0.904613
gpeakneg4141	0.0221455	0.0578993	0.0116773	-0.00074156	0.0450326	0.639158	0.194392
gpeakneg4151	-0.0229696	0.0325917	0.0107481	-0.0440356	-0.00190364	0.470624	0.327326
gpeakneg4172	-0.0114197	0.399873	0.0135651	-0.0380068	0.0151673	0.752072	0.123741
gpeakneg4181	0.0299188	0.170239	0.0218157	-0.0128392	0.0726768	0.6749	0.170761
gpeakneg4187	-0.0123351	0.395057	0.0145036	-0.0407617	0.0160915	0.752072	0.123741
gpeakneg4189	-0.0144634	0.445278	0.0189482	-0.0516012	0.0226744	0.752072	0.123741
gpeakneg4200	0.0372028	0.0656653	0.0202112	-0.00241043	0.0768161	0.639158	0.194392
gpeakneg4210	0.0395133	0.000432029	0.0112263	0.0175101	0.0615165	0.0389907	1.40904
gpeakneg4215	-0.0192171	0.550972	0.0322271	-0.0823811	0.0439468	0.793174	0.100631
gpeakneg4239	0.0338335	3.10595e-05	0.0081222	0.0179143	0.0497527	0.00560625	2.25133
gpeakneg4244	0.0232619	0.451451	0.0308923	-0.0372859	0.0838097	0.752072	0.123741
gpeakneg4292	0.00538438	0.696002	0.0137805	-0.021625	0.0323937	0.858694	0.0661613
gpeakneg4304	0.0272007	0.230304	0.0226753	-0.0172421	0.0716435	0.684737	0.164476
gpeakneg4319	0.0546915	0.0725913	0.0304621	-0.00501323	0.114396	0.639158	0.194392
gpeakneg4321	0.0100178	0.424067	0.0125319	-0.0145443	0.0345799	0.752072	0.123741
gpeakneg4323	-0.0184588	0.298722	0.0177629	-0.0532734	0.0163558	0.704827	0.151918
gpeakneg4333	0.0309231	0.265545	0.0277741	-0.0235131	0.0853594	0.690538	0.160813
gpeakneg4339	0.0131982	0.286259	0.0123768	-0.0110599	0.0374564	0.696648	0.156987
gpeakneg4342	-0.00474865	0.77057	0.0162832	-0.0366631	0.0271658	0.900061	0.0457281
gpeakneg4359	0.0409632	0.000346691	0.0114497	0.0185221	0.0634043	0.0389907	1.40904
gpeakneg4360	0.0154105	0.139791	0.0104367	-0.00504503	0.0358661	0.674355	0.171112
gpeakneg4363	0.0589037	0.110381	0.0368959	-0.013411	0.131218	0.674355	0.171112
gpeakneg4380	0.0325466	0.00116151	0.01002	0.0129078	0.0521854	0.0838608	1.07644
gpeakneg4417	-0.00776516	0.420049	0.00963017	-0.0266399	0.0111096	0.752072	0.123741
gpeakneg4438	0.0140946	0.218208	0.0114469	-0.00834084	0.0365301	0.684737	0.164476
gpeakneg4439	-0.0799788	0.00835729	0.0303262	-0.139417	-0.0205405	0.274271	0.56182
gpeakneg4448	0.0233018	0.103376	0.014307	-0.00473932	0.051343	0.674355	0.171112
gpeakneg4454	-0.0040383	0.856425	0.0223201	-0.0477849	0.0397083	0.927776	0.0325569
gpeakneg4456	-0.0270175	0.216334	0.0218529	-0.0698485	0.0158134	0.684737	0.164476
gpeakneg4457	-0.0373685	0.154263	0.0262302	-0.0887788	0.0140419	0.674355	0.171112
gpeakneg4472	0.0143797	0.54546	0.0237848	-0.0322376	0.0609971	0.793174	0.100631
gpeakneg4474	0.05031	2.50017e-06	0.0106858	0.0293662	0.0712538	0.000902563	3.04452
gpeakneg4476	0.0102819	0.693964	0.0261306	-0.0409331	0.0614969	0.858694	0.0661613
gpeakneg4477	-0.017442	0.365668	0.0192811	-0.0552322	0.0203482	0.752072	0.123741
gpeakneg4494	-0.00630516	0.707877	0.0168268	-0.0392851	0.0266748	0.862286	0.0643489
gpeakneg4501	0.0492054	0.015979	0.0204223	0.00917842	0.0892323	0.360525	0.443064
gpeakneg4563	-0.0163698	0.289768	0.0154631	-0.046677	0.0139375	0.696648	0.156987
gpeakneg4574	0.0094396	0.59471	0.0177428	-0.0253357	0.0442149	0.801083	0.0963225
gpeakneg4579	0.00114972	0.959363	0.0225645	-0.0430758	0.0453753	0.989637	0.00452428
gpeakneg4580	-0.0180111	0.23184	0.0150641	-0.0475362	0.011514	0.684737	0.164476
gpeakneg4581	-0.0308063	0.015366	0.0127108	-0.0557191	-0.00589364	0.360525	0.443064
gpeakneg4588	0.0436914	0.113428	0.0276009	-0.0104053	0.0977882	0.674355	0.171112
gpeakneg4593	-0.00100077	0.980433	0.0408047	-0.0809766	0.0789751	0.994203	0.00252484
gpeakneg4606	0.0234752	0.594328	0.0440787	-0.0629175	0.109868	0.801083	0.0963225
gpeakneg4623	0.0746775	0.0145984	0.0305781	0.0147456	0.134609	0.360525	0.443064
gpeakneg4632	-0.0265153	0.06565	0.0144042	-0.0547471	0.00171638	0.639158	0.194392
gpeakneg4667	0.0141863	0.462299	0.0192994	-0.0236398	0.0520124	0.752072	0.123741
gpeakneg4669	0.00924844	0.0856128	0.0053801	-0.00129636	0.0197932	0.671043	0.17325
gpeakneg4671	-0.02947	0.313356	0.0292301	-0.08676	0.0278201	0.708574	0.149615
gpeakneg4684	-0.000790871	0.972248	0.0227333	-0.0453473	0.0437655	0.994203	0.00252484
gpeakneg4685	0.0203169	0.0217829	0.00885604	0.00295942	0.0376745	0.413874	0.383132
gpeakneg4687	-0.0462692	0.0987521	0.0280261	-0.101199	0.00866091	0.672632	0.172222
gpeakneg4698	0.000695301	0.967936	0.0172973	-0.0332068	0.0345974	0.992684	0.00318881
gpeakneg4702	-0.000618817	0.977397	0.0218414	-0.0434271	0.0421895	0.994203	0.00252484
gpeakneg4706	-0.00313192	0.907526	0.0269623	-0.0559771	0.0497132	0.951976	0.0213741
gpeakneg4707	-0.00283965	0.89249	0.0210105	-0.0440194	0.0383401	0.942073	0.0259156
gpeakneg4715	-0.00367494	0.834125	0.0175486	-0.0380697	0.0307198	0.927776	0.0325569
gpeakneg4721	0.00531224	0.829029	0.0245997	-0.0429022	0.0535267	0.927776	0.0325569
gpeakneg4724	0.0174632	0.382246	0.0199861	-0.0217089	0.0566353	0.752072	0.123741
gpeakneg4781	-0.00644379	0.730273	0.0186905	-0.0430766	0.030189	0.870062	0.06045
gpeakneg4782	-0.00559941	0.711804	0.0151567	-0.035306	0.0241071	0.862286	0.0643489
gpeakneg4783	-0.0297468	0.067339	0.0162604	-0.0616166	0.00212294	0.639158	0.194392
gpeakneg4797	-0.0262929	0.316012	0.0262225	-0.077688	0.0251022	0.708574	0.149615
gpeakneg4798	-0.0186978	0.258034	0.0165313	-0.0510986	0.0137031	0.684737	0.164476
gpeakneg4805	0.0164843	0.417895	0.020349	-0.023399	0.0563676	0.752072	0.123741
gpeakneg4811	0.00924199	0.819401	0.040479	-0.0700953	0.0885793	0.927776	0.0325569
gpeakneg4821	0.0426065	0.257663	0.0376406	-0.0311676	0.116381	0.684737	0.164476
gpeakneg4831	0.0123751	0.799608	0.0487487	-0.0831706	0.107921	0.919294	0.0365454
gpeakneg4835	0.0115557	0.455975	0.0155008	-0.0188253	0.0419367	0.752072	0.123741
gpeakneg4849	0.0274266	0.398511	0.0324851	-0.0362431	0.0910963	0.752072	0.123741
gpeakneg4867	-0.0359146	0.0710814	0.0198977	-0.0749134	0.00308429	0.639158	0.194392
gpeakneg4872	0.033909	0.138668	0.0228996	-0.0109733	0.0787913	0.674355	0.171112
gpeakneg4889	-0.00383499	0.821695	0.0170168	-0.0371872	0.0295173	0.927776	0.0325569
gpeakneg4888	-0.0493375	0.0948051	0.0295332	-0.107221	0.00854649	0.672632	0.172222
gpeakneg4904	-0.00854986	0.629146	0.0177042	-0.0432494	0.0261496	0.826295	0.0828651
gpeakneg4906	-0.0189521	0.550003	0.0317054	-0.0810935	0.0431894	0.793174	0.100631
gpeakneg4907	-0.0428199	0.0783973	0.0243286	-0.0905031	0.00486333	0.671043	0.17325
gpeakneg4920	-0.0145496	0.67459	0.0346537	-0.0824696	0.0533704	0.851493	0.0698191
gpeakneg4929	0.0112074	0.520882	0.0174574	-0.0230084	0.0454232	0.771488	0.112671
gpeakneg4939	0.00377234	0.862462	0.0217751	-0.038906	0.0464507	0.929399	0.0317978
gpeakneg4953	-0.0114825	0.553725	0.01939	-0.0494863	0.0265212	0.793174	0.100631
gpeakneg4958	-0.0056271	0.804257	0.0227044	-0.0501269	0.0388727	0.921704	0.0354086
gpeakneg4960	0.0119844	0.422562	0.0149434	-0.0173041	0.0412729	0.752072	0.123741
gpeakneg5034	0.0217635	0.061113	0.0116216	-0.00101441	0.0445415	0.639158	0.194392
gpeakneg5040	0.0586292	0.111915	0.036882	-0.0136582	0.130917	0.674355	0.171112
gpeakneg5049	0.0165384	0.45616	0.0221936	-0.0269604	0.0600371	0.752072	0.123741
gpeakneg5055	-0.000371406	0.990155	0.0301006	-0.0593675	0.0586247	0.995531	0.00194536
gpeakneg5056	0.033773	0.217037	0.0273588	-0.0198493	0.0873952	0.684737	0.164476
gpeakneg5070	0.0252681	0.40735	0.0304961	-0.0345033	0.0850394	0.752072	0.123741
gpeakneg5079	0.00251683	0.940571	0.0337595	-0.0636505	0.0686842	0.978519	0.00943053
gpeakneg5093	0.0380412	0.069495	0.0209572	-0.0030341	0.0791166	0.639158	0.194392
gpeakneg5106	0.0176483	0.491517	0.0256554	-0.0326353	0.0679319	0.758281	0.12017
gpeakneg5107	-0.000389581	0.985962	0.0221417	-0.0437865	0.0430074	0.995531	0.00194536
gpeakneg5123	-0.0185745	0.0934711	0.0110736	-0.0402784	0.0031294	0.672632	0.172222
gpeakneg5127	0.0220109	0.315467	0.0219272	-0.0209656	0.0649874	0.708574	0.149615
gpeakneg5145	-0.00684551	0.710456	0.0184394	-0.0429861	0.0292951	0.862286	0.0643489
gpeakneg5161	-0.0112566	0.639781	0.0240524	-0.0583984	0.0358852	0.827817	0.0820654
gpeakneg5173	0.0336885	0.20037	0.0263089	-0.017876	0.0852531	0.683908	0.165002
gpeakneg5174	-0.00489113	0.843017	0.0246982	-0.0532988	0.0435165	0.927776	0.0325569
gpeakneg5187	0.0010228	0.945413	0.0149384	-0.028256	0.0303016	0.98073	0.00845038
gpeakneg5189	0.0081666	0.75201	0.0258445	-0.0424877	0.0588209	0.884286	0.0534074
gpeakneg5190	0.0106384	0.613577	0.0210673	-0.0306527	0.0519296	0.820376	0.0859872
gpeakneg5191	0.0328886	0.106708	0.0203876	-0.00707032	0.0728475	0.674355	0.171112
gpeakneg5207	-0.00177467	0.87576	0.0113508	-0.0240219	0.0204726	0.938128	0.0277377
gpeakneg5209	0.0251924	0.183449	0.0189387	-0.0119267	0.0623116	0.682734	0.165748
gpeakneg5218	0.0117181	0.499883	0.0173685	-0.0223236	0.0457597	0.763144	0.117393
gpeakneg5285	0.0145959	0.179785	0.010881	-0.00673041	0.0359223	0.682734	0.165748
gpeakneg5292	0.0495739	0.0317316	0.0230815	0.00433496	0.0948129	0.470624	0.327326
gpeakneg5302	0.0197193	0.222658	0.0161701	-0.0119735	0.0514122	0.684737	0.164476
gpeakneg5307	0.00360816	0.874351	0.022817	-0.0411124	0.0483287	0.938128	0.0277377
gpeakneg5316	0.0226038	0.255882	0.0198945	-0.0163888	0.0615963	0.684737	0.164476
gpeakneg5322	0.0173923	0.392069	0.0203212	-0.0224364	0.057221	0.752072	0.123741
gpeakneg5323	0.0171643	0.290572	0.0162407	-0.014667	0.0489956	0.696648	0.156987
gpeakneg5331	0.0105912	0.452585	0.0141007	-0.0170457	0.0382281	0.752072	0.123741
gpeakneg5336	-0.00570176	0.648292	0.0125001	-0.0302015	0.018798	0.829905	0.0809715
gpeakneg5361	-0.00284467	0.850106	0.0150525	-0.032347	0.0266576	0.927776	0.0325569
gpeakneg5363	0.00784947	0.616914	0.0156918	-0.0229058	0.0386048	0.821794	0.0852373
gpeakneg5373	0.0272765	0.255466	0.0239863	-0.0197357	0.0742888	0.684737	0.164476
gpeakneg5385	0.0283825	0.235537	0.0239269	-0.0185134	0.0752784	0.684737	0.164476
gpeakneg5386	0.0166224	0.306379	0.0162511	-0.0152291	0.0484739	0.708574	0.149615
gpeakneg5400	0.0171294	0.325473	0.0174208	-0.0170147	0.0512735	0.716438	0.144821
gpeakneg5410	0.0370273	0.0148899	0.015206	0.00722408	0.0668305	0.360525	0.443064
gpeakneg5416	0.00876321	0.560875	0.0150689	-0.0207713	0.0382977	0.793174	0.100631
gpeakneg5450	-0.0186329	0.246537	0.0160795	-0.0501481	0.0128823	0.684737	0.164476
gpeakneg5459	0.0317016	0.0190957	0.0135265	0.00519006	0.0582131	0.39894	0.399093
gpeakneg5470	-0.00468487	0.795277	0.018056	-0.0400739	0.0307042	0.917237	0.0375185
gpeakneg5502	0.00738503	0.412474	0.00901112	-0.0102764	0.0250465	0.752072	0.123741
gpeakneg5503	0.00252155	0.72053	0.00704835	-0.011293	0.0163361	0.865903	0.0625308
gpeakneg5513	-0.00238479	0.846618	0.0123286	-0.0265485	0.0217789	0.927776	0.0325569
gpeakneg5512	0.0199799	0.11931	0.0128267	-0.00516004	0.0451198	0.674355	0.171112
gpeakneg5524	0.00918628	0.58329	0.0167454	-0.0236341	0.0420066	0.794595	0.0998543
gpeakneg5547	0.0208179	0.251409	0.0181509	-0.0147572	0.0563929	0.684737	0.164476
gpeakneg5546	0.0102494	0.5107	0.0155825	-0.0202918	0.0407905	0.766669	0.115392
gpeakneg5647	-0.00810401	0.684072	0.0199158	-0.0471383	0.0309303	0.858694	0.0661613
gpeakneg5660	0.0082468	0.489913	0.0119441	-0.0151633	0.0316569	0.758281	0.12017
gpeakneg5675	0.00701954	0.489277	0.0101518	-0.0128776	0.0269167	0.758281	0.12017
gpeakneg5691	0.000119591	0.992793	0.0132388	-0.0258279	0.0260671	0.995531	0.00194536
gpeakneg5701	0.0159196	0.246749	0.0137442	-0.0110185	0.0428577	0.684737	0.164476

## Sheet: 07_lip_cov_diag
lipid	coef	pval	se	ci_low	ci_high	FDR	log10_FDR
gpeakpos1999	-0.00105969	0.898795	0.00833195	-0.01739	0.0152706	0.992248	0.0033798
gpeakpos2041	-0.00599423	0.399443	0.00711384	-0.0199371	0.00794864	0.992081	0.0034527
gpeakpos2069	-0.0042962	0.703871	0.0113028	-0.0264493	0.0178569	0.992081	0.0034527
gpeakpos2099	-0.00457118	0.635552	0.00964532	-0.0234757	0.0143333	0.992081	0.0034527
gpeakpos2229	0.00229366	0.84227	0.0115264	-0.0202977	0.0248851	0.992081	0.0034527
gpeakpos2348	-0.00121677	0.873435	0.00763842	-0.0161878	0.0137543	0.992081	0.0034527
gpeakpos2417	0.000238017	0.9813	0.0101545	-0.0196644	0.0201404	0.996768	0.00140605
gpeakpos2561	-0.00164048	0.87513	0.0104392	-0.022101	0.01882	0.992081	0.0034527
gpeakpos2582	-0.00930105	0.26294	0.00830845	-0.0255853	0.00698321	0.992081	0.0034527
gpeakpos2688	0.00237703	0.753154	0.00755851	-0.0124374	0.0171914	0.992081	0.0034527
gpeakpos2726	-0.00319007	0.735426	0.0094404	-0.0216929	0.0153128	0.992081	0.0034527
gpeakpos2767	0.00220144	0.879677	0.0145426	-0.0263016	0.0307045	0.992081	0.0034527
gpeakpos3064	-0.00272502	0.650029	0.00600593	-0.0144964	0.00904638	0.992081	0.0034527
gpeakpos3098	-0.00368881	0.845559	0.0189376	-0.0408058	0.0334282	0.992081	0.0034527
gpeakpos3375	-0.00285886	0.78826	0.0106447	-0.0237221	0.0180044	0.992081	0.0034527
gpeakpos3419	-0.00310119	0.842271	0.0155848	-0.0336468	0.0274444	0.992081	0.0034527
gpeakpos3441	-0.0234782	0.179949	0.0175091	-0.0577955	0.0108391	0.992081	0.0034527
gpeakpos4188	-0.0201745	0.534968	0.0325164	-0.0839055	0.0435565	0.992081	0.0034527
gpeakpos4442	-0.0439937	0.019714	0.0188673	-0.0809728	-0.00701453	0.992081	0.0034527
gpeakpos4465	-0.0417102	0.075033	0.0234292	-0.0876306	0.00421026	0.992081	0.0034527
gpeakpos4494	-0.0156357	0.415677	0.0192098	-0.0532861	0.0220148	0.992081	0.0034527
gpeakpos5151	-0.0250445	0.0600882	0.0133205	-0.0511521	0.00106321	0.992081	0.0034527
gpeakpos5531	-0.023598	0.210116	0.0188295	-0.0605031	0.0133072	0.992081	0.0034527
gpeakpos5562	-0.00725503	0.679037	0.0175337	-0.0416204	0.0271103	0.992081	0.0034527
gpeakpos5917	-0.0156748	0.266208	0.0140981	-0.0433066	0.011957	0.992081	0.0034527
gpeakpos6622	-0.00324374	0.783742	0.0118192	-0.026409	0.0199215	0.992081	0.0034527
gpeakpos7122	0.00870082	0.654697	0.0194542	-0.0294286	0.0468303	0.992081	0.0034527
gpeakpos7158	0.0206406	0.211393	0.0165158	-0.0117298	0.053011	0.992081	0.0034527
gpeakpos7470	-0.00169301	0.675233	0.00404081	-0.00961284	0.00622683	0.992081	0.0034527
gpeakpos7514	-0.00212883	0.564112	0.00369112	-0.00936329	0.00510563	0.992081	0.0034527
gpeakpos7549	-0.00189201	0.864026	0.0110481	-0.0235459	0.0197618	0.992081	0.0034527
gpeakpos7586	0.0233334	0.184722	0.0175921	-0.0111465	0.0578133	0.992081	0.0034527
gpeakpos7730	-0.000950113	0.83632	0.00459874	-0.00996348	0.00806325	0.992081	0.0034527
gpeakpos7769	-0.000194125	0.963024	0.00418737	-0.00840121	0.00801296	0.996768	0.00140605
gpeakpos7961	-0.00210124	0.628759	0.00434612	-0.0106195	0.006417	0.992081	0.0034527
gpeakpos7997	-0.00195012	0.643925	0.00421906	-0.0102193	0.00631908	0.992081	0.0034527
gpeakpos8043	-0.00176606	0.659784	0.00401184	-0.00962912	0.00609701	0.992081	0.0034527
gpeakpos8324	-0.00245766	0.628938	0.00508599	-0.012426	0.0075107	0.992081	0.0034527
gpeakpos8631	-0.00338815	0.512828	0.00517717	-0.0135352	0.00675892	0.992081	0.0034527
gpeakpos8679	-0.003354	0.494634	0.004911	-0.0129794	0.00627139	0.992081	0.0034527
gpeakpos8733	-0.00159566	0.753734	0.00508626	-0.0115645	0.00837322	0.992081	0.0034527
gpeakpos9000	-0.00476516	0.4788	0.00672823	-0.0179522	0.00842192	0.992081	0.0034527
gpeakpos9264	-0.00635306	0.303581	0.0061753	-0.0184564	0.00575031	0.992081	0.0034527
gpeakpos9328	-0.00514542	0.39706	0.00607571	-0.0170536	0.00676275	0.992081	0.0034527
gpeakpos9390	-0.0047741	0.46256	0.00649859	-0.0175111	0.00796289	0.992081	0.0034527
gpeakpos9446	-0.0040071	0.545484	0.00662833	-0.0169984	0.0089842	0.992081	0.0034527
gpeakpos9505	-0.00172649	0.823951	0.00776066	-0.0169371	0.0134841	0.992081	0.0034527
gpeakpos9794	-0.00692525	0.345773	0.00734526	-0.0213217	0.00747119	0.992081	0.0034527
gpeakpos9863	-0.00397911	0.588418	0.00735333	-0.0183914	0.0104331	0.992081	0.0034527
gpeakpos9918	-0.00192986	0.778998	0.00687699	-0.0154085	0.0115488	0.992081	0.0034527
gpeakpos10107	-0.00932571	0.176157	0.00689424	-0.0228382	0.00418675	0.992081	0.0034527
gpeakpos10171	-0.00841241	0.232292	0.00704277	-0.022216	0.00539116	0.992081	0.0034527
gpeakpos10236	-0.0084356	0.32924	0.00864616	-0.0253818	0.00851057	0.992081	0.0034527
gpeakpos10371	-0.00621312	0.502127	0.00925747	-0.0243574	0.0119312	0.992081	0.0034527
gpeakpos10445	0.00461037	0.741404	0.0139711	-0.0227724	0.0319931	0.992081	0.0034527
gpeakpos10660	-0.00885783	0.303634	0.00861095	-0.025735	0.00801932	0.992081	0.0034527
gpeakpos10723	-0.00642456	0.519157	0.00996604	-0.0259576	0.0131085	0.992081	0.0034527
gpeakpos10860	-0.00413888	0.651318	0.00915817	-0.0220886	0.0138108	0.992081	0.0034527
gpeakpos10926	0.00513101	0.586535	0.00943436	-0.01336	0.023622	0.992081	0.0034527
gpeakpos11003	-0.0107434	0.145103	0.00737337	-0.0251949	0.00370817	0.992081	0.0034527
gpeakpos11076	-0.0124363	0.13505	0.00832149	-0.0287461	0.00387351	0.992081	0.0034527
gpeakpos11134	-0.0103936	0.346693	0.011045	-0.0320414	0.0112542	0.992081	0.0034527
gpeakpos11200	-0.00892979	0.58012	0.0161418	-0.0405671	0.0227075	0.992081	0.0034527
gpeakpos11253	-0.0124666	0.467965	0.0171766	-0.0461321	0.0211988	0.992081	0.0034527
gpeakpos11314	-0.00754515	0.580647	0.0136579	-0.0343141	0.0192238	0.992081	0.0034527
gpeakpos11389	0.00693764	0.564399	0.0120378	-0.0166561	0.0305314	0.992081	0.0034527
gpeakpos11522	-0.0121099	0.250286	0.0105335	-0.0327552	0.00853541	0.992081	0.0034527
gpeakpos11585	-0.0094075	0.47203	0.0130809	-0.0350455	0.0162305	0.992081	0.0034527
gpeakpos11639	-0.00402816	0.784474	0.0147285	-0.0328955	0.0248392	0.992081	0.0034527
gpeakpos11690	-0.00567586	0.679741	0.0137491	-0.0326236	0.0212719	0.992081	0.0034527
gpeakpos11823	-0.014097	0.0924493	0.00837801	-0.0305176	0.00232362	0.992081	0.0034527
gpeakpos11828	0.00134333	0.894133	0.0100944	-0.0184414	0.0211281	0.992081	0.0034527
gpeakpos11905	-0.0153513	0.100884	0.00935718	-0.033691	0.00298849	0.992081	0.0034527
gpeakpos11964	-0.0147176	0.227928	0.0122066	-0.038642	0.00920681	0.992081	0.0034527
gpeakpos12022	-0.00961309	0.593717	0.0180203	-0.0449323	0.0257061	0.992081	0.0034527
gpeakpos12080	-0.0025764	0.925662	0.0276129	-0.0566966	0.0515438	0.996768	0.00140605
gpeakpos12125	-0.0115652	0.657731	0.0261037	-0.0627274	0.039597	0.992081	0.0034527
gpeakpos12192	-0.00908796	0.340489	0.00953416	-0.0277746	0.00959865	0.992081	0.0034527
gpeakpos12323	-0.00696199	0.444744	0.00911008	-0.0248174	0.0108934	0.992081	0.0034527
gpeakpos12430	-0.00767144	0.630416	0.0159442	-0.0389216	0.0235787	0.992081	0.0034527
gpeakpos12484	-0.00366504	0.818756	0.0159944	-0.0350135	0.0276834	0.992081	0.0034527
gpeakpos12743	-0.00818026	0.51274	0.012497	-0.0326739	0.0163134	0.992081	0.0034527
gpeakpos12792	-0.00733758	0.64364	0.0158611	-0.0384247	0.0237496	0.992081	0.0034527
gpeakpos12841	-0.00189791	0.923979	0.0198894	-0.0408803	0.0370845	0.996768	0.00140605
gpeakpos12892	-0.00345173	0.878979	0.0226694	-0.047883	0.0409795	0.992081	0.0034527
gpeakpos12955	-0.00110614	0.914895	0.0103507	-0.0213931	0.0191808	0.996768	0.00140605
gpeakpos13012	-0.00714173	0.452084	0.00949766	-0.0257568	0.0114733	0.992081	0.0034527
gpeakpos13066	-0.00662597	0.573069	0.0117578	-0.0296709	0.0164189	0.992081	0.0034527
gpeakpos13118	-0.00632979	0.68577	0.0156445	-0.0369924	0.0243328	0.992081	0.0034527
gpeakpos13174	-0.00467346	0.771848	0.0161177	-0.0362636	0.0269166	0.992081	0.0034527
gpeakpos13342	-0.00778337	0.417878	0.00960781	-0.0266143	0.0110476	0.992081	0.0034527
gpeakpos13459	-0.000285604	0.985305	0.0155062	-0.0306771	0.0301059	0.996768	0.00140605
gpeakpos13500	0.00122127	0.948823	0.0190275	-0.0360719	0.0385144	0.996768	0.00140605
gpeakpos13549	0.00434891	0.797519	0.0169509	-0.0288742	0.037572	0.992081	0.0034527
gpeakpos13594	0.00860589	0.639963	0.0183985	-0.0274545	0.0446663	0.992081	0.0034527
gpeakpos13728	-0.00164624	0.878834	0.0107987	-0.0228113	0.0195188	0.992081	0.0034527
gpeakpos13775	0.00081668	0.947305	0.0123568	-0.0234023	0.0250356	0.996768	0.00140605
gpeakpos13980	-0.0019909	0.838134	0.00974593	-0.0210926	0.0171108	0.992081	0.0034527
gpeakpos14026	-0.00100087	0.933842	0.0120569	-0.024632	0.0226303	0.996768	0.00140605
gpeakpos14078	0.00191628	0.895896	0.0146452	-0.0267878	0.0306203	0.992081	0.0034527
gpeakpos14294	-0.00133278	0.946419	0.0198318	-0.0402023	0.0375368	0.996768	0.00140605
gpeakneg291	0.00189064	0.839648	0.00934371	-0.0164227	0.020204	0.992081	0.0034527
gpeakneg300	-0.00905082	0.370188	0.0101	-0.0288465	0.0107448	0.992081	0.0034527
gpeakneg372	-0.000590827	0.941506	0.00805191	-0.0163723	0.0151906	0.996768	0.00140605
gpeakneg378	0.00435684	0.751308	0.0137476	-0.022588	0.0313017	0.992081	0.0034527
gpeakneg391	0.0174191	0.132189	0.0115701	-0.00525792	0.0400961	0.992081	0.0034527
gpeakneg437	-0.00199027	0.78854	0.00742067	-0.0165345	0.012554	0.992081	0.0034527
gpeakneg451	0.00432411	0.745926	0.0133453	-0.0218323	0.0304805	0.992081	0.0034527
gpeakneg731	-0.00607457	0.636285	0.0128454	-0.031251	0.0191019	0.992081	0.0034527
gpeakneg1173	-0.00816025	0.449977	0.0108018	-0.0293314	0.0130109	0.992081	0.0034527
gpeakneg1346	0.00676971	0.406069	0.00814812	-0.00920031	0.0227397	0.992081	0.0034527
gpeakneg1472	0.00578466	0.504557	0.00866827	-0.0112049	0.0227742	0.992081	0.0034527
gpeakneg1488	0.000464032	0.962593	0.00989408	-0.018928	0.0198561	0.996768	0.00140605
gpeakneg1516	0.0151365	0.192914	0.0116255	-0.00764906	0.037922	0.992081	0.0034527
gpeakneg1533	0.0122813	0.267918	0.0110855	-0.00944588	0.0340084	0.992081	0.0034527
gpeakneg1541	0.00631916	0.671787	0.0149144	-0.0229125	0.0355508	0.992081	0.0034527
gpeakneg1580	0.00143688	0.916686	0.0137357	-0.0254847	0.0283584	0.996768	0.00140605
gpeakneg1638	0.0048918	0.436987	0.00629339	-0.00744302	0.0172266	0.992081	0.0034527
gpeakneg1645	-0.00066379	0.933044	0.00790078	-0.016149	0.0148214	0.996768	0.00140605
gpeakneg1652	0.00256413	0.760231	0.00840211	-0.0139037	0.019032	0.992081	0.0034527
gpeakneg1661	0.00559869	0.532914	0.00897853	-0.0119989	0.0231963	0.992081	0.0034527
gpeakneg1677	0.00547585	0.659454	0.0124263	-0.0188792	0.0298309	0.992081	0.0034527
gpeakneg1699	0.00815426	0.578654	0.0146831	-0.020624	0.0369325	0.992081	0.0034527
gpeakneg1723	0.00582622	0.607625	0.0113468	-0.0164131	0.0280656	0.992081	0.0034527
gpeakneg1722	0.00643446	0.462174	0.00875113	-0.0107174	0.0235864	0.992081	0.0034527
gpeakneg1737	0.00484737	0.517936	0.00749751	-0.00984747	0.0195422	0.992081	0.0034527
gpeakneg1778	0.00292444	0.587306	0.00538826	-0.00763635	0.0134852	0.992081	0.0034527
gpeakneg1793	0.00126532	0.824725	0.00571325	-0.00993244	0.0124631	0.992081	0.0034527
gpeakneg1860	0.00723395	0.142761	0.00493587	-0.00244017	0.0169081	0.992081	0.0034527
gpeakneg2026	-0.00666131	0.339103	0.00696835	-0.020319	0.0069964	0.992081	0.0034527
gpeakneg2039	-0.0147424	0.281058	0.0136764	-0.0415477	0.0120628	0.992081	0.0034527
gpeakneg2174	-0.0130207	0.0880226	0.00763262	-0.0279803	0.001939	0.992081	0.0034527
gpeakneg2200	-0.00853562	0.384729	0.0098199	-0.0277823	0.010711	0.992081	0.0034527
gpeakneg2206	-0.00551221	0.578718	0.00992727	-0.0249693	0.0139449	0.992081	0.0034527
gpeakneg2319	-0.0122397	0.146692	0.00843354	-0.0287692	0.00428971	0.992081	0.0034527
gpeakneg2333	-0.00936335	0.489004	0.0135329	-0.0358874	0.0171607	0.992081	0.0034527
gpeakneg2339	-0.00723757	0.460253	0.00980127	-0.0264477	0.0119726	0.992081	0.0034527
gpeakneg2428	0.000130339	0.989184	0.00961483	-0.0187144	0.0189751	0.997473	0.00109865
gpeakneg2429	-0.0194406	0.150293	0.0135145	-0.0459287	0.00704737	0.992081	0.0034527
gpeakneg2515	-0.0134123	0.359771	0.0146454	-0.0421167	0.0152922	0.992081	0.0034527
gpeakneg2552	-0.0164643	0.261135	0.0146517	-0.0451812	0.0122525	0.992081	0.0034527
gpeakneg2559	-0.0399275	0.0825677	0.023	-0.0850067	0.00515167	0.992081	0.0034527
gpeakneg2635	-0.0201153	0.20137	0.0157439	-0.0509728	0.0107421	0.992081	0.0034527
gpeakneg2637	0.00877241	0.563315	0.0151792	-0.0209782	0.038523	0.992081	0.0034527
gpeakneg2660	-0.0226731	0.0640459	0.0122434	-0.0466698	0.00132356	0.992081	0.0034527
gpeakneg2668	-0.023263	0.142433	0.0158598	-0.0543476	0.00782164	0.992081	0.0034527
gpeakneg2680	-0.0246718	0.21659	0.0199667	-0.0638059	0.0144623	0.992081	0.0034527
gpeakneg2698	-0.0406362	0.0477131	0.0205242	-0.0808629	-0.00040948	0.992081	0.0034527
gpeakneg2744	-0.0134173	0.190741	0.0102548	-0.0335164	0.00668176	0.992081	0.0034527
gpeakneg2747	0.011539	0.556416	0.0196183	-0.0269122	0.0499902	0.992081	0.0034527
gpeakneg2762	-0.0180237	0.150078	0.0125229	-0.0425682	0.0065208	0.992081	0.0034527
gpeakneg2765	0.0189354	0.294493	0.0180627	-0.0164668	0.0543376	0.992081	0.0034527
gpeakneg2787	-0.0198742	0.0670586	0.0108526	-0.0411449	0.00139654	0.992081	0.0034527
gpeakneg2795	-0.0267707	0.130159	0.0176882	-0.061439	0.0078976	0.992081	0.0034527
gpeakneg2811	-0.0175361	0.251455	0.015291	-0.047506	0.0124338	0.992081	0.0034527
gpeakneg2822	-0.0167895	0.289048	0.015836	-0.0478275	0.0142485	0.992081	0.0034527
gpeakneg2832	-0.0188845	0.180915	0.0141146	-0.0465486	0.00877958	0.992081	0.0034527
gpeakneg2886	0.000583973	0.966338	0.0138379	-0.0265377	0.0277057	0.996768	0.00140605
gpeakneg2895	0.00233172	0.858877	0.013114	-0.0233713	0.0280348	0.992081	0.0034527
gpeakneg2900	-0.026018	0.0745483	0.0145903	-0.0546145	0.00257856	0.992081	0.0034527
gpeakneg2914	-0.0152869	0.263442	0.0136699	-0.0420795	0.0115056	0.992081	0.0034527
gpeakneg2927	-0.00359063	0.751169	0.0113234	-0.0257841	0.0186029	0.992081	0.0034527
gpeakneg3029	-0.00592064	0.469848	0.00819209	-0.0219768	0.0101356	0.992081	0.0034527
gpeakneg3053	0.0171989	0.0987765	0.0104184	-0.00322086	0.0376187	0.992081	0.0034527
gpeakneg3071	-0.00335445	0.698017	0.00864552	-0.0202994	0.0135905	0.992081	0.0034527
gpeakneg3239	-0.00939636	0.123885	0.00610681	-0.0213655	0.00257277	0.992081	0.0034527
gpeakneg3247	-0.00649528	0.538294	0.0105547	-0.027182	0.0141915	0.992081	0.0034527
gpeakneg3252	0.0123362	0.242951	0.0105651	-0.00837093	0.0330434	0.992081	0.0034527
gpeakneg3257	-0.00171617	0.889134	0.0123112	-0.0258456	0.0224132	0.992081	0.0034527
gpeakneg3264	0.00544934	0.736151	0.0161724	-0.0262479	0.0371466	0.992081	0.0034527
gpeakneg3268	-0.00425347	0.743455	0.0129964	-0.0297259	0.021219	0.992081	0.0034527
gpeakneg3276	0.00209819	0.828786	0.00970224	-0.0169178	0.0211142	0.992081	0.0034527
gpeakneg3285	-0.0138684	0.0734141	0.00774661	-0.0290514	0.00131473	0.992081	0.0034527
gpeakneg3402	-0.000562893	0.955742	0.0101427	-0.0204423	0.0193165	0.996768	0.00140605
gpeakneg3463	0.000594728	0.958775	0.0115056	-0.0219558	0.0231452	0.996768	0.00140605
gpeakneg3495	0.0054291	0.698176	0.0140003	-0.022011	0.0328692	0.992081	0.0034527
gpeakneg3514	0.00815101	0.467021	0.0112067	-0.0138137	0.0301157	0.992081	0.0034527
gpeakneg3531	0.00577931	0.732328	0.016897	-0.0273383	0.0388969	0.992081	0.0034527
gpeakneg3534	0.00292584	0.822082	0.0130114	-0.022576	0.0284277	0.992081	0.0034527
gpeakneg3543	0.00651156	0.615704	0.0129726	-0.0189142	0.0319373	0.992081	0.0034527
gpeakneg3566	-0.00406143	0.676172	0.00972349	-0.0231191	0.0149963	0.992081	0.0034527
gpeakneg3609	-0.0102182	0.325166	0.0103854	-0.0305733	0.0101369	0.992081	0.0034527
gpeakneg3625	0.00595243	0.582831	0.0108373	-0.0152883	0.0271931	0.992081	0.0034527
gpeakneg3647	0.00935679	0.339661	0.00979936	-0.00984961	0.0285632	0.992081	0.0034527
gpeakneg3666	0.0051022	0.577557	0.00916086	-0.0128528	0.0230572	0.992081	0.0034527
gpeakneg3680	-0.00961701	0.304771	0.00937096	-0.0279838	0.00874973	0.992081	0.0034527
gpeakneg3685	-0.000376333	0.970328	0.0101172	-0.0202057	0.019453	0.996768	0.00140605
gpeakneg3687	0.00720068	0.492882	0.0105007	-0.0133803	0.0277817	0.992081	0.0034527
gpeakneg3706	0.0158524	0.183594	0.0119211	-0.0075126	0.0392173	0.992081	0.0034527
gpeakneg3714	-0.00369631	0.704137	0.00973375	-0.0227741	0.0153815	0.992081	0.0034527
gpeakneg3735	-0.0101126	0.316346	0.0100924	-0.0298934	0.00966824	0.992081	0.0034527
gpeakneg3762	0.000328323	0.980221	0.0132435	-0.0256284	0.0262851	0.996768	0.00140605
gpeakneg3786	0.00462228	0.569014	0.00811633	-0.0112854	0.02053	0.992081	0.0034527
gpeakneg3819	0.000107774	0.995022	0.0172739	-0.0337484	0.033964	0.998347	0.000718319
gpeakneg3824	-0.00563195	0.494983	0.00825309	-0.0218077	0.0105438	0.992081	0.0034527
gpeakneg3836	-0.0127444	0.0916639	0.00755591	-0.0275538	0.00206487	0.992081	0.0034527
gpeakneg3839	0.0035808	0.734395	0.010554	-0.0171046	0.0242662	0.992081	0.0034527
gpeakneg3840	0.00199797	0.76957	0.00682044	-0.0113699	0.0153658	0.992081	0.0034527
gpeakneg3846	0.0129833	0.450827	0.0172184	-0.0207641	0.0467308	0.992081	0.0034527
gpeakneg3852	-0.00374667	0.626793	0.0077053	-0.0188488	0.0113554	0.992081	0.0034527
gpeakneg3855	0.000329053	0.980255	0.0132955	-0.0257296	0.0263877	0.996768	0.00140605
gpeakneg3872	0.0128137	0.312111	0.0126767	-0.0120323	0.0376597	0.992081	0.0034527
gpeakneg3892	0.00124742	0.89167	0.00915934	-0.0167046	0.0191994	0.992081	0.0034527
gpeakneg3913	0.000684526	0.955422	0.0122456	-0.0233164	0.0246855	0.996768	0.00140605
gpeakneg3935	0.00296092	0.759354	0.00966581	-0.0159837	0.0219056	0.992081	0.0034527
gpeakneg3944	-0.00222767	0.884722	0.0153647	-0.0323419	0.0278866	0.992081	0.0034527
gpeakneg3952	-0.00941762	0.506851	0.0141885	-0.0372266	0.0183914	0.992081	0.0034527
gpeakneg3953	-0.0216905	0.0525491	0.0111887	-0.04362	0.000238951	0.992081	0.0034527
gpeakneg3966	0.0119275	0.550406	0.0199739	-0.0272207	0.0510757	0.992081	0.0034527
gpeakneg3974	0.00764642	0.566297	0.0133326	-0.018485	0.0337778	0.992081	0.0034527
gpeakneg3993	0.0133345	0.291666	0.0126457	-0.0114505	0.0381196	0.992081	0.0034527
gpeakneg3994	0.0219127	0.118157	0.0140236	-0.0055731	0.0493986	0.992081	0.0034527
gpeakneg4012	0.0220611	0.0367518	0.0105631	0.00135785	0.0427644	0.992081	0.0034527
gpeakneg4014	0.0137837	0.259459	0.0122231	-0.0101732	0.0377406	0.992081	0.0034527
gpeakneg4047	-0.00673115	0.659127	0.0152592	-0.0366387	0.0231764	0.992081	0.0034527
gpeakneg4062	0.0414739	0.193219	0.0318757	-0.0210012	0.103949	0.992081	0.0034527
gpeakneg4069	-0.00650232	0.604911	0.0125685	-0.0311361	0.0181315	0.992081	0.0034527
gpeakneg4077	0.0483013	0.22005	0.0393848	-0.0288914	0.125494	0.992081	0.0034527
gpeakneg4079	0.00618297	0.594135	0.0116035	-0.0165595	0.0289255	0.992081	0.0034527
gpeakneg4081	-0.0100018	0.314072	0.0099351	-0.0294742	0.00947064	0.992081	0.0034527
gpeakneg4101	0.0156926	0.199857	0.0122411	-0.00829957	0.0396848	0.992081	0.0034527
gpeakneg4106	-0.00492519	0.720854	0.0137838	-0.0319409	0.0220905	0.992081	0.0034527
gpeakneg4124	0.0274295	0.0579109	0.0144642	-0.000919812	0.0557788	0.992081	0.0034527
gpeakneg4141	0.0111954	0.32509	0.0113768	-0.0111028	0.0334935	0.992081	0.0034527
gpeakneg4151	-0.0162409	0.0878565	0.00951532	-0.0348906	0.0024088	0.992081	0.0034527
gpeakneg4172	-0.0137509	0.255951	0.0121045	-0.0374754	0.00997355	0.992081	0.0034527
gpeakneg4181	0.0105072	0.593952	0.0197089	-0.0281216	0.049136	0.992081	0.0034527
gpeakneg4187	-0.00845928	0.531038	0.0135041	-0.0349269	0.0180083	0.992081	0.0034527
gpeakneg4189	-0.00623668	0.716058	0.0171464	-0.0398429	0.0273696	0.992081	0.0034527
gpeakneg4200	0.0257386	0.17012	0.0187624	-0.011035	0.0625123	0.992081	0.0034527
gpeakneg4210	0.0246476	0.0240517	0.0109239	0.00323717	0.0460581	0.992081	0.0034527
gpeakneg4215	0.0212473	0.510403	0.0322804	-0.0420211	0.0845157	0.992081	0.0034527
gpeakneg4239	0.0241171	0.000912541	0.00727254	0.0098632	0.038371	0.329427	0.482241
gpeakneg4244	0.0237895	0.412122	0.0290058	-0.0330607	0.0806398	0.992081	0.0034527
gpeakneg4292	-0.00431806	0.729885	0.012506	-0.0288294	0.0201933	0.992081	0.0034527
gpeakneg4304	0.00350234	0.866009	0.0207571	-0.0371809	0.0441856	0.992081	0.0034527
gpeakneg4319	0.0145502	0.582588	0.0264736	-0.0373372	0.0664375	0.992081	0.0034527
gpeakneg4321	0.0050517	0.67255	0.0119524	-0.0183746	0.028478	0.992081	0.0034527
gpeakneg4323	-0.0145995	0.338371	0.0152492	-0.0444874	0.0152885	0.992081	0.0034527
gpeakneg4333	-0.00774799	0.757967	0.0251434	-0.0570282	0.0415323	0.992081	0.0034527
gpeakneg4339	0.00430199	0.714885	0.0117765	-0.0187795	0.0273834	0.992081	0.0034527
gpeakneg4342	-0.00851168	0.550304	0.0142501	-0.0364414	0.0194181	0.992081	0.0034527
gpeakneg4359	0.0242176	0.0264772	0.010913	0.0028284	0.0456067	0.992081	0.0034527
gpeakneg4360	0.0162878	0.0942531	0.00973349	-0.00278949	0.0353651	0.992081	0.0034527
gpeakneg4363	0.047476	0.164315	0.0341381	-0.0194334	0.114385	0.992081	0.0034527
gpeakneg4380	0.0220241	0.0175408	0.00927265	0.00385008	0.0401982	0.992081	0.0034527
gpeakneg4417	-0.00752282	0.402313	0.00898251	-0.0251282	0.0100826	0.992081	0.0034527
gpeakneg4438	0.00410971	0.698569	0.0106125	-0.0166903	0.0249097	0.992081	0.0034527
gpeakneg4439	-0.039972	0.187047	0.0302964	-0.0993519	0.0194078	0.992081	0.0034527
gpeakneg4448	0.0152377	0.220978	0.0124498	-0.00916347	0.0396389	0.992081	0.0034527
gpeakneg4454	0.00912301	0.651323	0.020187	-0.0304428	0.0486888	0.992081	0.0034527
gpeakneg4456	-0.0305044	0.122229	0.0197378	-0.0691898	0.00818092	0.992081	0.0034527
gpeakneg4457	-0.0187663	0.453063	0.025011	-0.067787	0.0302545	0.992081	0.0034527
gpeakneg4472	0.0109015	0.603046	0.0209635	-0.0301861	0.0519892	0.992081	0.0034527
gpeakneg4474	0.0279964	0.00352003	0.00959355	0.00919335	0.0467994	0.635366	0.196976
gpeakneg4476	-0.00473735	0.84963	0.0249873	-0.0537115	0.0442368	0.992081	0.0034527
gpeakneg4477	0.0018956	0.92008	0.0188931	-0.0351341	0.0389253	0.996768	0.00140605
gpeakneg4494	-0.00123564	0.933724	0.0148586	-0.0303579	0.0278866	0.996768	0.00140605
gpeakneg4501	0.0397281	0.0357845	0.0189238	0.00263805	0.0768181	0.992081	0.0034527
gpeakneg4563	-0.0168743	0.215822	0.0136335	-0.0435954	0.00984677	0.992081	0.0034527
gpeakneg4574	0.0163878	0.300645	0.0158329	-0.014644	0.0474196	0.992081	0.0034527
gpeakneg4579	-0.0106083	0.60179	0.020329	-0.0504524	0.0292359	0.992081	0.0034527
gpeakneg4580	-0.0165257	0.216793	0.0133801	-0.0427502	0.00969873	0.992081	0.0034527
gpeakneg4581	-0.0169207	0.182662	0.0126975	-0.0418074	0.0079659	0.992081	0.0034527
gpeakneg4588	0.0333973	0.173899	0.0245608	-0.014741	0.0815355	0.992081	0.0034527
gpeakneg4593	-0.00287493	0.935844	0.035716	-0.0728771	0.0671272	0.996768	0.00140605
gpeakneg4606	0.00843481	0.830126	0.0393157	-0.0686226	0.0854922	0.992081	0.0034527
gpeakneg4623	0.037114	0.183374	0.0278961	-0.0175613	0.0917893	0.992081	0.0034527
gpeakneg4632	-0.02671	0.0487839	0.0135551	-0.0532775	-0.000142483	0.992081	0.0034527
gpeakneg4667	0.0144509	0.426934	0.0181898	-0.0212005	0.0501022	0.992081	0.0034527
gpeakneg4669	0.0113993	0.0298729	0.00524887	0.00111175	0.021687	0.992081	0.0034527
gpeakneg4671	-0.0311072	0.24368	0.0266823	-0.0834035	0.0211891	0.992081	0.0034527
gpeakneg4684	0.00555389	0.7862	0.0204753	-0.034577	0.0456847	0.992081	0.0034527
gpeakneg4685	0.00803338	0.339355	0.00840804	-0.00844609	0.0245128	0.992081	0.0034527
gpeakneg4687	-0.0234278	0.377562	0.0265501	-0.0754651	0.0286096	0.992081	0.0034527
gpeakneg4698	0.00947422	0.54349	0.0155943	-0.02109	0.0400385	0.992081	0.0034527
gpeakneg4702	0.00356804	0.862909	0.0206636	-0.0369319	0.044068	0.992081	0.0034527
gpeakneg4706	-0.021016	0.392333	0.0245688	-0.0691699	0.0271379	0.992081	0.0034527
gpeakneg4707	-0.000763873	0.968613	0.0194134	-0.0388135	0.0372858	0.996768	0.00140605
gpeakneg4715	0.00339496	0.832095	0.0160128	-0.0279895	0.0347794	0.992081	0.0034527
gpeakneg4721	0.0084778	0.708883	0.022707	-0.0360271	0.0529827	0.992081	0.0034527
gpeakneg4724	0.00351882	0.850785	0.0187055	-0.0331433	0.0401809	0.992081	0.0034527
gpeakneg4781	-0.0174059	0.312357	0.0172287	-0.0511736	0.0163617	0.992081	0.0034527
gpeakneg4782	-0.0158874	0.25003	0.0138118	-0.0429579	0.0111832	0.992081	0.0034527
gpeakneg4783	-0.0126299	0.434869	0.0161738	-0.0443299	0.0190701	0.992081	0.0034527
gpeakneg4797	-0.0234387	0.30936	0.0230567	-0.0686291	0.0217517	0.992081	0.0034527
gpeakneg4798	-0.0106278	0.508171	0.0160616	-0.042108	0.0208524	0.992081	0.0034527
gpeakneg4805	0.0265713	0.142306	0.0181095	-0.00892269	0.0620653	0.992081	0.0034527
gpeakneg4811	0.00695808	0.842666	0.035056	-0.0617503	0.0756665	0.992081	0.0034527
gpeakneg4821	0.0224895	0.50144	0.0334552	-0.0430816	0.0880606	0.992081	0.0034527
gpeakneg4831	-0.0164605	0.697145	0.0422957	-0.0993585	0.0664375	0.992081	0.0034527
gpeakneg4835	-0.00754036	0.599304	0.0143516	-0.035669	0.0205883	0.992081	0.0034527
gpeakneg4849	0.00175078	0.951075	0.0285343	-0.0541753	0.0576769	0.996768	0.00140605
gpeakneg4867	-0.0301264	0.0993838	0.0182823	-0.065959	0.00570619	0.992081	0.0034527
gpeakneg4872	0.0208514	0.304889	0.0203229	-0.0189807	0.0606834	0.992081	0.0034527
gpeakneg4889	-0.0152397	0.32343	0.0154337	-0.0454891	0.0150097	0.992081	0.0034527
gpeakneg4888	-0.0281939	0.331397	0.0290269	-0.0850856	0.0286977	0.992081	0.0034527
gpeakneg4904	-0.011337	0.46706	0.0155884	-0.0418897	0.0192157	0.992081	0.0034527
gpeakneg4906	-0.0301313	0.312076	0.0298071	-0.0885522	0.0282896	0.992081	0.0034527
gpeakneg4907	-0.0098539	0.675759	0.0235594	-0.0560295	0.0363217	0.992081	0.0034527
gpeakneg4920	0.00216373	0.946262	0.0321023	-0.0607555	0.065083	0.996768	0.00140605
gpeakneg4929	0.0164521	0.296422	0.0157567	-0.0144304	0.0473346	0.992081	0.0034527
gpeakneg4939	0.00300979	0.877145	0.0194696	-0.0351499	0.0411695	0.992081	0.0034527
gpeakneg4953	-0.0030655	0.856117	0.0169066	-0.0362018	0.0300708	0.992081	0.0034527
gpeakneg4958	-0.00700085	0.730195	0.0203002	-0.0467885	0.0327868	0.992081	0.0034527
gpeakneg4960	0.00192828	0.885214	0.0133572	-0.0242513	0.0281079	0.992081	0.0034527
gpeakneg5034	0.0196792	0.0535511	0.0101941	-0.000300871	0.0396592	0.992081	0.0034527
gpeakneg5040	0.0200959	0.555573	0.0340938	-0.0467267	0.0869186	0.992081	0.0034527
gpeakneg5049	0.0373071	0.0629595	0.0200632	-0.00201608	0.0766302	0.992081	0.0034527
gpeakneg5055	-0.00620466	0.812624	0.0261753	-0.0575074	0.045098	0.992081	0.0034527
gpeakneg5056	0.0255626	0.303609	0.0248488	-0.0231402	0.0742654	0.992081	0.0034527
gpeakneg5070	0.0299568	0.290571	0.0283449	-0.0255981	0.0855117	0.992081	0.0034527
gpeakneg5079	-0.021396	0.471239	0.0296974	-0.0796019	0.0368099	0.992081	0.0034527
gpeakneg5093	0.0424932	0.0322504	0.0198447	0.00359842	0.0813881	0.992081	0.0034527
gpeakneg5106	-0.000634634	0.978188	0.0232125	-0.0461303	0.044861	0.996768	0.00140605
gpeakneg5107	-3.9927e-05	0.998347	0.0192767	-0.0378216	0.0377417	0.998347	0.000718319
gpeakneg5123	-0.0133885	0.174065	0.00984986	-0.0326938	0.00591688	0.992081	0.0034527
gpeakneg5127	0.00664853	0.74257	0.020242	-0.0330251	0.0463222	0.992081	0.0034527
gpeakneg5145	-0.0232309	0.172382	0.0170241	-0.0565975	0.0101357	0.992081	0.0034527
gpeakneg5161	-0.0037849	0.868611	0.0228801	-0.0486291	0.0410593	0.992081	0.0034527
gpeakneg5173	0.00412749	0.860167	0.0234301	-0.0417947	0.0500497	0.992081	0.0034527
gpeakneg5174	-0.00710349	0.763622	0.023621	-0.0533998	0.0391928	0.992081	0.0034527
gpeakneg5187	0.00678041	0.607531	0.0132017	-0.0190945	0.0326553	0.992081	0.0034527
gpeakneg5189	0.0177709	0.445693	0.0233026	-0.0279013	0.0634432	0.992081	0.0034527
gpeakneg5190	0.0113931	0.553753	0.0192403	-0.0263173	0.0491034	0.992081	0.0034527
gpeakneg5191	0.0197506	0.294502	0.0188407	-0.0171764	0.0566776	0.992081	0.0034527
gpeakneg5207	0.00333016	0.745906	0.0102769	-0.0168123	0.0234726	0.992081	0.0034527
gpeakneg5209	0.00515802	0.756569	0.0166393	-0.0274544	0.0377704	0.992081	0.0034527
gpeakneg5218	-0.00742052	0.64092	0.0159098	-0.0386031	0.023762	0.992081	0.0034527
gpeakneg5285	0.0215642	0.0353632	0.0102483	0.00147791	0.0416504	0.992081	0.0034527
gpeakneg5292	0.00621707	0.765296	0.0208253	-0.0345998	0.0470339	0.992081	0.0034527
gpeakneg5302	0.0282475	0.0628446	0.0151844	-0.0015135	0.0580084	0.992081	0.0034527
gpeakneg5307	-0.00175402	0.930985	0.0202528	-0.0414489	0.0379408	0.996768	0.00140605
gpeakneg5316	0.0157748	0.394967	0.0185445	-0.0205718	0.0521214	0.992081	0.0034527
gpeakneg5322	0.0121567	0.516916	0.0187572	-0.0246068	0.0489201	0.992081	0.0034527
gpeakneg5323	0.0104523	0.464797	0.0142993	-0.0175737	0.0384784	0.992081	0.0034527
gpeakneg5331	-0.00588004	0.668955	0.0137518	-0.0328331	0.021073	0.992081	0.0034527
gpeakneg5336	0.000196049	0.985723	0.010956	-0.0212772	0.0216693	0.996768	0.00140605
gpeakneg5361	0.00502396	0.717388	0.0138802	-0.0221807	0.0322286	0.992081	0.0034527
gpeakneg5363	0.00550105	0.709401	0.0147615	-0.023431	0.0344331	0.992081	0.0034527
gpeakneg5373	0.00935547	0.663408	0.0214963	-0.0327765	0.0514874	0.992081	0.0034527
gpeakneg5385	0.0348739	0.107044	0.0216391	-0.00753782	0.0772857	0.992081	0.0034527
gpeakneg5386	0.00509066	0.719308	0.014165	-0.0226721	0.0328535	0.992081	0.0034527
gpeakneg5400	0.00700931	0.65403	0.0156398	-0.0236442	0.0376628	0.992081	0.0034527
gpeakneg5410	0.0193533	0.160569	0.0137926	-0.00767981	0.0463863	0.992081	0.0034527
gpeakneg5416	-0.00345226	0.794548	0.0132571	-0.0294357	0.0225312	0.992081	0.0034527
gpeakneg5450	-0.00991287	0.476454	0.0139222	-0.0371999	0.0173742	0.992081	0.0034527
gpeakneg5459	0.00860111	0.474188	0.0120181	-0.0149539	0.0321561	0.992081	0.0034527
gpeakneg5470	-0.0025775	0.868196	0.0155317	-0.0330191	0.0278641	0.992081	0.0034527
gpeakneg5502	0.0039357	0.629976	0.00816939	-0.012076	0.0199474	0.992081	0.0034527
gpeakneg5503	-0.00238169	0.709844	0.00640126	-0.0149279	0.0101645	0.992081	0.0034527
gpeakneg5513	0.0122348	0.318421	0.0122629	-0.0118001	0.0362697	0.992081	0.0034527
gpeakneg5512	0.00257281	0.823587	0.0115407	-0.0200465	0.0251922	0.992081	0.0034527
gpeakneg5524	0.0119979	0.447976	0.0158119	-0.0189928	0.0429887	0.992081	0.0034527
gpeakneg5547	0.0263178	0.119799	0.0169179	-0.00684069	0.0594763	0.992081	0.0034527
gpeakneg5546	4.19814e-05	0.997562	0.013741	-0.0268898	0.0269738	0.998347	0.000718319
gpeakneg5647	0.00837149	0.644992	0.01817	-0.0272411	0.0439841	0.992081	0.0034527
gpeakneg5660	0.00706442	0.529222	0.0112277	-0.0149415	0.0290703	0.992081	0.0034527
gpeakneg5675	0.00158256	0.865635	0.00935294	-0.0167489	0.019914	0.992081	0.0034527
gpeakneg5691	0.0110117	0.375423	0.0124235	-0.013338	0.0353614	0.992081	0.0034527
gpeakneg5701	0.00973051	0.437925	0.0125441	-0.0148556	0.0343166	0.992081	0.0034527

## Sheet: 08_lip_cov_med
lipid	coef	pval	se	ci_low	ci_high	FDR	log10_FDR
gpeakpos1999	0.00646234	0.446758	0.0084938	-0.0101852	0.0231099	0.951061	0.0217914
gpeakpos2041	-0.00661234	0.393967	0.0077569	-0.0218156	0.0085909	0.951061	0.0217914
gpeakpos2069	-0.00627361	0.601444	0.0120109	-0.0298146	0.0172674	0.951061	0.0217914
gpeakpos2099	-0.00506259	0.625643	0.010377	-0.025401	0.0152759	0.951061	0.0217914
gpeakpos2229	-0.00180744	0.889091	0.0129608	-0.0272101	0.0235952	0.986758	0.00578913
gpeakpos2348	-0.00483644	0.547002	0.00803049	-0.0205759	0.010903	0.951061	0.0217914
gpeakpos2417	-0.00392176	0.719666	0.010927	-0.0253383	0.0174948	0.951061	0.0217914
gpeakpos2561	-0.00392099	0.727636	0.0112584	-0.0259871	0.0181451	0.951061	0.0217914
gpeakpos2582	-0.0120133	0.187081	0.00910603	-0.0298607	0.00583423	0.951061	0.0217914
gpeakpos2688	-0.00106887	0.895099	0.0081064	-0.0169571	0.0148194	0.986758	0.00578913
gpeakpos2726	-0.00441875	0.668712	0.0103262	-0.0246578	0.0158203	0.951061	0.0217914
gpeakpos2767	-0.00607164	0.703537	0.0159549	-0.0373427	0.0251994	0.951061	0.0217914
gpeakpos3064	-0.00372495	0.552945	0.0062778	-0.0160292	0.00857932	0.951061	0.0217914
gpeakpos3098	-0.00993743	0.624155	0.0202817	-0.0496889	0.029814	0.951061	0.0217914
gpeakpos3375	-0.0101849	0.364061	0.0112211	-0.0321777	0.011808	0.951061	0.0217914
gpeakpos3419	-0.00562192	0.731035	0.0163547	-0.0376766	0.0264328	0.951061	0.0217914
gpeakpos3441	-0.0215594	0.252397	0.0188366	-0.0584784	0.0153597	0.951061	0.0217914
gpeakpos4188	-0.00999913	0.763198	0.0331884	-0.0750471	0.0550488	0.951061	0.0217914
gpeakpos4442	-0.035683	0.0732842	0.0199229	-0.0747311	0.00336512	0.951061	0.0217914
gpeakpos4465	-0.0371025	0.132652	0.0246737	-0.0854621	0.0112571	0.951061	0.0217914
gpeakpos4494	-0.00884813	0.668766	0.0206808	-0.0493818	0.0316855	0.951061	0.0217914
gpeakpos5151	-0.0200642	0.153955	0.0140733	-0.0476473	0.00751885	0.951061	0.0217914
gpeakpos5531	-0.0154296	0.434881	0.0197596	-0.0541577	0.0232985	0.951061	0.0217914
gpeakpos5562	-0.00408945	0.819835	0.0179553	-0.0392811	0.0311022	0.954662	0.0201506
gpeakpos5917	-0.0130232	0.364602	0.0143644	-0.0411769	0.0151305	0.951061	0.0217914
gpeakpos6622	-0.00291889	0.816068	0.0125487	-0.027514	0.0216762	0.954425	0.0202582
gpeakpos7122	0.0132249	0.513948	0.0202617	-0.0264874	0.0529371	0.951061	0.0217914
gpeakpos7158	0.0134399	0.423194	0.0167812	-0.0194506	0.0463304	0.951061	0.0217914
gpeakpos7470	0.00323746	0.42348	0.00404481	-0.00469023	0.0111651	0.951061	0.0217914
gpeakpos7514	0.00202409	0.592555	0.00378238	-0.00538923	0.00943742	0.951061	0.0217914
gpeakpos7549	-0.00134813	0.90387	0.0111625	-0.0232262	0.0205299	0.986758	0.00578913
gpeakpos7586	0.0175996	0.30631	0.017204	-0.0161196	0.0513189	0.951061	0.0217914
gpeakpos7730	0.00428374	0.353738	0.00461927	-0.00476986	0.0133374	0.951061	0.0217914
gpeakpos7769	0.00427209	0.308591	0.00419579	-0.00395151	0.0124957	0.951061	0.0217914
gpeakpos7961	0.00309431	0.482631	0.00440737	-0.00554397	0.0117326	0.951061	0.0217914
gpeakpos7997	0.00274152	0.525201	0.00431499	-0.0057157	0.0111987	0.951061	0.0217914
gpeakpos8043	0.00272371	0.504748	0.00408329	-0.0052794	0.0107268	0.951061	0.0217914
gpeakpos8324	0.00278535	0.581556	0.00505404	-0.00712038	0.0126911	0.951061	0.0217914
gpeakpos8631	0.00253524	0.628056	0.00523307	-0.00772139	0.0127919	0.951061	0.0217914
gpeakpos8679	0.00164828	0.74022	0.00497125	-0.0080952	0.0113917	0.951061	0.0217914
gpeakpos8733	0.0019751	0.704245	0.00520315	-0.00822289	0.0121731	0.951061	0.0217914
gpeakpos9000	0.00249346	0.708077	0.00665918	-0.0105583	0.0155452	0.951061	0.0217914
gpeakpos9264	0.00286984	0.635766	0.00605929	-0.00900614	0.0147458	0.951061	0.0217914
gpeakpos9328	0.00309167	0.60737	0.00601689	-0.00870122	0.0148846	0.951061	0.0217914
gpeakpos9390	0.00217646	0.737873	0.00650329	-0.0105698	0.0149227	0.951061	0.0217914
gpeakpos9446	0.00171427	0.799027	0.00673302	-0.0114822	0.0149108	0.951061	0.0217914
gpeakpos9505	0.000577533	0.942305	0.00797999	-0.015063	0.016218	0.989418	0.0046201
gpeakpos9794	0.000410375	0.955316	0.00732394	-0.0139443	0.014765	0.993859	0.00267509
gpeakpos9863	0.00190408	0.797185	0.00740911	-0.0126175	0.0164257	0.951061	0.0217914
gpeakpos9918	0.00258513	0.712498	0.00701522	-0.0111644	0.0163347	0.951061	0.0217914
gpeakpos10107	-6.34279e-05	0.992506	0.00675281	-0.0132987	0.0131718	0.995464	0.0019746
gpeakpos10171	0.0017907	0.793536	0.00684199	-0.0116194	0.0152008	0.951061	0.0217914
gpeakpos10236	0.00233441	0.783552	0.00849826	-0.0143219	0.0189907	0.951061	0.0217914
gpeakpos10371	-0.000448888	0.962445	0.00953349	-0.0191342	0.0182364	0.99472	0.00229935
gpeakpos10445	0.00222127	0.881528	0.0149046	-0.0269913	0.0314338	0.986758	0.00578913
gpeakpos10660	-4.91852e-05	0.995464	0.00865094	-0.0170047	0.0169063	0.995464	0.0019746
gpeakpos10723	0.00349045	0.723243	0.00985646	-0.0158279	0.0228088	0.951061	0.0217914
gpeakpos10860	0.00275022	0.768307	0.00933575	-0.0155475	0.021048	0.951061	0.0217914
gpeakpos10926	0.00929742	0.331247	0.00956914	-0.00945775	0.0280526	0.951061	0.0217914
gpeakpos11003	0.000925573	0.897069	0.00715473	-0.0130974	0.0149486	0.986758	0.00578913
gpeakpos11076	-0.000518896	0.949428	0.00818131	-0.016554	0.0155162	0.99346	0.00284966
gpeakpos11134	0.0042029	0.700078	0.0109105	-0.0171813	0.0255872	0.951061	0.0217914
gpeakpos11200	0.00885336	0.582261	0.0160946	-0.0226914	0.0403981	0.951061	0.0217914
gpeakpos11253	0.00193965	0.910223	0.0172021	-0.0317758	0.0356551	0.986758	0.00578913
gpeakpos11314	0.0032247	0.816946	0.0139311	-0.0240797	0.0305291	0.954425	0.0202582
gpeakpos11389	0.00481712	0.706109	0.0127746	-0.0202205	0.0298548	0.951061	0.0217914
gpeakpos11522	-0.000933103	0.928514	0.0104007	-0.0213182	0.019452	0.987154	0.00561529
gpeakpos11585	0.00571795	0.650266	0.0126115	-0.0190001	0.030436	0.951061	0.0217914
gpeakpos11639	0.0124413	0.386502	0.0143667	-0.015717	0.0405995	0.951061	0.0217914
gpeakpos11690	0.00786742	0.561004	0.013533	-0.0186567	0.0343916	0.951061	0.0217914
gpeakpos11823	-0.00195928	0.813187	0.00829095	-0.0182092	0.0142907	0.954425	0.0202582
gpeakpos11828	0.00446281	0.667218	0.0103794	-0.0158804	0.024806	0.951061	0.0217914
gpeakpos11905	-0.000445874	0.961447	0.00922404	-0.0185247	0.0176329	0.99472	0.00229935
gpeakpos11964	0.00325496	0.78745	0.0120722	-0.0204062	0.0269161	0.951061	0.0217914
gpeakpos12022	0.014253	0.427977	0.0179812	-0.0209896	0.0494955	0.951061	0.0217914
gpeakpos12080	0.0258548	0.353778	0.0278822	-0.0287933	0.080503	0.951061	0.0217914
gpeakpos12125	0.0234034	0.366683	0.0259259	-0.0274104	0.0742172	0.951061	0.0217914
gpeakpos12192	0.00186936	0.848049	0.00975618	-0.0172524	0.0209911	0.97049	0.0130091
gpeakpos12323	0.00454127	0.61343	0.00898934	-0.0130775	0.0221601	0.951061	0.0217914
gpeakpos12430	0.0100284	0.519982	0.0155872	-0.020522	0.0405787	0.951061	0.0217914
gpeakpos12484	0.0175774	0.256768	0.0154995	-0.0128011	0.047956	0.951061	0.0217914
gpeakpos12743	0.0118985	0.335818	0.0123625	-0.0123316	0.0361286	0.951061	0.0217914
gpeakpos12792	0.0176176	0.260558	0.015659	-0.0130736	0.0483087	0.951061	0.0217914
gpeakpos12841	0.026958	0.162243	0.0192892	-0.0108482	0.0647642	0.951061	0.0217914
gpeakpos12892	0.0304603	0.159006	0.0216272	-0.0119283	0.0728489	0.951061	0.0217914
gpeakpos12955	0.0142851	0.163198	0.0102446	-0.00579403	0.0343642	0.951061	0.0217914
gpeakpos13012	0.00477522	0.615311	0.0095028	-0.0138499	0.0234004	0.951061	0.0217914
gpeakpos13066	0.00638428	0.58191	0.0115952	-0.0163419	0.0291104	0.951061	0.0217914
gpeakpos13118	0.00832382	0.5912	0.0154978	-0.0220513	0.0386989	0.951061	0.0217914
gpeakpos13174	0.00994869	0.530925	0.0158774	-0.0211704	0.0410678	0.951061	0.0217914
gpeakpos13342	0.00647314	0.497433	0.00953989	-0.0122247	0.025171	0.951061	0.0217914
gpeakpos13459	0.0205735	0.180782	0.0153723	-0.00955562	0.0507026	0.951061	0.0217914
gpeakpos13500	0.0270315	0.14508	0.0185512	-0.00932815	0.0633911	0.951061	0.0217914
gpeakpos13549	0.028795	0.0737255	0.0161017	-0.00276387	0.0603538	0.951061	0.0217914
gpeakpos13594	0.0305768	0.0841885	0.0177063	-0.00412699	0.0652806	0.951061	0.0217914
gpeakpos13728	0.0102085	0.347446	0.0108653	-0.011087	0.0315041	0.951061	0.0217914
gpeakpos13775	0.0123886	0.320259	0.0124643	-0.0120409	0.0368181	0.951061	0.0217914
gpeakpos13980	0.0104354	0.29194	0.00990191	-0.008972	0.0298428	0.951061	0.0217914
gpeakpos14026	0.0142234	0.241265	0.0121378	-0.00956618	0.038013	0.951061	0.0217914
gpeakpos14078	0.0201121	0.170934	0.0146888	-0.0086775	0.0489017	0.951061	0.0217914
gpeakpos14294	0.0283375	0.127895	0.0186131	-0.00814342	0.0648185	0.951061	0.0217914
gpeakneg291	0.00797597	0.427963	0.010062	-0.0117452	0.0276971	0.951061	0.0217914
gpeakneg300	-0.00791312	0.46024	0.0107158	-0.0289158	0.0130895	0.951061	0.0217914
gpeakneg372	0.00314773	0.710464	0.00847912	-0.013471	0.0197665	0.951061	0.0217914
gpeakneg378	-0.00896194	0.5348	0.0144386	-0.037261	0.0193371	0.951061	0.0217914
gpeakneg391	0.0102826	0.369118	0.0114489	-0.0121569	0.032722	0.951061	0.0217914
gpeakneg437	-0.00431303	0.575807	0.00770845	-0.0194213	0.0107953	0.951061	0.0217914
gpeakneg451	-0.00686941	0.621158	0.0138998	-0.0341125	0.0203736	0.951061	0.0217914
gpeakneg731	-0.0176282	0.187296	0.0133687	-0.0438304	0.00857395	0.951061	0.0217914
gpeakneg1173	-0.0132582	0.20258	0.0104048	-0.0336513	0.00713491	0.951061	0.0217914
gpeakneg1346	-0.00122082	0.886994	0.00859072	-0.0180583	0.0156167	0.986758	0.00578913
gpeakneg1472	0.00822829	0.394555	0.0096646	-0.010714	0.0271706	0.951061	0.0217914
gpeakneg1488	0.00439741	0.681908	0.010729	-0.0166311	0.025426	0.951061	0.0217914
gpeakneg1516	0.00473944	0.693071	0.012008	-0.0187958	0.0282746	0.951061	0.0217914
gpeakneg1533	0.00102742	0.929729	0.0116506	-0.0218074	0.0238622	0.987154	0.00561529
gpeakneg1541	-0.00805273	0.618908	0.0161897	-0.0397839	0.0236785	0.951061	0.0217914
gpeakneg1580	0.00573886	0.696802	0.0147286	-0.0231286	0.0346063	0.951061	0.0217914
gpeakneg1638	0.00794785	0.223842	0.00653405	-0.00485864	0.0207543	0.951061	0.0217914
gpeakneg1645	0.00267854	0.750802	0.00843417	-0.0138521	0.0192092	0.951061	0.0217914
gpeakneg1652	0.00727799	0.415275	0.00893393	-0.0102322	0.0247882	0.951061	0.0217914
gpeakneg1661	0.00995053	0.299756	0.0095959	-0.00885709	0.0287582	0.951061	0.0217914
gpeakneg1677	-0.0033126	0.803528	0.0133152	-0.0294099	0.0227847	0.951061	0.0217914
gpeakneg1699	0.0026118	0.864697	0.0153276	-0.0274298	0.0326534	0.982181	0.00780858
gpeakneg1723	0.00683855	0.55674	0.0116363	-0.0159682	0.0296453	0.951061	0.0217914
gpeakneg1722	0.00628593	0.490364	0.00911361	-0.0115764	0.0241483	0.951061	0.0217914
gpeakneg1737	0.00679721	0.385014	0.00782462	-0.00853877	0.0221332	0.951061	0.0217914
gpeakneg1778	0.00468414	0.392533	0.00547832	-0.00605317	0.0154215	0.951061	0.0217914
gpeakneg1793	0.00363311	0.539032	0.00591445	-0.007959	0.0152252	0.951061	0.0217914
gpeakneg1860	0.00801883	0.106105	0.0049623	-0.0017071	0.0177448	0.951061	0.0217914
gpeakneg2026	-0.00820997	0.283167	0.00764975	-0.0232032	0.00678327	0.951061	0.0217914
gpeakneg2039	-0.0155928	0.29294	0.0148263	-0.0446519	0.0134663	0.951061	0.0217914
gpeakneg2174	-0.0121452	0.132009	0.00806335	-0.0279491	0.00365863	0.951061	0.0217914
gpeakneg2200	-0.0106728	0.314394	0.0106086	-0.0314653	0.0101198	0.951061	0.0217914
gpeakneg2206	-0.00376036	0.724841	0.0106829	-0.0246985	0.0171778	0.951061	0.0217914
gpeakneg2319	-0.0118258	0.20031	0.00923408	-0.0299243	0.00627267	0.951061	0.0217914
gpeakneg2333	-0.0120055	0.405881	0.0144442	-0.0403156	0.0163046	0.951061	0.0217914
gpeakneg2339	-0.0109311	0.312968	0.0108334	-0.0321641	0.010302	0.951061	0.0217914
gpeakneg2428	-0.00308646	0.76795	0.0104606	-0.0235888	0.0174159	0.951061	0.0217914
gpeakneg2429	-0.0276502	0.0572489	0.014542	-0.0561519	0.000851558	0.951061	0.0217914
gpeakneg2515	-0.0189982	0.22794	0.0157573	-0.0498819	0.0118854	0.951061	0.0217914
gpeakneg2552	-0.0219882	0.176524	0.016269	-0.0538749	0.00989857	0.951061	0.0217914
gpeakneg2559	-0.0438301	0.0812303	0.0251378	-0.0930994	0.00543913	0.951061	0.0217914
gpeakneg2635	-0.0252282	0.129928	0.016659	-0.0578793	0.00742292	0.951061	0.0217914
gpeakneg2637	0.00700319	0.659033	0.0158713	-0.024104	0.0381104	0.951061	0.0217914
gpeakneg2660	-0.0229453	0.0778248	0.0130116	-0.0484475	0.00255697	0.951061	0.0217914
gpeakneg2668	-0.0295421	0.0751008	0.0165981	-0.0620737	0.00298957	0.951061	0.0217914
gpeakneg2680	-0.0299482	0.157473	0.0211854	-0.0714709	0.0115745	0.951061	0.0217914
gpeakneg2698	-0.0438206	0.0472245	0.0220839	-0.0871042	-0.000537012	0.951061	0.0217914
gpeakneg2744	-0.0192551	0.0741077	0.0107815	-0.0403864	0.00187615	0.951061	0.0217914
gpeakneg2747	0.00719878	0.725599	0.0205102	-0.0330004	0.0473979	0.951061	0.0217914
gpeakneg2762	-0.0217047	0.110801	0.0136114	-0.0483825	0.00497304	0.951061	0.0217914
gpeakneg2765	0.0291917	0.118368	0.0186927	-0.00744537	0.0658287	0.951061	0.0217914
gpeakneg2787	-0.0195205	0.0982287	0.0118055	-0.0426589	0.00361794	0.951061	0.0217914
gpeakneg2795	-0.0324671	0.0785223	0.0184543	-0.068637	0.00370266	0.951061	0.0217914
gpeakneg2811	-0.0246159	0.141584	0.0167464	-0.0574382	0.0082065	0.951061	0.0217914
gpeakneg2822	-0.0177807	0.271651	0.016175	-0.0494831	0.0139217	0.951061	0.0217914
gpeakneg2832	-0.0228814	0.128458	0.0150514	-0.0523816	0.00661891	0.951061	0.0217914
gpeakneg2886	0.00507796	0.727516	0.0145737	-0.023486	0.0336419	0.951061	0.0217914
gpeakneg2895	0.0129654	0.349118	0.0138474	-0.0141751	0.0401059	0.951061	0.0217914
gpeakneg2900	-0.0302188	0.0454382	0.015105	-0.0598241	-0.000613426	0.951061	0.0217914
gpeakneg2914	-0.0217045	0.137529	0.0146153	-0.0503498	0.00694091	0.951061	0.0217914
gpeakneg2927	-0.00712198	0.561687	0.0122722	-0.031175	0.016931	0.951061	0.0217914
gpeakneg3029	0.000101203	0.990581	0.00857258	-0.0167008	0.0169032	0.995464	0.0019746
gpeakneg3053	0.0294586	0.00617441	0.0107577	0.0083739	0.0505434	0.846453	0.0723974
gpeakneg3071	0.00179443	0.839962	0.00888589	-0.0156216	0.0192105	0.968774	0.0137774
gpeakneg3239	-0.00556307	0.394885	0.0065387	-0.0183787	0.00725255	0.951061	0.0217914
gpeakneg3247	0.00361534	0.736338	0.0107373	-0.0174294	0.0246601	0.951061	0.0217914
gpeakneg3252	0.0117579	0.290016	0.0111124	-0.010022	0.0335378	0.951061	0.0217914
gpeakneg3257	0.0122104	0.328329	0.0124917	-0.0122728	0.0366936	0.951061	0.0217914
gpeakneg3264	0.0124686	0.452464	0.0165957	-0.0200584	0.0449956	0.951061	0.0217914
gpeakneg3268	0.0103754	0.425516	0.0130198	-0.015143	0.0358938	0.951061	0.0217914
gpeakneg3276	0.0135417	0.178118	0.0100564	-0.00616854	0.033252	0.951061	0.0217914
gpeakneg3285	-0.00674134	0.404188	0.00808155	-0.0225809	0.0090982	0.951061	0.0217914
gpeakneg3402	0.00922703	0.347648	0.00982476	-0.0100291	0.0284832	0.951061	0.0217914
gpeakneg3463	-0.00331577	0.790661	0.012491	-0.0277977	0.0211662	0.951061	0.0217914
gpeakneg3495	0.00575067	0.706642	0.0152793	-0.0241962	0.0356975	0.951061	0.0217914
gpeakneg3514	0.0045918	0.697195	0.0118008	-0.0185373	0.0277209	0.951061	0.0217914
gpeakneg3531	0.0140838	0.411642	0.0171543	-0.019538	0.0477056	0.951061	0.0217914
gpeakneg3534	-0.00672394	0.63684	0.014242	-0.0346377	0.0211898	0.951061	0.0217914
gpeakneg3543	0.0229993	0.0773653	0.0130221	-0.00252344	0.0485221	0.951061	0.0217914
gpeakneg3566	0.00552976	0.586363	0.0101629	-0.0143891	0.0254486	0.951061	0.0217914
gpeakneg3609	-0.0147411	0.184857	0.0111174	-0.0365308	0.0070486	0.951061	0.0217914
gpeakneg3625	0.00789326	0.483151	0.0112561	-0.0141683	0.0299548	0.951061	0.0217914
gpeakneg3647	0.0137293	0.182969	0.0103099	-0.00647764	0.0339363	0.951061	0.0217914
gpeakneg3666	0.00185623	0.849342	0.0097718	-0.0172961	0.0210086	0.97049	0.0130091
gpeakneg3680	-0.00713568	0.46884	0.0098509	-0.0264431	0.0121717	0.951061	0.0217914
gpeakneg3685	0.00783563	0.451008	0.0103957	-0.0125396	0.0282109	0.951061	0.0217914
gpeakneg3687	0.0116231	0.286078	0.0108957	-0.00973198	0.0329782	0.951061	0.0217914
gpeakneg3706	0.0205613	0.0999709	0.0124993	-0.0039369	0.0450594	0.951061	0.0217914
gpeakneg3714	0.00191214	0.849514	0.0100778	-0.01784	0.0216643	0.97049	0.0130091
gpeakneg3735	-0.0166724	0.1344	0.0111374	-0.0385013	0.00515652	0.951061	0.0217914
gpeakneg3762	-0.00355245	0.802564	0.0142081	-0.0313998	0.0242949	0.951061	0.0217914
gpeakneg3786	0.00604924	0.46343	0.00825034	-0.0101211	0.0222196	0.951061	0.0217914
gpeakneg3819	-0.00687162	0.716041	0.0188908	-0.0438969	0.0301537	0.951061	0.0217914
gpeakneg3824	-0.0104563	0.227054	0.00865603	-0.0274218	0.00650918	0.951061	0.0217914
gpeakneg3836	-0.0109547	0.163839	0.0078682	-0.0263761	0.00446669	0.951061	0.0217914
gpeakneg3839	0.0048281	0.645877	0.0105074	-0.0157659	0.0254221	0.951061	0.0217914
gpeakneg3840	0.0094627	0.161307	0.00675574	-0.00377831	0.0227037	0.951061	0.0217914
gpeakneg3846	0.00130555	0.942825	0.0182036	-0.0343728	0.0369839	0.989418	0.0046201
gpeakneg3852	-0.00200843	0.802978	0.00804996	-0.0177861	0.0137692	0.951061	0.0217914
gpeakneg3855	-0.000783143	0.954669	0.013777	-0.0277856	0.0262193	0.993859	0.00267509
gpeakneg3872	0.0152878	0.232158	0.0127951	-0.00979011	0.0403658	0.951061	0.0217914
gpeakneg3892	0.00715306	0.448684	0.00944162	-0.0113522	0.0256583	0.951061	0.0217914
gpeakneg3913	0.00740422	0.555452	0.0125578	-0.0172086	0.0320171	0.951061	0.0217914
gpeakneg3935	0.0116797	0.251858	0.010193	-0.00829829	0.0316576	0.951061	0.0217914
gpeakneg3944	-0.00978254	0.549088	0.016328	-0.0417848	0.0222197	0.951061	0.0217914
gpeakneg3952	-0.0102634	0.490399	0.0148815	-0.0394305	0.0189038	0.951061	0.0217914
gpeakneg3953	-0.0201623	0.0983702	0.0121988	-0.0440716	0.00374696	0.951061	0.0217914
gpeakneg3966	0.00241438	0.908903	0.0211006	-0.0389421	0.0437708	0.986758	0.00578913
gpeakneg3974	0.011258	0.42502	0.0141123	-0.0164016	0.0389176	0.951061	0.0217914
gpeakneg3993	0.0160011	0.227512	0.0132592	-0.00998645	0.0419887	0.951061	0.0217914
gpeakneg3994	0.0201618	0.196984	0.015627	-0.0104665	0.0507902	0.951061	0.0217914
gpeakneg4012	0.0239284	0.0264531	0.010781	0.002798	0.0450587	0.951061	0.0217914
gpeakneg4014	0.00747461	0.566625	0.013044	-0.0180912	0.0330404	0.951061	0.0217914
gpeakneg4047	-0.0103346	0.5238	0.0162112	-0.0421079	0.0214387	0.951061	0.0217914
gpeakneg4062	0.0295444	0.375933	0.0333679	-0.0358554	0.0949442	0.951061	0.0217914
gpeakneg4069	-0.0107728	0.412049	0.0131329	-0.0365129	0.0149672	0.951061	0.0217914
gpeakneg4077	0.0589581	0.151031	0.0410601	-0.0215181	0.139434	0.951061	0.0217914
gpeakneg4079	0.00923918	0.435607	0.0118507	-0.0139877	0.0324661	0.951061	0.0217914
gpeakneg4081	-0.0113248	0.286471	0.0106247	-0.0321487	0.00949918	0.951061	0.0217914
gpeakneg4101	0.0215121	0.0845151	0.0124703	-0.00292922	0.0459534	0.951061	0.0217914
gpeakneg4106	-0.010752	0.466206	0.0147557	-0.0396726	0.0181686	0.951061	0.0217914
gpeakneg4124	0.0333979	0.0241086	0.014808	0.00437473	0.0624211	0.951061	0.0217914
gpeakneg4141	0.0139911	0.226496	0.0115683	-0.00868239	0.0366646	0.951061	0.0217914
gpeakneg4151	-0.020294	0.0431291	0.0100343	-0.0399609	-0.000627085	0.951061	0.0217914
gpeakneg4172	-0.013811	0.281368	0.0128205	-0.0389388	0.0113169	0.951061	0.0217914
gpeakneg4181	0.00490403	0.813823	0.0208241	-0.0359105	0.0457186	0.954425	0.0202582
gpeakneg4187	-0.0120753	0.377329	0.013678	-0.0388837	0.0147331	0.951061	0.0217914
gpeakneg4189	-0.0121856	0.49732	0.017954	-0.0473749	0.0230036	0.951061	0.0217914
gpeakneg4200	0.0223242	0.254352	0.0195853	-0.0160623	0.0607107	0.951061	0.0217914
gpeakneg4210	0.0268535	0.0202922	0.0115703	0.00417616	0.0495309	0.951061	0.0217914
gpeakneg4215	-0.00231959	0.942204	0.0319945	-0.0650277	0.0603885	0.989418	0.0046201
gpeakneg4239	0.0239188	0.00292314	0.00803801	0.00816455	0.039673	0.846453	0.0723974
gpeakneg4244	0.00795436	0.78592	0.0292857	-0.0494445	0.0653532	0.951061	0.0217914
gpeakneg4292	-0.00406377	0.757663	0.0131705	-0.0298775	0.0217499	0.951061	0.0217914
gpeakneg4304	0.0024593	0.908496	0.0213971	-0.0394782	0.0443968	0.986758	0.00578913
gpeakneg4319	0.022979	0.422921	0.0286749	-0.0332228	0.0791809	0.951061	0.0217914
gpeakneg4321	0.00995243	0.411989	0.0121312	-0.0138243	0.0337292	0.951061	0.0217914
gpeakneg4323	-0.017788	0.282933	0.0165662	-0.0502573	0.0146812	0.951061	0.0217914
gpeakneg4333	0.0139105	0.597236	0.0263266	-0.0376887	0.0655096	0.951061	0.0217914
gpeakneg4339	0.0103644	0.382804	0.0118756	-0.0129115	0.0336402	0.951061	0.0217914
gpeakneg4342	-0.00833846	0.584206	0.015237	-0.0382024	0.0215255	0.951061	0.0217914
gpeakneg4359	0.0284748	0.0117237	0.0112979	0.00633124	0.0506184	0.846453	0.0723974
gpeakneg4360	0.0175125	0.0762762	0.00987894	-0.00184983	0.0368749	0.951061	0.0217914
gpeakneg4363	0.0365962	0.29921	0.0352521	-0.0324966	0.105689	0.951061	0.0217914
gpeakneg4380	0.0247702	0.0111173	0.00975591	0.00564894	0.0438914	0.846453	0.0723974
gpeakneg4417	-0.00866813	0.354271	0.00935743	-0.0270084	0.00967209	0.951061	0.0217914
gpeakneg4438	0.00322216	0.768526	0.0109484	-0.0182363	0.0246806	0.951061	0.0217914
gpeakneg4439	-0.0571978	0.0620227	0.0306505	-0.117272	0.00287595	0.951061	0.0217914
gpeakneg4448	0.0108218	0.427132	0.0136276	-0.0158878	0.0375314	0.951061	0.0217914
gpeakneg4454	-0.00318889	0.880895	0.0212827	-0.0449023	0.0385245	0.986758	0.00578913
gpeakneg4456	-0.0308904	0.1393	0.0208945	-0.0718428	0.010062	0.951061	0.0217914
gpeakneg4457	-0.0325522	0.204967	0.0256817	-0.0828873	0.017783	0.951061	0.0217914
gpeakneg4472	0.00857132	0.705176	0.0226549	-0.0358315	0.0529742	0.951061	0.0217914
gpeakneg4474	0.0286142	0.00728659	0.0106632	0.00771472	0.0495137	0.846453	0.0723974
gpeakneg4476	-0.0132064	0.597314	0.0249995	-0.0622045	0.0357917	0.951061	0.0217914
gpeakneg4477	-0.00695211	0.713432	0.0189301	-0.0440545	0.0301503	0.951061	0.0217914
gpeakneg4494	-0.00933356	0.551997	0.0156927	-0.0400907	0.0214236	0.951061	0.0217914
gpeakneg4501	0.0332452	0.0859381	0.0193599	-0.0046994	0.0711899	0.951061	0.0217914
gpeakneg4563	-0.0151278	0.303567	0.0147042	-0.0439475	0.0136918	0.951061	0.0217914
gpeakneg4574	0.0116767	0.477354	0.0164329	-0.0205313	0.0438847	0.951061	0.0217914
gpeakneg4579	-0.00343779	0.868241	0.020723	-0.0440541	0.0371785	0.982555	0.00764296
gpeakneg4580	-0.0158701	0.273464	0.0144916	-0.0442731	0.012533	0.951061	0.0217914
gpeakneg4581	-0.0260068	0.0388063	0.0125866	-0.050676	-0.00133759	0.951061	0.0217914
gpeakneg4588	0.0358569	0.16915	0.0260789	-0.0152568	0.0869706	0.951061	0.0217914
gpeakneg4593	-0.00380671	0.918758	0.0373214	-0.0769554	0.069342	0.987154	0.00561529
gpeakneg4606	0.0125324	0.764766	0.0418825	-0.0695558	0.0946206	0.951061	0.0217914
gpeakneg4623	0.0461436	0.109653	0.0288442	-0.0103899	0.102677	0.951061	0.0217914
gpeakneg4632	-0.0237527	0.087396	0.0138962	-0.0509887	0.00348332	0.951061	0.0217914
gpeakneg4667	0.0125767	0.496677	0.0185026	-0.0236877	0.0488412	0.951061	0.0217914
gpeakneg4669	0.00680145	0.203181	0.00534478	-0.00367412	0.017277	0.951061	0.0217914
gpeakneg4671	-0.02808	0.303422	0.0272854	-0.0815583	0.0253983	0.951061	0.0217914
gpeakneg4684	-0.00620814	0.768326	0.0210756	-0.0475156	0.0350993	0.951061	0.0217914
gpeakneg4685	0.0031226	0.718	0.00864667	-0.0138246	0.0200698	0.951061	0.0217914
gpeakneg4687	-0.0350565	0.195496	0.0270813	-0.0881349	0.0180219	0.951061	0.0217914
gpeakneg4698	-0.00188692	0.909558	0.0166108	-0.0344435	0.0306697	0.986758	0.00578913
gpeakneg4702	-0.00611301	0.773598	0.02125	-0.0477622	0.0355361	0.951061	0.0217914
gpeakneg4706	-0.0275898	0.273136	0.0251762	-0.0769343	0.0217546	0.951061	0.0217914
gpeakneg4707	-0.00652703	0.742686	0.0198814	-0.0454938	0.0324397	0.951061	0.0217914
gpeakneg4715	-0.000692874	0.967182	0.0168409	-0.0337005	0.0323147	0.994738	0.0022915
gpeakneg4721	0.00520207	0.826581	0.0237442	-0.0413357	0.0517398	0.956397	0.0193618
gpeakneg4724	-0.00212627	0.910145	0.0188405	-0.039053	0.0348005	0.986758	0.00578913
gpeakneg4781	-0.0112888	0.541424	0.0184862	-0.047521	0.0249434	0.951061	0.0217914
gpeakneg4782	-0.011798	0.413123	0.0144158	-0.0400524	0.0164564	0.951061	0.0217914
gpeakneg4783	-0.0211189	0.184251	0.0159054	-0.052293	0.0100552	0.951061	0.0217914
gpeakneg4797	-0.0278638	0.251498	0.0242988	-0.0754886	0.0197609	0.951061	0.0217914
gpeakneg4798	-0.0232861	0.141967	0.015857	-0.0543652	0.00779307	0.951061	0.0217914
gpeakneg4805	0.0143319	0.46894	0.0197898	-0.0244554	0.0531191	0.951061	0.0217914
gpeakneg4811	0.00022829	0.995021	0.0365858	-0.0714785	0.0719351	0.995464	0.0019746
gpeakneg4821	0.0183824	0.602592	0.0353048	-0.0508137	0.0875785	0.951061	0.0217914
gpeakneg4831	-0.0149688	0.738886	0.044907	-0.102985	0.0730473	0.951061	0.0217914
gpeakneg4835	0.00155815	0.915595	0.0147018	-0.0272569	0.0303732	0.987154	0.00561529
gpeakneg4849	0.0084006	0.784813	0.0307655	-0.0518987	0.0686999	0.951061	0.0217914
gpeakneg4867	-0.0324041	0.0795429	0.0184813	-0.0686268	0.0038186	0.951061	0.0217914
gpeakneg4872	0.0225369	0.29746	0.0216307	-0.0198585	0.0649323	0.951061	0.0217914
gpeakneg4889	-0.0138915	0.383973	0.0159563	-0.0451653	0.0173822	0.951061	0.0217914
gpeakneg4888	-0.0346004	0.231273	0.0289039	-0.0912509	0.0220501	0.951061	0.0217914
gpeakneg4904	-0.0172207	0.303605	0.0167397	-0.0500299	0.0155885	0.951061	0.0217914
gpeakneg4906	-0.0290752	0.325374	0.0295638	-0.0870191	0.0288687	0.951061	0.0217914
gpeakneg4907	-0.0160127	0.494523	0.02344	-0.0619543	0.0299289	0.951061	0.0217914
gpeakneg4920	-0.021049	0.513785	0.0322365	-0.0842313	0.0421334	0.951061	0.0217914
gpeakneg4929	0.00909565	0.594282	0.0170765	-0.0243737	0.042565	0.951061	0.0217914
gpeakneg4939	-0.0159376	0.441853	0.0207233	-0.0565545	0.0246793	0.951061	0.0217914
gpeakneg4953	-0.0222832	0.213347	0.0179066	-0.0573795	0.0128131	0.951061	0.0217914
gpeakneg4958	-0.0165821	0.431348	0.021073	-0.0578845	0.0247203	0.951061	0.0217914
gpeakneg4960	-0.00656972	0.640358	0.014062	-0.0341306	0.0209912	0.951061	0.0217914
gpeakneg5034	0.020032	0.0651583	0.0108623	-0.00125779	0.0413217	0.951061	0.0217914
gpeakneg5040	0.0396716	0.267569	0.0357828	-0.0304614	0.109805	0.951061	0.0217914
gpeakneg5049	0.0195324	0.373973	0.0219698	-0.0235276	0.0625923	0.951061	0.0217914
gpeakneg5055	0.000694851	0.979751	0.0273763	-0.0529616	0.0543513	0.995464	0.0019746
gpeakneg5056	0.0239822	0.358486	0.0261171	-0.0272065	0.0751708	0.951061	0.0217914
gpeakneg5070	0.0249023	0.40145	0.0296798	-0.0332689	0.0830736	0.951061	0.0217914
gpeakneg5079	-0.0177367	0.585363	0.0325106	-0.0814564	0.0459829	0.951061	0.0217914
gpeakneg5093	0.0419298	0.0401172	0.0204283	0.00189118	0.0819685	0.951061	0.0217914
gpeakneg5106	0.00760278	0.756666	0.024536	-0.040487	0.0556925	0.951061	0.0217914
gpeakneg5107	-0.0105638	0.600929	0.020196	-0.0501472	0.0290196	0.951061	0.0217914
gpeakneg5123	-0.014612	0.163795	0.0104939	-0.0351797	0.00595577	0.951061	0.0217914
gpeakneg5127	0.00546603	0.799993	0.0215745	-0.0368192	0.0477512	0.951061	0.0217914
gpeakneg5145	-0.0209335	0.237661	0.0177275	-0.0556787	0.0138116	0.951061	0.0217914
gpeakneg5161	-0.0117863	0.612809	0.02329	-0.0574338	0.0338612	0.951061	0.0217914
gpeakneg5173	-0.00656037	0.79154	0.0248206	-0.0552078	0.042087	0.951061	0.0217914
gpeakneg5174	-0.0138579	0.561696	0.0238796	-0.0606611	0.0329453	0.951061	0.0217914
gpeakneg5187	-0.000253008	0.985755	0.0141706	-0.0280269	0.0275209	0.995464	0.0019746
gpeakneg5189	-0.00945197	0.691966	0.0238573	-0.0562113	0.0373074	0.951061	0.0217914
gpeakneg5190	0.000217324	0.991508	0.0204182	-0.0398015	0.0402362	0.995464	0.0019746
gpeakneg5191	0.00625934	0.744502	0.0192065	-0.0313847	0.0439034	0.951061	0.0217914
gpeakneg5207	-0.00136723	0.900674	0.0109544	-0.0228375	0.0201031	0.986758	0.00578913
gpeakneg5209	-0.0013269	0.940552	0.0177925	-0.0361995	0.0335457	0.989418	0.0046201
gpeakneg5218	0.000494083	0.976095	0.016489	-0.0318237	0.0328119	0.995464	0.0019746
gpeakneg5285	0.0155399	0.137972	0.010476	-0.00499263	0.0360724	0.951061	0.0217914
gpeakneg5292	0.0144136	0.519656	0.0223856	-0.0294614	0.0582886	0.951061	0.0217914
gpeakneg5302	0.019943	0.209842	0.0159035	-0.0112273	0.0511134	0.951061	0.0217914
gpeakneg5307	-0.00195133	0.927699	0.0215046	-0.0440997	0.040197	0.987154	0.00561529
gpeakneg5316	0.0177538	0.35565	0.0192206	-0.0199179	0.0554254	0.951061	0.0217914
gpeakneg5322	0.00906116	0.640549	0.0194058	-0.0289735	0.0470958	0.951061	0.0217914
gpeakneg5323	0.00951571	0.520974	0.0148255	-0.0195418	0.0385732	0.951061	0.0217914
gpeakneg5331	0.00340897	0.803308	0.0136869	-0.0234169	0.0302349	0.951061	0.0217914
gpeakneg5336	-0.00541774	0.642462	0.0116696	-0.0282898	0.0174543	0.951061	0.0217914
gpeakneg5361	-0.00544982	0.705641	0.0144283	-0.0337288	0.0228292	0.951061	0.0217914
gpeakneg5363	-0.00142766	0.924057	0.0149769	-0.0307819	0.0279266	0.987154	0.00561529
gpeakneg5373	0.000696294	0.97545	0.0226266	-0.043651	0.0450436	0.995464	0.0019746
gpeakneg5385	0.0108687	0.623834	0.0221619	-0.0325678	0.0543052	0.951061	0.0217914
gpeakneg5386	-0.00534696	0.72302	0.0150863	-0.0349156	0.0242216	0.951061	0.0217914
gpeakneg5400	-0.00546955	0.736687	0.0162666	-0.0373515	0.0264124	0.951061	0.0217914
gpeakneg5410	0.019124	0.180755	0.0142883	-0.00888062	0.0471286	0.951061	0.0217914
gpeakneg5416	-0.00670335	0.636316	0.0141763	-0.0344884	0.0210817	0.951061	0.0217914
gpeakneg5450	-0.0191705	0.205871	0.0151545	-0.0488728	0.0105318	0.951061	0.0217914
gpeakneg5459	0.013298	0.301228	0.0128632	-0.0119133	0.0385093	0.951061	0.0217914
gpeakneg5470	-0.00786013	0.643895	0.0170037	-0.0411868	0.0254665	0.951061	0.0217914
gpeakneg5502	0.000153769	0.986095	0.00882309	-0.0171392	0.0174467	0.995464	0.0019746
gpeakneg5503	-0.00430685	0.527659	0.00681914	-0.0176721	0.00905841	0.951061	0.0217914
gpeakneg5513	0.000549016	0.96441	0.012304	-0.0235664	0.0246644	0.99472	0.00229935
gpeakneg5512	0.00308246	0.801728	0.0122753	-0.0209766	0.0271416	0.951061	0.0217914
gpeakneg5524	0.00273282	0.86519	0.016097	-0.0288167	0.0342824	0.982181	0.00780858
gpeakneg5547	0.0106238	0.525491	0.0167329	-0.022172	0.0434196	0.951061	0.0217914
gpeakneg5546	-0.0083858	0.558007	0.014315	-0.0364427	0.0196711	0.951061	0.0217914
gpeakneg5647	-0.0121184	0.525996	0.0191103	-0.049574	0.0253371	0.951061	0.0217914
gpeakneg5660	0.00177755	0.879209	0.0116966	-0.0211474	0.0247025	0.986758	0.00578913
gpeakneg5675	-0.00223401	0.822437	0.00995498	-0.0217454	0.0172774	0.954662	0.0201506
gpeakneg5691	-0.00117993	0.927498	0.0129672	-0.0265951	0.0242353	0.987154	0.00561529
gpeakneg5701	0.003277	0.802896	0.013129	-0.0224554	0.0290094	0.951061	0.0217914

## Sheet: 09_lip_cov_med_diag
lipid	coef	pval	se	ci_low	ci_high	FDR	log10_FDR
gpeakpos1999	-3.59268e-05	0.996557	0.00832615	-0.0163549	0.016283	1	0
gpeakpos2041	-0.00685724	0.337928	0.00715587	-0.0208825	0.00716802	1	0
gpeakpos2069	-0.00310061	0.784434	0.0113349	-0.0253166	0.0191154	1	0
gpeakpos2099	-0.0039031	0.688723	0.00974342	-0.0229999	0.0151937	1	0
gpeakpos2229	0.00122239	0.917909	0.01186	-0.0220229	0.0244676	1	0
gpeakpos2348	-0.00204556	0.790186	0.00768809	-0.0171139	0.0130228	1	0
gpeakpos2417	-0.000331314	0.973966	0.0101524	-0.0202296	0.0195669	1	0
gpeakpos2561	-0.00322725	0.759126	0.0105249	-0.0238558	0.0174013	1	0
gpeakpos2582	-0.0099054	0.242074	0.00846746	-0.0265013	0.00669052	1	0
gpeakpos2688	0.00222115	0.769458	0.00757855	-0.0126325	0.0170748	1	0
gpeakpos2726	-0.0029983	0.754811	0.00960064	-0.0218152	0.0158186	1	0
gpeakpos2767	0.00114672	0.937458	0.0146143	-0.0274968	0.0297903	1	0
gpeakpos3064	-0.00236482	0.693165	0.0059935	-0.0141119	0.00938223	1	0
gpeakpos3098	-0.0050371	0.792869	0.0191826	-0.0426344	0.0325601	1	0
gpeakpos3375	-0.00325335	0.762415	0.0107616	-0.0243457	0.017839	1	0
gpeakpos3419	-0.00461246	0.768999	0.0157055	-0.0353946	0.0261697	1	0
gpeakpos3441	-0.02312	0.198207	0.0179688	-0.0583382	0.0120982	1	0
gpeakpos4188	-0.0188678	0.563586	0.0326702	-0.0829002	0.0451646	1	0
gpeakpos4442	-0.0441437	0.0209232	0.0191151	-0.0816085	-0.00667885	1	0
gpeakpos4465	-0.0437174	0.0652522	0.023714	-0.0901959	0.00276121	1	0
gpeakpos4494	-0.016387	1	inf	-inf	inf	1	0
gpeakpos5151	-0.0288097	0.034413	0.0136203	-0.0555051	-0.00211436	1	0
gpeakpos5531	-0.0308382	0.104376	0.018989	-0.068056	0.00637964	1	0
gpeakpos5562	-0.0112997	0.519599	0.0175472	-0.0456915	0.0230921	1	0
gpeakpos5917	-0.0221333	0.112272	0.0139373	-0.04945	0.00518333	1	0
gpeakpos6622	-0.00297124	0.801245	0.011803	-0.0261046	0.0201622	1	0
gpeakpos7122	0.0106221	0.58225	0.0193094	-0.0272236	0.0484679	1	0
gpeakpos7158	0.0167423	0.309712	0.0164814	-0.0155607	0.0490453	1	0
gpeakpos7470	-0.00105861	0.790217	0.00397932	-0.00885793	0.00674071	1	0
gpeakpos7514	-0.0019705	0.591389	0.00367066	-0.00916485	0.00522386	1	0
gpeakpos7549	-0.00255451	0.815512	0.0109485	-0.0240131	0.0189041	1	0
gpeakpos7586	0.0183735	0.295662	0.0175692	-0.0160614	0.0528084	1	0
gpeakpos7730	-0.000107927	0.98111	0.00455826	-0.00904196	0.0088261	1	0
gpeakpos7769	0.000160787	0.969085	0.00414872	-0.00797056	0.00829213	1	0
gpeakpos7961	-0.00162323	0.709211	0.0043528	-0.0101546	0.00690811	1	0
gpeakpos7997	-0.00154859	0.712986	0.00420986	-0.00979976	0.00670258	1	0
gpeakpos8043	-0.00147476	0.710559	0.00397398	-0.00926362	0.00631409	1	0
gpeakpos8324	-0.00163123	0.744603	0.0050074	-0.0114456	0.0081831	1	0
gpeakpos8631	-0.00264525	0.603948	0.00509945	-0.01264	0.0073495	1	0
gpeakpos8679	-0.00270168	0.577046	0.00484429	-0.0121963	0.00679296	1	0
gpeakpos8733	-0.00135731	0.787484	0.0050349	-0.0112255	0.00851093	1	0
gpeakpos9000	-0.00333925	0.613661	0.00661429	-0.016303	0.00962452	1	0
gpeakpos9264	-0.00493153	0.413501	0.00603062	-0.0167513	0.00688827	1	0
gpeakpos9328	-0.00380583	0.521438	0.00593612	-0.0154404	0.00782876	1	0
gpeakpos9390	-0.00366926	0.565145	0.00637893	-0.0161717	0.00883321	1	0
gpeakpos9446	-0.00307902	0.638758	0.00655897	-0.0159344	0.00977633	1	0
gpeakpos9505	-0.00205788	0.78922	0.00769808	-0.0171458	0.0130301	1	0
gpeakpos9794	-0.00544946	0.446712	0.00716179	-0.0194863	0.00858739	1	0
gpeakpos9863	-0.00295046	0.683071	0.00722661	-0.0171144	0.0112134	1	0
gpeakpos9918	-0.00126987	0.851997	0.00680639	-0.0146101	0.0120704	1	0
gpeakpos10107	-0.00780707	0.243426	0.00669292	-0.020925	0.00531082	1	0
gpeakpos10171	-0.00664341	0.330741	0.00683041	-0.0200308	0.00674396	1	0
gpeakpos10236	-0.00639302	0.449543	0.00845438	-0.0229633	0.0101773	1	0
gpeakpos10371	-0.0049507	0.590805	0.0092077	-0.0229975	0.0130961	1	0
gpeakpos10445	0.000926094	0.947691	0.0141158	-0.0267403	0.0285925	1	0
gpeakpos10660	-0.00715838	0.394116	0.00840012	-0.0236223	0.00930554	1	0
gpeakpos10723	-0.00434397	0.65441	0.00970407	-0.0233636	0.0146757	1	0
gpeakpos10860	-0.00317801	0.726036	0.00906959	-0.0209541	0.0145981	1	0
gpeakpos10926	0.00478651	0.608289	0.00933922	-0.013518	0.023091	1	0
gpeakpos11003	-0.00841513	0.237526	0.00712426	-0.0223784	0.00554816	1	0
gpeakpos11076	-0.0097657	0.229632	0.00812922	-0.0256987	0.00616728	1	0
gpeakpos11134	-0.00636633	0.558283	0.0108753	-0.0276815	0.0149489	1	0
gpeakpos11200	-0.00399766	0.802123	0.0159524	-0.0352637	0.0272684	1	0
gpeakpos11253	-0.00897451	0.598212	0.0170303	-0.0423532	0.0244042	1	0
gpeakpos11314	-0.00532545	0.695004	0.0135828	-0.0319472	0.0212963	1	0
gpeakpos11389	0.0030595	0.80474	0.0123758	-0.0211965	0.0273155	1	0
gpeakpos11522	-0.00977788	0.338026	0.0102058	-0.0297809	0.0102251	1	0
gpeakpos11585	-0.00599648	0.63389	0.0125908	-0.030674	0.018681	1	0
gpeakpos11639	-0.000357383	0.980163	0.0143735	-0.0285289	0.0278142	1	0
gpeakpos11690	-0.00326017	0.80945	0.0135201	-0.0297591	0.0232387	1	0
gpeakpos11823	-0.0116593	0.15552	0.00820906	-0.0277488	0.00443012	1	0
gpeakpos11828	0.00106874	0.914827	0.0099927	-0.0185166	0.0206541	1	0
gpeakpos11905	-0.0121821	0.183771	0.00916476	-0.0301447	0.0057805	1	0
gpeakpos11964	-0.0098887	0.414255	0.0121121	-0.033628	0.0138506	1	0
gpeakpos12022	-0.00273209	0.878751	0.0179092	-0.0378335	0.0323693	1	0
gpeakpos12080	0.00452202	0.869351	0.0274924	-0.049362	0.0584061	1	0
gpeakpos12125	-0.00470168	0.85788	0.0262556	-0.0561617	0.0467583	1	0
gpeakpos12192	-0.0066867	0.479725	0.00946127	-0.0252305	0.0118571	1	0
gpeakpos12323	-0.0044392	0.620073	0.00895459	-0.0219899	0.0131115	1	0
gpeakpos12430	-0.00394714	0.799804	0.0155643	-0.0344527	0.0265584	1	0
gpeakpos12484	0.000624066	0.968483	0.0157948	-0.0303332	0.0315813	1	0
gpeakpos12743	-0.00391408	0.753817	0.0124807	-0.0283758	0.0205477	1	0
gpeakpos12792	-0.00176565	0.911943	0.015966	-0.0330585	0.0295272	1	0
gpeakpos12841	0.00400083	0.840323	0.0198571	-0.0349184	0.0429201	1	0
gpeakpos12892	0.00232001	0.918416	0.0226498	-0.0420729	0.0467129	1	0
gpeakpos12955	0.00186955	0.855748	0.0102841	-0.018287	0.0220261	1	0
gpeakpos13012	-0.00504966	0.58695	0.00929509	-0.0232677	0.0131684	1	0
gpeakpos13066	-0.00495783	0.664259	0.0114225	-0.0273455	0.0174298	1	0
gpeakpos13118	-0.00476521	0.754151	0.015216	-0.0345881	0.0250577	1	0
gpeakpos13174	-0.00313971	0.841475	0.015698	-0.0339072	0.0276278	1	0
gpeakpos13342	-0.00475266	0.616682	0.00949472	-0.023362	0.0138566	1	0
gpeakpos13459	0.00272367	0.860142	0.0154584	-0.0275742	0.0330216	1	0
gpeakpos13500	0.00573875	0.762295	0.018973	-0.0314477	0.0429252	1	0
gpeakpos13549	0.00854007	0.615897	0.0170231	-0.0248247	0.0419048	1	0
gpeakpos13594	0.0118415	0.522067	0.0184976	-0.0244131	0.0480961	1	0
gpeakpos13728	5.79402e-05	0.995653	0.0106344	-0.0207851	0.0209009	1	0
gpeakpos13775	0.000948008	0.938352	0.0122574	-0.023076	0.024972	1	0
gpeakpos13980	0.000123004	0.989878	0.00969572	-0.0188803	0.0191263	1	0
gpeakpos14026	0.00155153	0.897026	0.0119883	-0.0219452	0.0250482	1	0
gpeakpos14078	0.00414645	0.778077	0.0147128	-0.0246901	0.032983	1	0
gpeakpos14294	0.00497767	0.803946	0.0200515	-0.0343226	0.0442779	1	0
gpeakneg291	0.00242492	0.802159	0.00967821	-0.016544	0.0213939	1	0
gpeakneg300	-0.0100767	0.321685	0.0101682	-0.0300059	0.00985258	1	0
gpeakneg372	-0.00175034	0.830313	0.00816772	-0.0177588	0.0142581	1	0
gpeakneg378	0.00145181	0.915015	0.0136045	-0.0252125	0.0281162	1	0
gpeakneg391	0.0144539	0.205878	0.0114262	-0.007941	0.0368489	1	0
gpeakneg437	-0.00353857	0.62953	0.00733552	-0.0179159	0.0108388	1	0
gpeakneg451	0.00186229	0.889227	0.0133706	-0.0243436	0.0280682	1	0
gpeakneg731	-0.00904271	0.476843	0.0127113	-0.0339565	0.0158711	1	0
gpeakneg1173	-0.00949876	0.359306	0.010362	-0.029808	0.0108105	1	0
gpeakneg1346	0.00460717	0.575034	0.00821751	-0.0114988	0.0207132	1	0
gpeakneg1472	0.00595549	0.498573	0.00880031	-0.0112928	0.0232038	1	0
gpeakneg1488	0.000563827	0.954573	0.00989773	-0.0188354	0.019963	1	0
gpeakneg1516	0.0124743	0.282569	0.0116086	-0.0102783	0.0352268	1	0
gpeakneg1533	0.00857084	0.445224	0.0112272	-0.013434	0.0305757	1	0
gpeakneg1541	0.00127326	0.9334	0.0152361	-0.028589	0.0311356	1	0
gpeakneg1580	-0.00182974	0.895815	0.0139729	-0.0292161	0.0255566	1	0
gpeakneg1638	0.00502652	0.422285	0.00626385	-0.00725041	0.0173034	1	0
gpeakneg1645	-0.000284224	0.971362	0.00791701	-0.0158013	0.0152328	1	0
gpeakneg1652	0.00307102	0.715009	0.00841058	-0.0134134	0.0195554	1	0
gpeakneg1661	0.00500086	0.579482	0.00902451	-0.0126868	0.0226886	1	0
gpeakneg1677	0.00283069	0.821283	0.012531	-0.0217296	0.027391	1	0
gpeakneg1699	0.00524247	0.724448	0.0148714	-0.023905	0.0343899	1	0
gpeakneg1723	0.00569917	0.61403	0.0113005	-0.0164494	0.0278477	1	0
gpeakneg1722	0.00653304	0.452601	0.00869812	-0.010515	0.023581	1	0
gpeakneg1737	0.00512919	0.489677	0.00742475	-0.00942306	0.0196814	1	0
gpeakneg1778	0.00276558	0.604013	0.00533239	-0.00768571	0.0132169	1	0
gpeakneg1793	0.00147026	0.795247	0.00566568	-0.00963427	0.0125748	1	0
gpeakneg1860	0.00645975	0.184859	0.00487182	-0.00308884	0.0160083	1	0
gpeakneg2026	-0.00734049	0.298842	0.0070655	-0.0211886	0.00650763	1	0
gpeakneg2039	-0.0171878	0.21703	0.0139233	-0.0444769	0.0101013	1	0
gpeakneg2174	-0.0135055	0.0782697	0.00767002	-0.0285385	0.00152748	1	0
gpeakneg2200	-0.0107789	0.282831	0.0100364	-0.0304498	0.00889204	1	0
gpeakneg2206	-0.00729003	0.471301	0.0101199	-0.0271247	0.0125447	1	0
gpeakneg2319	-0.0140589	0.0979074	0.00849434	-0.0307075	0.00258975	1	0
gpeakneg2333	-0.0123482	0.368895	0.0137424	-0.0392828	0.0145864	1	0
gpeakneg2339	-0.00975309	0.326314	0.00993626	-0.0292278	0.00972163	1	0
gpeakneg2428	-0.00141349	0.885779	0.00984004	-0.0206996	0.0178726	1	0
gpeakneg2429	-0.0215534	0.116259	0.0137224	-0.0484487	0.00534201	1	0
gpeakneg2515	-0.0174876	0.237821	0.0148144	-0.0465232	0.011548	1	0
gpeakneg2552	-0.0188513	0.202851	0.0148031	-0.0478649	0.0101622	1	0
gpeakneg2559	-0.0436867	0.0597035	0.0232009	-0.0891596	0.00178617	1	0
gpeakneg2635	-0.0247358	0.122806	0.0160299	-0.0561539	0.00668226	1	0
gpeakneg2637	0.00652134	0.670725	0.0153388	-0.0235422	0.0365849	1	0
gpeakneg2660	-0.022681	0.0660185	0.0123381	-0.0468632	0.00150112	1	0
gpeakneg2668	-0.0256886	0.11246	0.0161845	-0.0574096	0.00603251	1	0
gpeakneg2680	-0.028192	0.164948	0.0203021	-0.0679834	0.0115995	1	0
gpeakneg2698	-0.0433401	0.0359764	0.0206658	-0.0838443	-0.00283597	1	0
gpeakneg2744	-0.0162768	0.117642	0.0104022	-0.0366648	0.00411114	1	0
gpeakneg2747	0.0063675	0.743237	0.0194386	-0.0317315	0.0444665	1	0
gpeakneg2762	-0.0222869	0.0758155	0.0125524	-0.0468892	0.00231549	1	0
gpeakneg2765	0.0169149	0.358543	0.0184229	-0.0191933	0.0530231	1	0
gpeakneg2787	-0.0207486	0.0574024	0.010919	-0.0421495	0.00065219	1	0
gpeakneg2795	-0.0274747	0.12985	0.0181388	-0.063026	0.00807666	1	0
gpeakneg2811	-0.0200145	0.199899	0.0156139	-0.0506171	0.0105881	1	0
gpeakneg2822	-0.0186812	0.238777	0.0158577	-0.0497618	0.0123994	1	0
gpeakneg2832	-0.0210883	0.134258	0.0140822	-0.0486889	0.00651224	1	0
gpeakneg2886	-0.00308999	0.824149	0.0139056	-0.0303444	0.0241645	1	0
gpeakneg2895	0.00214241	0.873268	0.0134312	-0.0241823	0.0284671	1	0
gpeakneg2900	-0.0281893	0.0560445	0.0147535	-0.0571055	0.000726964	1	0
gpeakneg2914	-0.0182188	0.193136	0.0139999	-0.0456581	0.00922042	1	0
gpeakneg2927	-0.00404317	0.727716	0.0116128	-0.0268039	0.0187175	1	0
gpeakneg3029	-0.00477419	0.564117	0.00827794	-0.0209986	0.0114503	1	0
gpeakneg3053	0.0183858	0.0855559	0.0106936	-0.00257335	0.039345	1	0
gpeakneg3071	-0.00291869	0.73716	0.00869652	-0.0199636	0.0141262	1	0
gpeakneg3239	-0.00787872	0.20595	0.00622932	-0.020088	0.00433053	1	0
gpeakneg3247	-0.0052328	0.618175	0.0104984	-0.0258093	0.0153437	1	0
gpeakneg3252	0.0109417	0.303807	0.0106406	-0.00991338	0.0317969	1	0
gpeakneg3257	-0.000187101	0.98785	0.0122866	-0.0242684	0.0238942	1	0
gpeakneg3264	0.00365118	0.818274	0.0158909	-0.0274944	0.0347967	1	0
gpeakneg3268	-0.00280319	0.830101	0.0130641	-0.0284084	0.022802	1	0
gpeakneg3276	0.00403329	0.686995	0.0100098	-0.0155855	0.023652	1	0
gpeakneg3285	-0.0123948	0.112269	0.00780492	-0.0276922	0.00290253	1	0
gpeakneg3402	0.00151291	0.881364	0.0101374	-0.018356	0.0213818	1	0
gpeakneg3463	-0.00182647	0.874332	0.0115483	-0.0244608	0.0208079	1	0
gpeakneg3495	0.00246265	0.862172	0.0141849	-0.0253393	0.0302646	1	0
gpeakneg3514	0.00578538	0.602106	0.0110964	-0.0159632	0.027534	1	0
gpeakneg3531	0.00432667	0.797853	0.0168926	-0.0287823	0.0374357	1	0
gpeakneg3534	-0.000304969	0.981474	0.0131337	-0.0260466	0.0254366	1	0
gpeakneg3543	0.00710129	0.591765	0.0132418	-0.0188521	0.0330547	1	0
gpeakneg3566	-0.00208497	0.832277	0.00984487	-0.0213805	0.0172106	1	0
gpeakneg3609	-0.0123778	0.235561	0.0104352	-0.0328305	0.00807489	1	0
gpeakneg3625	0.00476386	0.658614	0.0107822	-0.0163688	0.0258965	1	0
gpeakneg3647	0.00809102	0.414922	0.00992443	-0.0113605	0.0275425	1	0
gpeakneg3666	0.00274847	0.768497	0.0093377	-0.0155531	0.02105	1	0
gpeakneg3680	-0.0105927	0.256604	0.0093373	-0.0288935	0.00770803	1	0
gpeakneg3685	-0.00157094	0.876578	0.0101149	-0.0213959	0.018254	1	0
gpeakneg3687	0.00681966	0.519465	0.0105867	-0.01393	0.0275693	1	0
gpeakneg3706	0.013815	0.244485	0.0118701	-0.00944992	0.0370799	1	0
gpeakneg3714	-0.00438653	0.655096	0.00981999	-0.0236334	0.0148603	1	0
gpeakneg3735	-0.0130691	0.196489	0.0101184	-0.0329009	0.0067626	1	0
gpeakneg3762	-0.00328	1	inf	-inf	inf	1	0
gpeakneg3786	0.0025827	0.749234	0.0080798	-0.0132534	0.0184188	1	0
gpeakneg3819	-0.00486108	0.779539	0.017366	-0.0388977	0.0291756	1	0
gpeakneg3824	-0.00714022	0.382981	0.00818441	-0.0231814	0.00890094	1	0
gpeakneg3836	-0.0130282	0.0841008	0.00754223	-0.0278107	0.00175426	1	0
gpeakneg3839	0.00157632	0.87903	0.010357	-0.018723	0.0218756	1	0
gpeakneg3840	0.00211342	0.757193	0.00683581	-0.0112845	0.0155114	1	0
gpeakneg3846	0.00914706	1	inf	-inf	inf	1	0
gpeakneg3852	-0.00459189	0.54605	0.00760638	-0.0195001	0.0103163	1	0
gpeakneg3855	-0.00205894	0.878355	0.0134524	-0.0284251	0.0243072	1	0
gpeakneg3872	0.0115517	0.355925	0.0125132	-0.0129738	0.0360771	1	0
gpeakneg3892	0.000598842	0.947951	0.00917345	-0.0173808	0.0185785	1	0
gpeakneg3913	9.71657e-05	0.993657	0.0122225	-0.0238585	0.0240529	1	0
gpeakneg3935	0.00291254	0.76714	0.00983573	-0.0163651	0.0221902	1	0
gpeakneg3944	-0.00707767	0.64682	0.0154472	-0.0373537	0.0231983	1	0
gpeakneg3952	-0.0121344	0.389484	0.0141007	-0.0397713	0.0155025	1	0
gpeakneg3953	-0.0228402	0.041176	0.0111866	-0.0447655	-0.000914941	1	0
gpeakneg3966	0.00490798	0.808342	0.0202337	-0.0347493	0.0445652	1	0
gpeakneg3974	0.00612888	0.648698	0.0134532	-0.0202388	0.0324966	1	0
gpeakneg3993	0.0116042	0.360255	0.0126839	-0.0132557	0.0364641	1	0
gpeakneg3994	0.0192541	0.182192	0.014433	-0.00903404	0.0475423	1	0
gpeakneg4012	0.0198885	0.0610213	0.0106166	-0.000919636	0.0406966	1	0
gpeakneg4014	0.0103531	0.403643	0.012397	-0.0139445	0.0346508	1	0
gpeakneg4047	-0.0113678	0.456482	0.015266	-0.0412886	0.0185529	1	0
gpeakneg4062	0.0320783	0.311779	0.0317137	-0.0300795	0.0942361	1	0
gpeakneg4069	-0.0103126	0.41305	0.0125988	-0.0350058	0.0143806	1	0
gpeakneg4077	0.0427055	0.276793	0.0392675	-0.0342574	0.119668	1	0
gpeakneg4079	0.00514524	0.654207	0.0114868	-0.0173686	0.027659	1	0
gpeakneg4081	-0.0103384	0.300645	0.00998827	-0.029915	0.00923829	1	0
gpeakneg4101	0.015079	0.216143	0.0121914	-0.00881579	0.0389737	1	0
gpeakneg4106	-0.00680036	0.626762	0.0139842	-0.0342089	0.0206081	1	0
gpeakneg4124	0.026214	0.070821	0.0145099	-0.00222496	0.0546529	1	0
gpeakneg4141	0.010006	0.377848	0.0113464	-0.0122325	0.0322445	1	0
gpeakneg4151	-0.0176003	0.062012	0.00943102	-0.0360847	0.000884196	1	0
gpeakneg4172	-0.0163254	0.176006	0.0120647	-0.0399717	0.00732093	1	0
gpeakneg4181	0.00115994	0.953686	0.0199717	-0.0379839	0.0403037	1	0
gpeakneg4187	-0.0115383	0.386445	0.0133224	-0.0376496	0.0145731	1	0
gpeakneg4189	-0.00750406	0.657987	0.0169509	-0.0407272	0.0257191	1	0
gpeakneg4200	0.0198824	0.297953	0.0191024	-0.0175576	0.0573225	1	0
gpeakneg4210	0.0215438	0.0546919	0.011213	-0.000433363	0.0435209	1	0
gpeakneg4215	0.0159182	0.616836	0.0318149	-0.0464378	0.0782742	1	0
gpeakneg4239	0.0224737	0.00276422	0.00750925	0.00775589	0.0371916	0.997885	0.000919441
gpeakneg4244	0.0153886	0.592011	0.0287141	-0.04089	0.0716672	1	0
gpeakneg4292	-0.00561094	0.650985	0.0124028	-0.0299199	0.018698	1	0
gpeakneg4304	-0.00275779	0.893694	0.0206373	-0.0432062	0.0376906	1	0
gpeakneg4319	0.00919317	0.731287	0.0267699	-0.0432749	0.0616612	1	0
gpeakneg4321	0.00435301	0.713493	0.0118556	-0.0188835	0.0275895	1	0
gpeakneg4323	-0.0145722	0.341821	0.0153299	-0.0446182	0.0154739	1	0
gpeakneg4333	-0.00763233	0.761476	0.0251441	-0.0569139	0.0416492	1	0
gpeakneg4339	0.00393582	0.734865	0.0116217	-0.0188423	0.0267139	1	0
gpeakneg4342	-0.00868627	0.540572	0.0141944	-0.0365069	0.0191343	1	0
gpeakneg4359	0.0235799	0.0314672	0.0109617	0.00209534	0.0450645	1	0
gpeakneg4360	0.0160632	0.096783	0.00967279	-0.00289516	0.0350215	1	0
gpeakneg4363	0.038705	0.259022	0.0342915	-0.0285052	0.105915	1	0
gpeakneg4380	0.0216068	0.0209086	0.00935508	0.00327116	0.0399424	1	0
gpeakneg4417	-0.00942165	0.297977	0.00905247	-0.0271642	0.00832086	1	0
gpeakneg4438	-0.000371812	0.971725	0.0104899	-0.0209316	0.0201879	1	0
gpeakneg4439	-0.0430115	0.1567	0.0303699	-0.102535	0.0165123	1	0
gpeakneg4448	0.00890114	0.491285	0.0129327	-0.0164465	0.0342488	1	0
gpeakneg4454	0.00403392	0.840701	0.0200696	-0.0353017	0.0433695	1	0
gpeakneg4456	-0.0305955	0.124294	0.019906	-0.0696105	0.00841959	1	0
gpeakneg4457	-0.0261665	0.292668	0.0248663	-0.0749036	0.0225706	1	0
gpeakneg4472	0.00500329	0.814109	0.0212789	-0.0367027	0.0467093	1	0
gpeakneg4474	0.0241007	0.0148261	0.0098911	0.00471445	0.0434869	1	0
gpeakneg4476	-0.0142126	0.561072	0.0244518	-0.0621373	0.0337121	1	0
gpeakneg4477	-0.00183992	0.921756	0.0187322	-0.0385543	0.0348745	1	0
gpeakneg4494	-0.00519097	0.730729	0.0150832	-0.0347535	0.0243716	1	0
gpeakneg4501	0.0350117	0.061612	0.0187321	-0.00170248	0.0717258	1	0
gpeakneg4563	-0.0154085	0.264462	0.0138081	-0.0424718	0.0116548	1	0
gpeakneg4574	0.0133588	0.392652	0.0156277	-0.0172709	0.0439885	1	0
gpeakneg4579	-0.0108887	0.588335	0.0201177	-0.0503186	0.0285412	1	0
gpeakneg4580	-0.0145215	0.28325	0.013533	-0.0410457	0.0120026	1	0
gpeakneg4581	-0.019437	0.124795	0.0126629	-0.0442558	0.00538185	1	0
gpeakneg4588	0.0259654	0.292812	0.0246826	-0.0224116	0.0743424	1	0
gpeakneg4593	-0.00428375	0.903439	0.0353103	-0.0734906	0.0649231	1	0
gpeakneg4606	0.00311369	0.936686	0.0391978	-0.0737126	0.07994	1	0
gpeakneg4623	0.0368446	0.188503	0.0280183	-0.0180702	0.0917594	1	0
gpeakneg4632	-0.0271611	0.047115	0.0136814	-0.0539761	-0.000346151	1	0
gpeakneg4667	0.0126798	0.482559	0.0180574	-0.0227121	0.0480716	1	0
gpeakneg4669	0.00940741	0.0736098	0.00525838	-0.00089883	0.0197136	1	0
gpeakneg4671	-0.0296231	0.265472	0.0266023	-0.0817627	0.0225165	1	0
gpeakneg4684	-0.000240762	0.990499	0.0202191	-0.0398694	0.0393879	1	0
gpeakneg4685	0.00202017	0.812027	0.00849481	-0.0146294	0.0186697	1	0
gpeakneg4687	-0.0275784	0.296227	0.026402	-0.0793254	0.0241685	1	0
gpeakneg4698	0.00236517	0.880468	0.0157284	-0.028462	0.0331923	1	0
gpeakneg4702	-0.00392376	0.848815	0.020583	-0.0442658	0.0364183	1	0
gpeakneg4706	-0.028982	0.23239	0.0242685	-0.0765473	0.0185833	1	0
gpeakneg4707	-0.00619047	0.74717	0.0192028	-0.0438272	0.0314463	1	0
gpeakneg4715	0.00114954	0.943036	0.0160876	-0.0303816	0.0326807	1	0
gpeakneg4721	0.000572646	0.980046	0.0228955	-0.0443016	0.0454469	1	0
gpeakneg4724	-0.00262332	0.887203	0.0184943	-0.0388715	0.0336249	1	0
gpeakneg4781	-0.0168034	0.330927	0.017283	-0.0506774	0.0170707	1	0
gpeakneg4782	-0.0160298	0.248092	0.0138786	-0.0432314	0.0111719	1	0
gpeakneg4783	-0.0135117	0.399385	0.0160334	-0.0449366	0.0179132	1	0
gpeakneg4797	-0.0247022	0.282211	0.0229709	-0.0697244	0.0203201	1	0
gpeakneg4798	-0.0156328	0.333885	0.0161777	-0.0473404	0.0160749	1	0
gpeakneg4805	0.0238606	0.195235	0.0184217	-0.0122452	0.0599663	1	0
gpeakneg4811	0.00440706	0.897922	0.0343532	-0.062924	0.0717382	1	0
gpeakneg4821	0.0130082	0.697193	0.0334306	-0.0525145	0.0785309	1	0
gpeakneg4831	-0.0208126	0.620871	0.0420784	-0.103285	0.0616595	1	0
gpeakneg4835	-0.00660656	0.644745	0.0143286	-0.0346901	0.021477	1	0
gpeakneg4849	0.000499534	0.986121	0.0287155	-0.0557819	0.0567809	1	0
gpeakneg4867	-0.0321376	0.0738132	0.0179764	-0.0673707	0.00309544	1	0
gpeakneg4872	0.0187526	0.363525	0.0206374	-0.0216961	0.0592013	1	0
gpeakneg4889	-0.0171514	0.263881	0.0153512	-0.0472393	0.0129365	1	0
gpeakneg4888	-0.0288269	0.315674	0.0287296	-0.0851358	0.0274821	1	0
gpeakneg4904	-0.01604	0.304248	0.0156127	-0.0466404	0.0145604	1	0
gpeakneg4906	-0.0319875	0.276746	0.0294096	-0.0896292	0.0256542	1	0
gpeakneg4907	-0.00784149	0.738019	0.023444	-0.0537909	0.0381079	1	0
gpeakneg4920	-0.00433762	0.890761	0.0315827	-0.0662385	0.0575633	1	0
gpeakneg4929	0.0127275	0.427036	0.0160241	-0.0186792	0.0441342	1	0
gpeakneg4939	-0.0050497	0.797835	0.0197138	-0.043688	0.0335886	1	0
gpeakneg4953	-0.0104725	0.531907	0.0167533	-0.0433084	0.0223635	1	0
gpeakneg4958	-0.014384	0.473971	0.0200885	-0.0537567	0.0249887	1	0
gpeakneg4960	-0.00417097	0.751767	0.0131863	-0.0300157	0.0216738	1	0
gpeakneg5034	0.01963	0.0534998	0.0101665	-0.000295834	0.0395559	1	0
gpeakneg5040	0.0219621	0.52544	0.0345869	-0.0458271	0.0897512	1	0
gpeakneg5049	0.0323166	0.115811	0.0205498	-0.00796019	0.0725935	1	0
gpeakneg5055	-0.0027293	0.916668	0.0260849	-0.0538548	0.0483962	1	0
gpeakneg5056	0.0233097	0.351961	0.0250428	-0.0257734	0.0723927	1	0
gpeakneg5070	0.0233468	0.411817	0.0284473	-0.032409	0.0791025	1	0
gpeakneg5079	-0.0206702	0.492834	0.0301399	-0.0797434	0.038403	1	0
gpeakneg5093	0.0415233	0.0377775	0.0199895	0.0023447	0.080702	1	0
gpeakneg5106	-0.00252866	0.914952	0.023678	-0.0489366	0.0438793	1	0
gpeakneg5107	-0.00368322	0.84466	0.0187981	-0.0405268	0.0331603	1	0
gpeakneg5123	-0.0146346	0.137921	0.00986436	-0.0339683	0.00469923	1	0
gpeakneg5127	0.00200215	0.923102	0.0207418	-0.038651	0.0426553	1	0
gpeakneg5145	-0.0260204	0.127545	0.0170754	-0.0594876	0.00744672	1	0
gpeakneg5161	-0.00826051	0.716552	0.0227518	-0.0528532	0.0363322	1	0
gpeakneg5173	-0.00675517	0.774217	0.0235484	-0.0529092	0.0393989	1	0
gpeakneg5174	-0.011519	0.620811	0.0232848	-0.0571563	0.0341183	1	0
gpeakneg5187	0.00420229	0.752347	0.0133175	-0.0218996	0.0303041	1	0
gpeakneg5189	0.00714564	0.758599	0.0232514	-0.0384263	0.0527176	1	0
gpeakneg5190	0.00722677	0.713982	0.0197176	-0.031419	0.0458725	1	0
gpeakneg5191	0.0122364	0.512791	0.0186959	-0.0244069	0.0488797	1	0
gpeakneg5207	0.000727225	0.944314	0.0104114	-0.0196787	0.0211332	1	0
gpeakneg5209	-0.00126854	0.938417	0.016419	-0.0334492	0.0309121	1	0
gpeakneg5218	-0.0109072	0.496982	0.0160578	-0.0423799	0.0205655	1	0
gpeakneg5285	0.0201992	0.0465443	0.0101482	0.000309111	0.0400893	1	0
gpeakneg5292	0.00398031	0.848679	0.0208608	-0.036906	0.0448666	1	0
gpeakneg5302	0.0240237	0.118789	0.015401	-0.00616171	0.054209	1	0
gpeakneg5307	-0.00132495	0.947908	0.0202797	-0.0410725	0.0384226	1	0
gpeakneg5316	0.011672	0.53143	0.0186506	-0.0248825	0.0482266	1	0
gpeakneg5322	0.00760765	0.681453	0.0185335	-0.0287173	0.0439326	1	0
gpeakneg5323	0.00850042	0.540895	0.0139018	-0.0187467	0.0357475	1	0
gpeakneg5331	-0.0072639	0.595961	0.0136998	-0.0341151	0.0195873	1	0
gpeakneg5336	-0.00165179	0.879098	0.010859	-0.0229351	0.0196315	1	0
gpeakneg5361	0.0022255	0.87356	0.0139847	-0.025184	0.029635	1	0
gpeakneg5363	0.00153384	0.915897	0.0145246	-0.0269338	0.0300014	1	0
gpeakneg5373	0.000587361	0.978272	0.0215662	-0.0416816	0.0428563	1	0
gpeakneg5385	0.0228165	0.286743	0.0214181	-0.0191621	0.0647952	1	0
gpeakneg5386	-0.00332727	0.811431	0.0139461	-0.0306611	0.0240066	1	0
gpeakneg5400	-0.00249981	0.871452	0.0154486	-0.0327786	0.027779	1	0
gpeakneg5410	0.0150986	0.267774	0.0136244	-0.0116047	0.0418019	1	0
gpeakneg5416	-0.0108323	0.411068	0.0131777	-0.0366602	0.0149956	1	0
gpeakneg5450	-0.01291	0.353413	0.0139118	-0.0401766	0.0143566	1	0
gpeakneg5459	0.00704587	0.562775	0.0121748	-0.0168164	0.0309081	1	0
gpeakneg5470	-0.00444216	0.776836	0.0156721	-0.0351589	0.0262746	1	0
gpeakneg5502	0.00119771	0.886515	0.00839225	-0.0152508	0.0176462	1	0
gpeakneg5503	-0.00535238	0.409018	0.00648283	-0.0180585	0.00735374	1	0
gpeakneg5513	0.00951824	0.430331	0.0120694	-0.0141374	0.0331739	1	0
gpeakneg5512	-0.00145011	0.901238	0.0116853	-0.0243528	0.0214526	1	0
gpeakneg5524	0.00703511	0.655599	0.0157739	-0.0238812	0.0379514	1	0
gpeakneg5547	0.0163525	0.324307	0.0165907	-0.0161646	0.0488696	1	0
gpeakneg5546	-0.00801456	0.560287	0.0137609	-0.0349854	0.0189563	1	0
gpeakneg5647	0.00287454	0.874637	0.0182197	-0.0328353	0.0385844	1	0
gpeakneg5660	0.00398955	0.724517	0.0113202	-0.0181976	0.0261767	1	0
gpeakneg5675	-0.00187168	0.84292	0.00944529	-0.0203841	0.0166407	1	0
gpeakneg5691	0.00558088	0.657504	0.0125876	-0.0190905	0.0302522	1	0
gpeakneg5701	0.00317944	0.802129	0.0126877	-0.0216879	0.0280468	1	0

## Sheet: 10_lip_cov_panss_pos
lipid	coef	pval	se	ci_low	ci_high	FDR	log10_FDR
gpeakpos1999	-0.00288919	0.690053	0.00724502	-0.0170892	0.0113108	0.896076	0.0476551
gpeakpos2041	0.00158273	0.783117	0.00574995	-0.00968696	0.0128524	0.920864	0.0358047
gpeakpos2069	-0.00378022	0.695807	0.00966839	-0.0227299	0.0151695	0.897094	0.0471622
gpeakpos2099	-0.00443121	0.583931	0.00809128	-0.0202898	0.0114274	0.875529	0.0577297
gpeakpos2229	-0.0116977	0.255341	0.0102839	-0.0318538	0.00845845	0.683811	0.165064
gpeakpos2348	-0.00595822	0.363726	0.00655983	-0.0188153	0.00689882	0.748864	0.125597
gpeakpos2417	-0.0101393	0.247806	0.0087733	-0.0273346	0.00705609	0.679742	0.167656
gpeakpos2561	-0.0117896	0.212469	0.00945582	-0.0303226	0.00674351	0.669513	0.174241
gpeakpos2582	-0.0125671	0.0639731	0.00678435	-0.0258642	0.000729973	0.578259	0.237878
gpeakpos2688	-0.00192995	0.762901	0.00639749	-0.0144688	0.0106089	0.920161	0.0361362
gpeakpos2726	-0.00405307	0.612634	0.00800502	-0.0197426	0.0116365	0.875529	0.0577297
gpeakpos2767	-0.017263	0.168564	0.0125382	-0.0418375	0.0073114	0.640541	0.193453
gpeakpos3064	-0.00320483	0.51394	0.00491	-0.0128282	0.00641859	0.85272	0.0691934
gpeakpos3098	-0.00978509	0.544344	0.0161402	-0.0414192	0.0218491	0.869506	0.0607274
gpeakpos3375	-0.00888695	0.292693	0.0084458	-0.0254404	0.00766651	0.72474	0.139818
gpeakpos3419	-0.00570634	0.658448	0.0129086	-0.0310067	0.019594	0.887709	0.0517295
gpeakpos3441	-0.0210845	0.127915	0.0138497	-0.0482294	0.00606047	0.619629	0.207868
gpeakpos4188	0.00930532	0.68509	0.0229462	-0.0356684	0.054279	0.896076	0.0476551
gpeakpos4442	-0.0250457	0.114644	0.0158752	-0.0561606	0.00606917	0.607671	0.216331
gpeakpos4465	-0.0190885	0.316118	0.0190415	-0.0564093	0.0182322	0.743138	0.12893
gpeakpos4494	-0.00702817	0.673288	0.0166687	-0.0396982	0.0256418	0.891414	0.0499206
gpeakpos5151	-0.00334635	0.772469	0.0115732	-0.0260294	0.0193367	0.920161	0.0361362
gpeakpos5531	0.0069126	0.659019	0.0156653	-0.0237909	0.037616	0.887709	0.0517295
gpeakpos5562	0.0072027	0.60783	0.0140356	-0.0203066	0.0347119	0.875529	0.0577297
gpeakpos5917	0.00511384	0.675112	0.0122007	-0.0187992	0.0290269	0.891414	0.0499206
gpeakpos6622	0.00959385	0.328048	0.00980913	-0.00963169	0.0288194	0.743138	0.12893
gpeakpos7122	0.0216742	0.213858	0.0174366	-0.012501	0.0558494	0.669513	0.174241
gpeakpos7158	0.0222422	0.104119	0.0136858	-0.00458143	0.0490659	0.578259	0.237878
gpeakpos7470	-0.000680006	0.828547	0.00313996	-0.00683422	0.00547421	0.936852	0.028329
gpeakpos7514	-0.00156994	0.596945	0.00296887	-0.00738881	0.00424894	0.875529	0.0577297
gpeakpos7549	0.00627582	0.471629	0.00871845	-0.010812	0.0233637	0.830527	0.0806465
gpeakpos7586	0.0280045	0.0756513	0.0157639	-0.00289218	0.0589012	0.578259	0.237878
gpeakpos7730	-0.00041071	0.906089	0.00348141	-0.00723414	0.00641272	0.948111	0.0231408
gpeakpos7769	-0.000474607	0.885559	0.00329757	-0.00693773	0.00598851	0.945164	0.024493
gpeakpos7961	-0.00159854	0.639	0.00340768	-0.00827747	0.0050804	0.882967	0.0540555
gpeakpos7997	-0.000928151	0.775926	0.00326088	-0.00731935	0.00546305	0.920161	0.0361362
gpeakpos8043	3.68123e-05	0.990854	0.00321134	-0.0062573	0.00633092	0.993606	0.00278568
gpeakpos8324	-0.000832597	0.830451	0.00388839	-0.00845371	0.00678851	0.936852	0.028329
gpeakpos8631	-0.000692368	0.861949	0.00398156	-0.00849608	0.00711135	0.944932	0.0245995
gpeakpos8679	0.000749162	0.842589	0.00377253	-0.00664486	0.00814319	0.94336	0.0253225
gpeakpos8733	0.000540805	0.890627	0.00393282	-0.00716739	0.008249	0.945164	0.024493
gpeakpos9000	0.000360516	0.942717	0.00501728	-0.00947317	0.0101942	0.966821	0.014654
gpeakpos9264	-0.00129313	0.786555	0.00477546	-0.0106529	0.00806661	0.921904	0.0353144
gpeakpos9328	0.00117237	0.802236	0.00468097	-0.00800217	0.0103469	0.925911	0.0334307
gpeakpos9390	0.00154121	0.751283	0.00486265	-0.00798941	0.0110718	0.919366	0.0365113
gpeakpos9446	0.00276194	0.573382	0.00490507	-0.00685183	0.0123757	0.875529	0.0577297
gpeakpos9505	0.00208579	0.724064	0.00590821	-0.00949409	0.0136657	0.91855	0.036897
gpeakpos9794	0.000281829	0.960134	0.00563823	-0.0107689	0.0113326	0.980839	0.00840236
gpeakpos9863	0.00254158	0.640824	0.00544764	-0.00813559	0.0132188	0.882967	0.0540555
gpeakpos9918	0.00466301	0.379618	0.00530732	-0.00573914	0.0150652	0.748864	0.125597
gpeakpos10107	0.000397131	0.939605	0.00524156	-0.00987614	0.0106704	0.966375	0.0148544
gpeakpos10171	0.00279183	0.61449	0.00554293	-0.00807211	0.0136558	0.875529	0.0577297
gpeakpos10236	0.00377009	0.556005	0.00640316	-0.00877988	0.0163201	0.875529	0.0577297
gpeakpos10371	0.00670099	0.333176	0.0069244	-0.00687057	0.0202726	0.743138	0.12893
gpeakpos10445	0.00898573	0.421176	0.011171	-0.012909	0.0308804	0.791899	0.10133
gpeakpos10660	0.00393005	0.553798	0.00663771	-0.00907963	0.0169397	0.875529	0.0577297
gpeakpos10723	0.00682849	0.371775	0.00764538	-0.00815617	0.0218132	0.748864	0.125597
gpeakpos10860	0.00646332	0.354164	0.00697575	-0.00720889	0.0201355	0.748864	0.125597
gpeakpos10926	0.00720394	0.336067	0.00748878	-0.0074738	0.0218817	0.743138	0.12893
gpeakpos11003	0.00288777	0.613967	0.00572494	-0.00833291	0.0141084	0.875529	0.0577297
gpeakpos11076	0.00575943	0.356745	0.00624949	-0.00648934	0.0180082	0.748864	0.125597
gpeakpos11134	0.010513	0.204146	0.00827909	-0.0057137	0.0267397	0.669513	0.174241
gpeakpos11200	0.0207708	0.087567	0.0121582	-0.00305889	0.0446005	0.578259	0.237878
gpeakpos11253	0.0241746	0.066433	0.0131706	-0.00163939	0.0499886	0.578259	0.237878
gpeakpos11314	0.0217742	0.0522326	0.0112168	-0.000210344	0.0437588	0.578259	0.237878
gpeakpos11389	0.00982972	0.324443	0.00997568	-0.00972225	0.0293817	0.743138	0.12893
gpeakpos11522	0.00325807	0.673848	0.00774122	-0.0119144	0.0184306	0.891414	0.0499206
gpeakpos11585	0.00626908	0.514939	0.00962747	-0.0126004	0.0251386	0.85272	0.0691934
gpeakpos11639	0.0152711	0.155481	0.010751	-0.00580048	0.0363427	0.624686	0.204338
gpeakpos11690	0.0163217	0.0957497	0.00979803	-0.00288206	0.0355255	0.578259	0.237878
gpeakpos11823	0.00389842	0.537934	0.00632921	-0.00850661	0.0163034	0.866938	0.062012
gpeakpos11828	0.00159909	0.846672	0.00826976	-0.0146093	0.0178075	0.94336	0.0253225
gpeakpos11905	0.00805423	0.261605	0.0071746	-0.00600772	0.0221162	0.684345	0.164725
gpeakpos11964	0.0112972	0.223577	0.00928231	-0.00689577	0.0294902	0.669513	0.174241
gpeakpos12022	0.0229285	0.102858	0.0140566	-0.00462194	0.0504789	0.578259	0.237878
gpeakpos12080	0.0349514	0.0926841	0.020787	-0.00579039	0.0756932	0.578259	0.237878
gpeakpos12125	0.0361823	0.0578097	0.0190721	-0.00119821	0.0735629	0.578259	0.237878
gpeakpos12192	0.0122414	0.0973986	0.00738501	-0.00223297	0.0267157	0.578259	0.237878
gpeakpos12323	0.00897745	0.210305	0.00716633	-0.00506829	0.0230232	0.669513	0.174241
gpeakpos12430	0.0121966	0.295116	0.0116495	-0.010636	0.0350293	0.72474	0.139818
gpeakpos12484	0.02151	0.0634894	0.011591	-0.00120796	0.0442279	0.578259	0.237878
gpeakpos12743	0.0174154	0.0676243	0.00952964	-0.00126231	0.0360932	0.578259	0.237878
gpeakpos12792	0.0226854	0.0625467	0.0121807	-0.0011884	0.0465592	0.578259	0.237878
gpeakpos12841	0.0269799	0.0718013	0.0149857	-0.00239155	0.0563514	0.578259	0.237878
gpeakpos12892	0.0274283	0.116148	0.0174574	-0.00678769	0.0616442	0.607671	0.216331
gpeakpos12955	0.0193266	0.0155873	0.00799136	0.00366384	0.0349894	0.578259	0.237878
gpeakpos13012	0.00621383	0.375903	0.00701755	-0.00754031	0.019968	0.748864	0.125597
gpeakpos13066	0.0110304	0.186269	0.00834563	-0.00532674	0.0273875	0.649102	0.187687
gpeakpos13118	0.0156292	0.1592	0.0111021	-0.00613055	0.037389	0.624686	0.204338
gpeakpos13174	0.0176519	0.132881	0.0117457	-0.00536929	0.0406731	0.619629	0.207868
gpeakpos13342	0.0106702	0.138891	0.00720993	-0.00346098	0.0248014	0.622826	0.205633
gpeakpos13459	0.0254404	0.0244843	0.0113097	0.00327392	0.0476069	0.578259	0.237878
gpeakpos13500	0.0307151	0.0232595	0.013536	0.00418507	0.0572451	0.578259	0.237878
gpeakpos13549	0.0263732	0.0280928	0.0120097	0.00283458	0.0499119	0.578259	0.237878
gpeakpos13594	0.0296793	0.0241	0.0131584	0.00388921	0.0554694	0.578259	0.237878
gpeakpos13728	0.00885684	0.257655	0.00782441	-0.00647872	0.0241924	0.683811	0.165064
gpeakpos13775	0.0118691	0.166968	0.00858829	-0.00496361	0.0287019	0.640541	0.193453
gpeakpos13980	0.0116013	0.131512	0.00769233	-0.00347539	0.026678	0.619629	0.207868
gpeakpos14026	0.0170015	0.0644428	0.00919444	-0.0010193	0.0350222	0.578259	0.237878
gpeakpos14078	0.0183194	0.0888912	0.010768	-0.00278556	0.0394243	0.578259	0.237878
gpeakpos14294	0.0240319	0.0944429	0.0143696	-0.00413199	0.0521957	0.578259	0.237878
gpeakneg291	-0.00245081	0.779717	0.00876267	-0.0196253	0.0147237	0.920161	0.0361362
gpeakneg300	-0.00120812	0.88709	0.0085087	-0.0178849	0.0154686	0.945164	0.024493
gpeakneg372	-4.64585e-05	0.99496	0.00735499	-0.014462	0.0143691	0.99496	0.00219433
gpeakneg378	0.00197479	0.870645	0.0121273	-0.0217943	0.0257438	0.945164	0.024493
gpeakneg391	0.00665062	0.506326	0.0100074	-0.0129636	0.0262648	0.850157	0.0705007
gpeakneg437	-0.00319504	0.595266	0.00601454	-0.0149833	0.00859324	0.875529	0.0577297
gpeakneg451	-0.00596839	0.558955	0.010213	-0.0259854	0.0140486	0.875529	0.0577297
gpeakneg731	-0.00799201	0.41012	0.00970278	-0.0270091	0.0110251	0.785841	0.104665
gpeakneg1173	-0.000784288	0.929443	0.00885739	-0.0181445	0.0165759	0.961401	0.0170956
gpeakneg1346	-0.00596682	0.411424	0.00726428	-0.0202046	0.00827092	0.785841	0.104665
gpeakneg1472	-0.00246923	0.743703	0.00755226	-0.0172714	0.0123329	0.91855	0.036897
gpeakneg1488	0.00338153	0.705026	0.00893297	-0.0141268	0.0208898	0.902533	0.0445368
gpeakneg1516	0.0185979	0.0599642	0.00988697	-0.000780155	0.037976	0.578259	0.237878
gpeakneg1533	0.0160564	0.100953	0.00978901	-0.00312966	0.0352426	0.578259	0.237878
gpeakneg1541	0.00378142	0.776376	0.0133128	-0.0223112	0.029874	0.920161	0.0361362
gpeakneg1580	0.0124206	0.339662	0.0130082	-0.0130749	0.0379162	0.743138	0.12893
gpeakneg1638	0.00711217	0.241559	0.00607308	-0.00479085	0.0190152	0.675992	0.170058
gpeakneg1645	0.0037708	0.601653	0.0072234	-0.0103868	0.0179284	0.875529	0.0577297
gpeakneg1652	0.00298949	0.688265	0.00745116	-0.0116145	0.0175935	0.896076	0.0476551
gpeakneg1661	0.00258136	0.736982	0.00768598	-0.0124829	0.0176456	0.91855	0.036897
gpeakneg1677	0.0213091	0.0450842	0.010634	0.000466872	0.0421514	0.578259	0.237878
gpeakneg1699	0.029443	0.0228383	0.0129356	0.00408976	0.0547962	0.578259	0.237878
gpeakneg1723	0.00847937	0.372333	0.00950484	-0.0101498	0.0271085	0.748864	0.125597
gpeakneg1722	0.00630073	0.416432	0.00775354	-0.00889593	0.0214974	0.787079	0.103982
gpeakneg1737	0.00287162	0.64506	0.00623404	-0.00934687	0.0150901	0.885425	0.0528482
gpeakneg1778	0.0042497	0.391117	0.00495537	-0.00546266	0.013962	0.763206	0.117358
gpeakneg1793	0.00309629	0.562413	0.00534524	-0.00738018	0.0135728	0.875529	0.0577297
gpeakneg1860	0.00864065	0.0542777	0.00448955	-0.000158706	0.01744	0.578259	0.237878
gpeakneg2026	0.000893838	0.881473	0.00599479	-0.0108557	0.0126434	0.945164	0.024493
gpeakneg2039	-0.00392016	0.753854	0.012502	-0.0284237	0.0205834	0.919396	0.0364973
gpeakneg2174	-0.00374698	0.535432	0.00604609	-0.0155971	0.00810315	0.866938	0.062012
gpeakneg2200	-0.00434194	0.610649	0.00852787	-0.0210563	0.0123724	0.875529	0.0577297
gpeakneg2206	-0.00172956	0.844529	0.00881967	-0.0190158	0.0155567	0.94336	0.0253225
gpeakneg2319	-0.00244327	0.742929	0.00744951	-0.017044	0.0121575	0.91855	0.036897
gpeakneg2333	-0.00605899	0.602197	0.0116241	-0.0288418	0.0167238	0.875529	0.0577297
gpeakneg2339	0.0012067	0.887589	0.00853663	-0.0155248	0.0179382	0.945164	0.024493
gpeakneg2428	0.00557858	0.510494	0.00847719	-0.0110364	0.0221936	0.85272	0.0691934
gpeakneg2429	-0.0104063	0.367657	0.0115514	-0.0330466	0.012234	0.748864	0.125597
gpeakneg2515	-0.00657118	0.635427	0.0138603	-0.0337368	0.0205944	0.882967	0.0540555
gpeakneg2552	0.00359567	0.77456	0.012554	-0.0210098	0.0282011	0.920161	0.0361362
gpeakneg2559	-0.013159	0.505087	0.0197433	-0.0518551	0.0255371	0.850157	0.0705007
gpeakneg2635	-0.0131643	0.37909	0.0149667	-0.0424986	0.0161699	0.748864	0.125597
gpeakneg2637	0.0200535	0.122596	0.0129883	-0.00540307	0.0455101	0.614682	0.211349
gpeakneg2660	-0.00957027	0.280288	0.00886405	-0.0269435	0.00780295	0.712563	0.147177
gpeakneg2668	-0.0170337	0.201199	0.0133269	-0.0431539	0.00908656	0.669513	0.174241
gpeakneg2680	-0.00726735	0.658571	0.0164462	-0.0395013	0.0249666	0.887709	0.0517295
gpeakneg2698	-0.0132796	0.438622	0.0171455	-0.0468841	0.020325	0.802504	0.0955527
gpeakneg2744	-0.012017	0.185244	0.00907097	-0.0297958	0.00576173	0.649102	0.187687
gpeakneg2747	0.0215292	0.214662	0.0173503	-0.0124769	0.0555352	0.669513	0.174241
gpeakneg2762	-0.00642346	0.53112	0.0102562	-0.0265253	0.0136784	0.866938	0.062012
gpeakneg2765	0.0371195	0.0228088	0.0163047	0.005163	0.0690761	0.578259	0.237878
gpeakneg2787	-0.00467891	0.606254	0.00907771	-0.0224709	0.0131131	0.875529	0.0577297
gpeakneg2795	-0.00162886	0.919847	0.0161873	-0.0333553	0.0300976	0.954209	0.0203563
gpeakneg2811	-0.00558165	0.662637	0.0127939	-0.0306572	0.0194939	0.889264	0.0509692
gpeakneg2822	-0.0138505	0.30599	0.0135302	-0.0403692	0.0126682	0.736416	0.132877
gpeakneg2832	-0.0155787	0.183112	0.0117024	-0.038515	0.00735766	0.649102	0.187687
gpeakneg2886	0.0170529	0.174935	0.0125711	-0.00758601	0.0416918	0.649102	0.187687
gpeakneg2895	0.0166622	0.159027	0.011831	-0.00652612	0.0398505	0.624686	0.204338
gpeakneg2900	-0.00398224	0.746082	0.0122981	-0.028086	0.0201216	0.91855	0.036897
gpeakneg2914	0.00272828	0.820138	0.0119994	-0.0207902	0.0262467	0.936852	0.028329
gpeakneg2927	0.0112135	0.274838	0.0102689	-0.00891316	0.0313402	0.70869	0.149544
gpeakneg3029	0.011579	0.102959	0.00710072	-0.00233818	0.0254961	0.578259	0.237878
gpeakneg3053	0.0196473	0.0713759	0.0108965	-0.00170951	0.041004	0.578259	0.237878
gpeakneg3071	0.0121978	0.115534	0.00775055	-0.00299299	0.0273886	0.607671	0.216331
gpeakneg3239	0.00644064	0.248548	0.00558171	-0.00449931	0.0173806	0.679742	0.167656
gpeakneg3247	0.0103006	0.238782	0.00874385	-0.00683706	0.0274382	0.67344	0.171701
gpeakneg3252	0.0135988	0.150617	0.00946096	-0.00494436	0.0321419	0.624686	0.204338
gpeakneg3257	0.0181063	0.0723245	0.0100755	-0.00164123	0.0378539	0.578259	0.237878
gpeakneg3264	0.0123322	0.35596	0.0133597	-0.0138523	0.0385167	0.748864	0.125597
gpeakneg3268	0.0205052	0.0401646	0.00999253	0.000920197	0.0400902	0.578259	0.237878
gpeakneg3276	0.0161586	0.0721212	0.00898522	-0.00145212	0.0337693	0.578259	0.237878
gpeakneg3285	0.00471158	0.438768	0.00608516	-0.0072151	0.0166383	0.802504	0.0955527
gpeakneg3402	0.0161402	0.058905	0.00854474	-0.000607209	0.0328875	0.578259	0.237878
gpeakneg3463	-0.00216414	0.829773	0.0100661	-0.0218933	0.017565	0.936852	0.028329
gpeakneg3495	0.000434693	0.972431	0.012578	-0.0242177	0.0250871	0.983326	0.00730233
gpeakneg3514	0.0135964	0.144079	0.00930768	-0.00464634	0.0318391	0.624686	0.204338
gpeakneg3531	0.0238551	0.101171	0.0145529	-0.00466801	0.0523781	0.578259	0.237878
gpeakneg3534	0.00467109	0.679055	0.0112896	-0.017456	0.0267982	0.891414	0.0499206
gpeakneg3543	0.0234012	0.0505947	0.0119705	-6.05966e-05	0.0468629	0.578259	0.237878
gpeakneg3566	0.0135286	0.130749	0.00895249	-0.00401795	0.0310752	0.619629	0.207868
gpeakneg3609	-0.0182302	0.0391852	0.00884003	-0.0355564	-0.000904091	0.578259	0.237878
gpeakneg3625	0.00727798	0.409994	0.00883352	-0.0100354	0.0245914	0.785841	0.104665
gpeakneg3647	0.0110567	0.186534	0.00837055	-0.0053493	0.0274626	0.649102	0.187687
gpeakneg3666	0.00816217	0.333075	0.00843252	-0.00836526	0.0246896	0.743138	0.12893
gpeakneg3680	-0.0046465	0.596124	0.00876728	-0.0218301	0.0125371	0.875529	0.0577297
gpeakneg3685	0.00337898	0.678092	0.00814079	-0.0125767	0.0193346	0.891414	0.0499206
gpeakneg3687	0.016199	0.0831369	0.00934864	-0.00212397	0.034522	0.578259	0.237878
gpeakneg3706	0.0152211	0.188797	0.0115825	-0.00748019	0.0379224	0.649102	0.187687
gpeakneg3714	-0.00412344	0.618089	0.0082707	-0.0203337	0.0120868	0.875529	0.0577297
gpeakneg3735	-0.00853582	0.322312	0.00862451	-0.0254395	0.0083679	0.743138	0.12893
gpeakneg3762	-0.00572773	0.605365	0.0110852	-0.0274543	0.0159989	0.875529	0.0577297
gpeakneg3786	0.00550124	0.390436	0.00640552	-0.00705336	0.0180558	0.763206	0.117358
gpeakneg3819	0.0142727	0.354866	0.0154267	-0.0159631	0.0445085	0.748864	0.125597
gpeakneg3824	-0.00634127	0.37387	0.00713105	-0.0203179	0.00763533	0.748864	0.125597
gpeakneg3836	-0.00823398	0.217128	0.0066715	-0.0213099	0.00484193	0.669513	0.174241
gpeakneg3839	0.00844301	0.285108	0.00789867	-0.0070381	0.0239241	0.719748	0.142819
gpeakneg3840	0.00843553	0.168213	0.00612172	-0.00356281	0.0204339	0.640541	0.193453
gpeakneg3846	0.0070953	0.632934	0.0148561	-0.0220221	0.0362127	0.882967	0.0540555
gpeakneg3852	0.00211468	0.742072	0.00642543	-0.0104789	0.0147083	0.91855	0.036897
gpeakneg3855	-0.00394879	0.739789	0.0118892	-0.0272512	0.0193536	0.91855	0.036897
gpeakneg3872	0.0151745	0.138215	0.0102359	-0.00488758	0.0352366	0.622826	0.205633
gpeakneg3892	0.00571727	0.489797	0.00827832	-0.0105079	0.0219425	0.834041	0.0788125
gpeakneg3913	0.00339338	0.739508	0.0102055	-0.0166091	0.0233958	0.91855	0.036897
gpeakneg3935	0.00654484	0.44571	0.00858243	-0.0102764	0.0233661	0.804001	0.0947435
gpeakneg3944	0.0019529	0.884272	0.0134168	-0.0243435	0.0282493	0.945164	0.024493
gpeakneg3952	-0.0031382	0.802798	0.0125665	-0.0277681	0.0214917	0.925911	0.0334307
gpeakneg3953	-0.00911491	0.373497	0.0102421	-0.0291891	0.0109593	0.748864	0.125597
gpeakneg3966	0.0144897	0.435727	0.0185902	-0.0219464	0.0509259	0.802504	0.0955527
gpeakneg3974	0.00651188	0.571712	0.0115146	-0.0160563	0.0290801	0.875529	0.0577297
gpeakneg3993	0.00651432	0.573697	0.0115786	-0.0161794	0.029208	0.875529	0.0577297
gpeakneg3994	-0.00038777	0.976258	0.0130294	-0.0259249	0.0251494	0.984438	0.00681144
gpeakneg4012	0.0146844	0.0866716	0.00857124	-0.00211488	0.0314838	0.578259	0.237878
gpeakneg4014	0.00279449	0.796529	0.010838	-0.0184477	0.0240367	0.925911	0.0334307
gpeakneg4047	-0.00164501	0.908963	0.0143861	-0.0298413	0.0265513	0.948369	0.0230227
gpeakneg4062	0.0510727	0.0828564	0.0294478	-0.00664389	0.108789	0.578259	0.237878
gpeakneg4069	-0.00805723	0.465204	0.0110327	-0.0296809	0.0135665	0.823229	0.0844793
gpeakneg4077	0.0642084	0.0604352	0.034197	-0.00281641	0.131233	0.578259	0.237878
gpeakneg4079	0.00971745	0.29844	0.00934564	-0.00859967	0.0280346	0.727952	0.137897
gpeakneg4081	0.00251347	0.774856	0.0087875	-0.0147097	0.0197366	0.920161	0.0361362
gpeakneg4101	0.0122377	0.227059	0.0101308	-0.00761833	0.0320938	0.669513	0.174241
gpeakneg4106	-0.0026451	0.829594	0.0122901	-0.0267332	0.021443	0.936852	0.028329
gpeakneg4124	0.0185134	0.133674	0.0123442	-0.00568073	0.0427076	0.619629	0.207868
gpeakneg4141	0.0129772	0.149469	0.00900312	-0.00466862	0.030623	0.624686	0.204338
gpeakneg4151	-0.00765718	0.376703	0.0086621	-0.0246346	0.00932022	0.748864	0.125597
gpeakneg4172	-0.0066334	0.540608	0.0108408	-0.0278809	0.0146141	0.867376	0.0617925
gpeakneg4181	0.0129731	0.437656	0.0167145	-0.0197867	0.0457329	0.802504	0.0955527
gpeakneg4187	-0.0159722	0.157459	0.0112984	-0.0381165	0.00617222	0.624686	0.204338
gpeakneg4189	-0.00673116	0.617564	0.013481	-0.0331535	0.0196912	0.875529	0.0577297
gpeakneg4200	0.00881877	0.525045	0.013875	-0.0183757	0.0360132	0.861551	0.0647188
gpeakneg4210	0.00919612	0.359507	0.0100361	-0.0104743	0.0288665	0.748864	0.125597
gpeakneg4215	-0.00346656	0.884025	0.023765	-0.0500452	0.0431121	0.945164	0.024493
gpeakneg4239	0.0121027	0.0900229	0.00713907	-0.00188962	0.026095	0.578259	0.237878
gpeakneg4244	0.027276	0.226476	0.0225517	-0.0169246	0.0714766	0.669513	0.174241
gpeakneg4292	-0.00201204	0.852676	0.0108346	-0.0232474	0.0192233	0.944932	0.0245995
gpeakneg4304	0.00794307	0.65508	0.017781	-0.0269071	0.0427933	0.887709	0.0517295
gpeakneg4319	0.0217256	0.368559	0.0241617	-0.0256305	0.0690817	0.748864	0.125597
gpeakneg4321	0.00643625	0.482239	0.00915924	-0.0115155	0.024388	0.834041	0.0788125
gpeakneg4323	-0.00570084	0.672218	0.0134738	-0.032109	0.0207073	0.891414	0.0499206
gpeakneg4333	0.00969437	0.628737	0.0200502	-0.0296033	0.048992	0.882967	0.0540555
gpeakneg4339	0.0116364	0.226059	0.00961228	-0.00720335	0.0304761	0.669513	0.174241
gpeakneg4342	0.0168773	0.180921	0.0126145	-0.00784673	0.0416013	0.649102	0.187687
gpeakneg4359	0.0176268	0.0490069	0.00895428	7.67152e-05	0.0351769	0.578259	0.237878
gpeakneg4360	0.0165795	0.0387432	0.0080214	0.00085781	0.0323011	0.578259	0.237878
gpeakneg4363	0.0269302	0.338768	0.0281519	-0.0282465	0.0821068	0.743138	0.12893
gpeakneg4380	0.018023	0.0279673	0.00820067	0.00194996	0.034096	0.578259	0.237878
gpeakneg4417	-0.0141654	0.0447912	0.00705937	-0.0280015	-0.000329289	0.578259	0.237878
gpeakneg4438	0.00189226	0.84492	0.00967395	-0.0170683	0.0208529	0.94336	0.0253225
gpeakneg4439	-0.0576824	0.0104213	0.0225188	-0.101818	-0.0135465	0.578259	0.237878
gpeakneg4448	0.0142255	0.214336	0.0114562	-0.00822825	0.0366793	0.669513	0.174241
gpeakneg4454	-0.00886635	0.638742	0.0188863	-0.0458828	0.0281501	0.882967	0.0540555
gpeakneg4456	-0.0230363	0.155767	0.016229	-0.0548447	0.008772	0.624686	0.204338
gpeakneg4457	-0.0430527	0.0269452	0.0194605	-0.0811947	-0.0049108	0.578259	0.237878
gpeakneg4472	0.0207554	0.23672	0.0175413	-0.013625	0.0551358	0.67344	0.171701
gpeakneg4474	0.0160679	0.0780212	0.00911764	-0.00180237	0.0339381	0.578259	0.237878
gpeakneg4476	-0.0187267	0.338374	0.0195603	-0.0570642	0.0196108	0.743138	0.12893
gpeakneg4477	-0.0169715	0.259507	0.0150515	-0.046472	0.012529	0.683811	0.165064
gpeakneg4494	-0.00357753	0.79363	0.0136756	-0.0303812	0.0232262	0.925911	0.0334307
gpeakneg4501	0.0158991	0.334781	0.0164838	-0.0164086	0.0482068	0.743138	0.12893
gpeakneg4563	0.00360762	0.766053	0.0121248	-0.0201565	0.0273717	0.920161	0.0361362
gpeakneg4574	-0.00179083	0.890326	0.0129872	-0.0272453	0.0236636	0.945164	0.024493
gpeakneg4579	0.0109377	0.487043	0.0157372	-0.0199067	0.041782	0.834041	0.0788125
gpeakneg4580	0.0119466	0.319726	0.0120064	-0.0115855	0.0354788	0.743138	0.12893
gpeakneg4581	-0.0265441	0.00419641	0.00927141	-0.0447157	-0.00837248	0.578259	0.237878
gpeakneg4588	0.0121441	0.608536	0.0237114	-0.0343293	0.0586175	0.875529	0.0577297
gpeakneg4593	-0.00116237	0.96988	0.0307841	-0.0614981	0.0591734	0.983326	0.00730233
gpeakneg4606	0.0456651	0.179864	0.0340486	-0.0210689	0.112399	0.649102	0.187687
gpeakneg4623	0.0348887	0.187678	0.0264814	-0.0170138	0.0867911	0.649102	0.187687
gpeakneg4632	-0.019711	0.106213	0.0122016	-0.0436257	0.00420363	0.580956	0.235857
gpeakneg4667	0.0180751	0.254355	0.0158576	-0.0130053	0.0491555	0.683811	0.165064
gpeakneg4669	0.00579109	0.193816	0.00445683	-0.00294414	0.0145263	0.660071	0.180409
gpeakneg4671	-0.00234788	0.912341	0.0213276	-0.0441492	0.0394534	0.94915	0.0226653
gpeakneg4684	0.00237013	0.898598	0.0185991	-0.0340834	0.0388236	0.945754	0.0242216
gpeakneg4685	0.00543871	0.493623	0.00794485	-0.0101329	0.0210103	0.83661	0.077477
gpeakneg4687	-0.044956	0.0275365	0.0203991	-0.0849374	-0.00497457	0.578259	0.237878
gpeakneg4698	0.00436005	0.748072	0.013575	-0.0222464	0.0309665	0.91855	0.036897
gpeakneg4702	-0.00640109	0.744642	0.0196526	-0.0449196	0.0321174	0.91855	0.036897
gpeakneg4706	-0.0207619	0.302015	0.0201158	-0.060188	0.0186643	0.731729	0.13565
gpeakneg4707	-0.0153574	0.34857	0.0163835	-0.0474685	0.0167537	0.748864	0.125597
gpeakneg4715	0.00626683	0.648169	0.0137338	-0.0206509	0.0331846	0.886322	0.0524085
gpeakneg4721	0.0107903	0.589237	0.0199842	-0.028378	0.0499586	0.875529	0.0577297
gpeakneg4724	-0.00203894	0.8928	0.01513	-0.0316931	0.0276152	0.945164	0.024493
gpeakneg4781	0.00792072	0.569663	0.0139315	-0.0193845	0.035226	0.875529	0.0577297
gpeakneg4782	-0.00750716	0.464982	0.0102744	-0.0276445	0.0126302	0.823229	0.0844793
gpeakneg4783	-0.0254563	0.0277572	0.0115674	-0.048128	-0.00278469	0.578259	0.237878
gpeakneg4797	-0.0187702	0.310248	0.0184983	-0.0550262	0.0174857	0.741718	0.129761
gpeakneg4798	-0.016757	0.170522	0.0122267	-0.0407209	0.00720686	0.641236	0.192982
gpeakneg4805	0.00929597	0.548553	0.0154951	-0.0210739	0.0396658	0.872369	0.0593
gpeakneg4811	0.0366851	0.243705	0.0314683	-0.0249917	0.0983619	0.676749	0.169573
gpeakneg4821	0.0315699	0.277898	0.0290953	-0.0254558	0.0885956	0.711498	0.147826
gpeakneg4831	-0.0063059	0.859115	0.0355261	-0.0759358	0.063324	0.944932	0.0245995
gpeakneg4835	0.00805252	0.489407	0.0116492	-0.0147794	0.0308845	0.834041	0.0788125
gpeakneg4849	0.0337922	0.139966	0.0228957	-0.0110825	0.0786669	0.622826	0.205633
gpeakneg4867	-0.0164555	0.236183	0.0138914	-0.0436821	0.0107712	0.67344	0.171701
gpeakneg4872	0.00999401	0.618448	0.0200662	-0.0293351	0.0493231	0.875529	0.0577297
gpeakneg4889	0.00217791	0.862541	0.0125788	-0.0224762	0.026832	0.944932	0.0245995
gpeakneg4888	-0.0393954	0.0772391	0.0222959	-0.0830946	0.00430376	0.578259	0.237878
gpeakneg4904	-0.000203907	0.987762	0.013294	-0.0262598	0.0258519	0.993265	0.00293476
gpeakneg4906	-0.0162536	0.483893	0.0232176	-0.0617592	0.029252	0.834041	0.0788125
gpeakneg4907	-0.0225524	0.215666	0.0182148	-0.0582527	0.013148	0.669513	0.174241
gpeakneg4920	0.00401444	0.864569	0.0235366	-0.0421164	0.0501453	0.944932	0.0245995
gpeakneg4929	0.0112985	0.436586	0.014523	-0.0171661	0.0397631	0.802504	0.0955527
gpeakneg4939	-0.00235088	0.895678	0.0179289	-0.0374909	0.0327891	0.945438	0.0243668
gpeakneg4953	0.00413043	0.778431	0.01468	-0.0246418	0.0329027	0.920161	0.0361362
gpeakneg4958	-0.0015051	0.933026	0.0179097	-0.0366076	0.0335974	0.96235	0.016667
gpeakneg4960	0.00256296	0.82406	0.0115279	-0.0200314	0.0251573	0.936852	0.028329
gpeakneg5034	0.0152471	0.0673689	0.00833539	-0.00108993	0.0315842	0.578259	0.237878
gpeakneg5040	0.0468818	0.121974	0.030314	-0.0125325	0.106296	0.614682	0.211349
gpeakneg5049	0.0262435	0.153254	0.0183762	-0.00977305	0.0622601	0.624686	0.204338
gpeakneg5055	0.0184489	0.44224	0.0240089	-0.0286078	0.0655055	0.802504	0.0955527
gpeakneg5056	0.0551475	0.0065377	0.0202784	0.0154026	0.0948925	0.578259	0.237878
gpeakneg5070	0.030985	0.228117	0.0257089	-0.0194035	0.0813735	0.669513	0.174241
gpeakneg5079	0.0316771	0.237714	0.0268287	-0.0209061	0.0842603	0.67344	0.171701
gpeakneg5093	0.0401032	0.0373793	0.0192656	0.00234333	0.077863	0.578259	0.237878
gpeakneg5106	0.0243897	0.236538	0.0206049	-0.0159952	0.0647745	0.67344	0.171701
gpeakneg5107	-0.00731224	0.623118	0.0148793	-0.0364752	0.0218507	0.878694	0.0561623
gpeakneg5123	-0.0122634	0.149521	0.00850903	-0.0289408	0.00441398	0.624686	0.204338
gpeakneg5127	0.0199871	0.255987	0.0175954	-0.0144993	0.0544735	0.683811	0.165064
gpeakneg5145	-0.00526622	0.700241	0.0136787	-0.0320759	0.0215435	0.899598	0.0459515
gpeakneg5161	-0.00313797	0.866406	0.0186533	-0.0396978	0.0334219	0.944932	0.0245995
gpeakneg5173	0.0152283	0.448491	0.0200919	-0.0241511	0.0546077	0.804001	0.0947435
gpeakneg5174	-0.0203771	0.214206	0.0164056	-0.0525314	0.0117773	0.669513	0.174241
gpeakneg5187	0.0185625	0.141473	0.0126248	-0.00618154	0.0433066	0.622826	0.205633
gpeakneg5189	0.0133774	0.488911	0.0193304	-0.0245094	0.0512643	0.834041	0.0788125
gpeakneg5190	0.0108332	0.520162	0.0168454	-0.0221831	0.0438495	0.857436	0.0667985
gpeakneg5191	0.0257947	0.119718	0.016578	-0.00669757	0.0582869	0.614682	0.211349
gpeakneg5207	0.00635704	0.484432	0.00909198	-0.0114629	0.024177	0.834041	0.0788125
gpeakneg5209	0.00476195	0.730195	0.0138081	-0.0223015	0.0318254	0.91855	0.036897
gpeakneg5218	-0.00324292	0.802191	0.0129451	-0.0286149	0.0221291	0.925911	0.0334307
gpeakneg5285	0.0153567	0.0640993	0.00829425	-0.000899724	0.0316131	0.578259	0.237878
gpeakneg5292	0.0443948	0.0117518	0.0176204	0.00985946	0.0789302	0.578259	0.237878
gpeakneg5302	0.0193333	0.133881	0.0128977	-0.00594575	0.0446124	0.619629	0.207868
gpeakneg5307	0.0342357	0.0549805	0.0178401	-0.000730264	0.0692017	0.578259	0.237878
gpeakneg5316	0.0200275	0.226818	0.0165709	-0.0124508	0.0525058	0.669513	0.174241
gpeakneg5322	-0.00604767	0.694797	0.0154138	-0.0362582	0.0241629	0.897094	0.0471622
gpeakneg5323	0.0129848	0.26828	0.0117294	-0.0100044	0.0359739	0.696757	0.156919
gpeakneg5331	0.00277358	0.823699	0.0124493	-0.0216267	0.0271738	0.936852	0.028329
gpeakneg5336	-0.00818059	0.399026	0.00969998	-0.0271922	0.010831	0.774454	0.111004
gpeakneg5361	-0.0116886	0.293362	0.0111238	-0.0334908	0.0101136	0.72474	0.139818
gpeakneg5363	0.00684586	0.576497	0.0122574	-0.0171782	0.0308699	0.875529	0.0577297
gpeakneg5373	0.0226531	0.202212	0.0177633	-0.0121623	0.0574685	0.669513	0.174241
gpeakneg5385	0.0300302	0.102064	0.0183679	-0.00597026	0.0660306	0.578259	0.237878
gpeakneg5386	0.00721678	0.562946	0.0124756	-0.017235	0.0316685	0.875529	0.0577297
gpeakneg5400	0.0129579	0.335071	0.0134425	-0.0133889	0.0393046	0.743138	0.12893
gpeakneg5410	0.022518	0.0745396	0.0126273	-0.00223094	0.047267	0.578259	0.237878
gpeakneg5416	-0.000530209	0.96182	0.011076	-0.0222388	0.0211784	0.980839	0.00840236
gpeakneg5450	-0.00153467	0.902255	0.012496	-0.0260264	0.022957	0.946843	0.0237219
gpeakneg5459	0.0181146	0.0908708	0.0107135	-0.00288346	0.0391127	0.578259	0.237878
gpeakneg5470	0.0126117	0.415725	0.0154962	-0.0177602	0.0429837	0.787079	0.103982
gpeakneg5502	0.00748318	0.292602	0.00711037	-0.0064529	0.0214193	0.72474	0.139818
gpeakneg5503	0.000994246	0.855851	0.00547316	-0.00973295	0.0117214	0.944932	0.0245995
gpeakneg5513	0.00335577	0.715193	0.00919663	-0.0146693	0.0213808	0.912313	0.039856
gpeakneg5512	0.00996884	0.313473	0.0098901	-0.0094154	0.0293531	0.743138	0.12893
gpeakneg5524	0.0103327	0.442378	0.0134508	-0.0160304	0.0366957	0.802504	0.0955527
gpeakneg5547	0.0329435	0.0197334	0.0141305	0.00524826	0.0606388	0.578259	0.237878
gpeakneg5546	0.00715655	0.536273	0.0115716	-0.0155233	0.0298364	0.866938	0.062012
gpeakneg5647	0.00446989	0.77997	0.0160006	-0.0268907	0.0358305	0.920161	0.0361362
gpeakneg5660	0.00920951	0.343819	0.00972857	-0.00985814	0.0282772	0.747703	0.126271
gpeakneg5675	-0.000303824	0.966971	0.00733741	-0.0146849	0.0140772	0.983314	0.00730772
gpeakneg5691	0.00743941	0.449884	0.0098456	-0.0118576	0.0267364	0.804001	0.0947435
gpeakneg5701	0.0171302	0.0770136	0.00968748	-0.00185691	0.0361173	0.578259	0.237878

[truncated: 25 more sheets: 11_lip_cov_panss_neg, 12_lip_cov_panss_gen, 13_lip_cov_panss_tot, 14_enrich_std, 15_enrich_cov_diag, 16_enrich_cov_med, 17_enrich_cov_med_diag, 18_enrich_cov_panss_pos, 19_enrich_cov_panss_neg, 20_enrich_cov_panss_gen, 21_enrich_cov_panss_tot, 22_enrich_cov_antidepressants, 23_enrich_cov_antipsychotics, 24_enrich_cov_mood_stabilizers, 25_enrich_cov_tranquilizers, 26_prs_panss_std, 27_lip_panss_std, 28_lip_panss_cov_med, 29_lip_panss_cov_diag, 30_lip_panss_cov_med_diag …]
